# Supplementary material for: MicroRNA-449a Enhances Radiosensitivity in CL1-0 Lung Adenocarcinoma Cells
Source: PLoS One. 2013 Apr 17;8(4):e62383. doi: 10.1371/journal.pone.0062383 (PMC3629161; doi:10.1371/journal.pone.0062383)
Supplement: Table S1 — Normalized miRNA microarray data for CL1-0 and CL1-5. Illumina Human microRNA BeadChips were used. (XLS) [file pone.0062383.s002.xls]

## Sheet: CL1-0
ID_CL1-0	CL1-0_0h_1	CL1-0_0h_2	CL1-0_0h_3	CL1-0_1h_1	CL1-0_1h_2	CL1-0_1h_3	CL1-0_4h_1	CL1-0_4h_2	CL1-0_4h_3	CL1-0_24h_1	CL1-0_24h_2	CL1-0_24h_3
HS_1	117.875	88.5417	75.375	76.75	103.042	169.083	76.75	75.375	77.125	90.7083	59.0833	102
HS_10	2655.71	1863.33	3040.63	2497.5	1352	1991.92	2584.38	2211.38	3255.75	2026.13	2267.38	2681.54
HS_100	21633.3	22075.7	22916.2	21036.4	21196.3	23079.7	21196.3	21196.3	23231.5	21504.6	19821.5	23485.9
HS_101	57.25	58.6667	56.7083	69.25	53.4167	60.5417	54.3333	73.3333	58.6667	61.7917	60.7917	57.25
HS_104	467.167	427.708	256.667	508.708	402.583	553.583	536.375	575.208	340.167	443.25	534.25	505.792
HS_105	569.833	453.542	490.792	567.25	448.333	658.833	494.917	527.583	560.292	455.5	394.042	470.917
HS_106	587.917	569.833	563.75	668.708	641.167	525.208	512.958	658.833	475.75	618.75	492.792	515.042
HS_107	67.375	74.5417	65.375	69.25	74.875	67.375	67.2083	65.0417	85.5833	67.8333	66.3333	73.125
HS_108.1	796.208	661.833	1533.79	1137.29	438.083	828.542	1132.88	960.708	1272.71	610.333	900.083	771
HS_109	120.333	126.5	144.542	83.1042	100.167	138	98.9583	149.167	159.917	124.5	140.833	95.7917
HS_11.1	180.75	190.625	260.167	178.167	184.542	217.125	260.833	208.833	198	189.25	231	201.5
HS_110	986.375	828.542	1082.25	1025.71	747.917	1058.92	952.083	891.333	1132.88	747.917	738.125	812.125
HS_111	165.167	210.458	193.5	201.5	234.833	274	184.542	201.5	218.667	155	200.042	173.292
HS_112	151.542	228.167	213.875	204.5	314.5	223.208	233.125	325.083	215.167	271.125	265.625	301.958
HS_113	1397.21	1217.33	1159.67	1436.46	1145.79	1126.29	1312.04	1047.54	1319.79	1272.71	891.333	1082.25
HS_114	704.625	542.958	741.125	755.625	483.25	652.292	656.208	560.292	846.5	629.5	544.875	747.917
HS_115	64.4167	57.25	80.1667	62.1667	57.25	58.375	63.0417	81.7917	79.7083	70.8333	67.8333	60.5417
HS_116	715.25	658.833	641.167	711.667	595.458	766.958	610.333	648.792	673.125	567.25	457.5	641.167
HS_117	332.958	290	268.25	266.417	312	387.167	205.208	347.042	348.5	286.125	189.25	275.917
HS_119	357.667	364.542	271.875	361.583	384	249.208	325.083	321.042	330.708	333.708	286.125	249.208
HS_12	190.958	171.333	220.917	157.292	206.583	212.292	218.667	194.208	147.583	209.625	214.333	247.167
HS_120	549.708	546.833	715.25	618.75	515.042	808.708	592.25	599.625	612.792	499	396.75	606.917
HS_121	185.125	177.25	163.625	185.792	178.542	150.917	185.792	142.542	177.75	185.125	145.333	174.833
HS_122.1	406.917	374.667	368.292	411.667	339.333	396.75	399.75	332.958	396.75	345.458	439.917	337.042
HS_123	371.542	360.125	308.958	396.75	333.708	357.667	378.25	318.75	402.583	378.25	284.333	327.625
HS_124	58.375	66.3333	36.375	50.75	38.5	40.8333	52.375	40.3333	57.9167	46.6667	35	56.0833
HS_126	1036.79	1521	1397.21	1087.71	1476.83	1587.54	1192.75	1637.75	1265.71	1242.71	1251.75	1258.13
HS_127.1	147.583	138	78.875	150.25	140.833	93.4792	162.833	99.5417	138.458	151.542	255.708	151.542
HS_128	536.375	584.125	771	542.958	579.042	540.542	579.042	656.208	661.833	534.25	503.375	546.833
HS_129	140.833	104.958	119.5	127.583	129.708	126.125	157.792	117.875	110.292	118.333	79.25	100.167
HS_13	421.167	345.458	487.042	313.042	248.167	571.875	256.667	293.75	254.958	288.292	263.792	310.667
HS_130	254.042	253.042	370.125	221.833	270.333	280.125	241.083	199.5	213.125	210.458	183.917	223.208
HS_131	557.958	538.792	410.042	520.375	357.667	755.625	549.708	417.125	463.375	425.583	569.833	553.583
HS_132.1	759	704.625	838.125	896.583	774.625	759	796.208	1008.71	1587.54	824.208	641.167	942.375
HS_133.1	293.75	335.667	339.333	294.583	286.125	357.667	334.417	284.333	328.708	355.792	318.75	355.792
HS_134	90.7083	104.958	101.542	90.4167	90.7083	82.7917	106.417	108.208	91.625	81	83.1042	106.646
HS_135	102	142.542	188.417	104.625	126.5	115.167	104.167	149.167	143.167	128.625	154.375	134.75
HS_136	228.167	221.833	182.958	199.5	294.583	350.667	207.542	228.167	223.875	182.958	128.625	189.75
HS_137	79.7083	71.125	74.0417	69.25	67.8333	80.1667	68.0417	72.375	67.5833	62.5833	66.3333	70.8333
HS_138	505.792	584.125	581.5	529.75	542.958	540.542	520.375	536.375	563.75	512.958	490.792	549.708
HS_139	2406.96	2134.13	2424.58	2454.88	2100.17	2440.04	2375.88	1979.04	2454.88	2007.88	1749.21	2134.13
HS_14.1	149.667	345.458	150.917	195.083	202.208	286.958	252.083	288.292	178.542	181.292	345.458	187.75
HS_140	182.292	173.833	157.292	174.833	155.542	155.542	159.917	164.208	203.875	160.917	113.292	183.375
HS_141	540.542	505.792	546.833	612.792	453.542	468.708	525.208	478.708	556.083	556.083	563.75	480.125
HS_142.1	886.542	846.5	891.333	1053.54	656.208	851.708	805.25	937.875	986.375	766.958	1041.04	971.5
HS_143	92.2083	79.7083	49.4167	60.5417	71.125	69.375	95.3333	75.375	53.4167	61.7917	45.75	65.375
HS_144	222.583	185.792	215.875	254.042	175.333	206.583	197.375	160.375	243.792	197.375	140.833	164.208
HS_145.1	966.417	851.708	859.25	991.875	876.375	805.25	937.875	761.625	926.083	900.083	689.25	755.625
HS_146.1	100.083	85.4167	90.4167	110.292	84.375	95.3333	105.375	87.125	106.646	97.8542	80.7917	87.375
HS_147	381.667	461.042	553.583	475.75	529.75	444.583	457.5	629.5	595.458	459.25	421.167	473.708
HS_149	1863.33	1597.33	2155.63	2026.13	1533.79	2172.21	2066.54	2120.92	2080.83	1419.5	1281.25	1713
HS_15.1	249.208	203.875	288.292	206.583	280.125	285.5	263	231	342.875	259.125	245.625	231.917
HS_150	2497.5	1884.08	2267.38	2539.25	1884.08	2080.83	2440.04	1749.21	2640.83	1991.92	1637.75	2172.21
HS_151.1	138	130.583	170.208	137.167	143.792	147.167	130.583	162.333	167.125	127.917	159.417	162.833
HS_152	2440.04	2100.17	1875.58	2389.63	2120.92	1786.58	2285.04	1724.29	2120.92	2100.17	1533.79	1848.63
HS_153	606.917	569.833	579.042	592.25	549.708	595.458	615.542	481.292	673.125	625.792	461.042	610.333
HS_154	63.0417	67.375	40	90.4167	52.375	101.25	64.6667	95.3333	90.7083	43.2083	79.25	58.6667
HS_155	100.083	164.625	138	147.167	169.083	152.5	124.5	176.833	147.583	121.708	154.375	141.375
HS_156	300.75	332.958	306.208	304.75	306.208	264.792	226.5	354.583	549.708	312	160.375	349.833
HS_157	595.458	708.625	828.542	673.125	610.333	774.625	641.167	673.125	717.125	599.625	755.625	645.5
HS_159	82.4583	75.1667	119.5	89	75.9167	116.667	82.4583	98.1667	98.1667	84.0417	99.5417	76.3333
HS_16	89	80.4167	98.1667	93.4792	81.7917	85.5833	89.9167	68.4583	110.292	82.7917	73.125	85.5833
HS_160	2754.38	2155.63	3020.75	3393.25	1863.33	2319.33	3060.21	2640.83	3218.21	2824.46	2774.42	2824.46
HS_161	72.375	62.5833	66.3333	72.375	59.5417	69.375	75.9167	57.25	78.2917	66.3333	64.6667	64.1667
HS_162	69.25	61.0417	63.4583	69.25	66.0833	65.0417	66.0833	62.1667	62.5833	78.5	66.3333	59.5417
HS_163	2519.25	2584.38	2375.88	2708	2211.38	2497.5	1825.25	2497.5	3992.58	1813.42	1761.13	2640.83
HS_164	56.0833	77.4583	134.583	75.1667	98.5417	99.5417	78.5	59.7917	71.4583	84.0417	70.2917	94.375
HS_166.1	900.083	867.667	793.083	815.75	942.375	966.417	886.542	934.125	1184	1097.75	747.917	1003.75
HS_167.1	701.042	636.458	783.667	726.083	557.958	832.083	661.833	592.25	708.625	641.167	697.042	685.542
HS_168	512.958	499	444.583	531.75	487.042	427.708	483.25	470.917	423.333	483.25	443.25	398.375
HS_169	360.125	366.958	557.958	384	429.375	604	365.958	304.75	427.708	304.75	223.208	373.375
HS_17	974.917	1192.75	1265.71	1296.58	1110.08	1272.71	971.5	1178.75	1378.25	952.083	872.583	1223.58
HS_170	461.042	612.792	774.625	778	563.75	747.917	761.625	1053.54	788	421.167	615.542	557.958
HS_174.1	158.375	274	254.958	157.292	470.917	134.583	159.417	165.167	171.875	210.458	231	183.375
HS_175	410.042	384	448.333	441.875	357.667	432.958	387.167	371.542	483.25	448.333	354.583	529.75
HS_176	429.375	328.708	353.417	408.458	399.75	415.583	411.667	485.083	453.542	404.5	301.958	483.25
HS_177	282.167	245.625	228.167	283.458	275.917	194.208	241.083	266.417	240.333	284.333	209.625	293.75
HS_179	151.542	127.583	130.583	133.875	119.875	143.167	135.417	111.208	147.583	124.5	120.333	125.167
HS_18	132.75	131.208	136.083	167.125	160.917	208.333	104.167	162.333	238.208	146.625	110.292	173.292
HS_182.1	345.458	399.75	697.042	453.542	291.667	470.917	395.25	378.25	512.958	301.958	312	376.042
HS_183.1	41.2917	41.7917	67.5833	40.3333	54.0417	56.7083	41.7917	50.2917	48.7917	36.375	48.25	51.1667
HS_184	1724.29	1813.42	1597.33	1863.33	1959.25	1476.83	1619.04	1544.5	1959.25	1587.54	1436.46	1660.13
HS_185.1	58.375	54.0417	65.375	64.1667	50.2917	65.0417	61.7917	58.375	60.7917	59.0833	53.7917	56.0833
HS_186	512.958	520.375	525.208	490.792	529.75	499	542.958	487.042	505.792	516.708	529.75	567.25
HS_187	117.875	140.292	107	168.333	188.417	177.25	190.958	171.333	167.125	149.667	182.958	149.667
HS_188	1510.67	1939.38	2007.88	1637.75	1713	2389.63	1460.42	1825.25	2066.54	1619.04	1242.71	2039.17
HS_189.1	111.833	80.4167	100.083	81.7917	80.4167	75.9167	63.0417	89.9167	98.1667	85.5833	75.75	97.8542
HS_19	1575.83	1544.5	1094.04	1587.54	1606.58	1223.58	1430.08	1281.25	1469.42	1436.46	1192.75	1328.17
HS_190	116.208	132.75	138	128.625	122.875	171.333	107.646	138.458	142.042	121.708	80.7917	127.583
HS_192.1	20137.7	22781.3	19453.6	18726.1	22916.2	23231.5	19453.6	22781.3	12591.3	21633.3	22460	22075.7
HS_193	232.583	270.333	244.917	187.75	213.875	339.333	244.917	231	332.958	254.958	164.208	229.333
HS_194	236.667	169.792	387.167	291.667	191.458	330.708	263	228.167	313.042	243.042	291.667	239.458
HS_195	127.583	128.958	160.917	120.583	92.2083	157.292	140.833	164.208	194.208	106.646	97.2917	114.167
HS_196.1	1288.67	1460.42	1735.17	1544.5	1397.21	1724.29	1265.71	1606.58	2355.5	1209.38	1345.08	1449.96
HS_197	200.042	254.958	189.75	233.125	239.458	297	182.958	211.708	326.5	191.458	157.292	214.333
HS_198	115.167	68.0417	146.125	90.4167	73.3333	66.0833	132.208	185.792	164.625	129.708	124.167	111.208
HS_199	612.792	512.958	536.375	569.833	444.583	523.208	604	391.875	490.792	604	425.583	531.75
HS_2	1013.42	1132.88	1114.25	1025.71	1132.88	1203.42	1013.42	1110.08	1110.08	979.792	841.833	1137.29
HS_20	1047.54	1103.96	1087.71	1110.08	1097.75	1145.79	1137.29	1082.25	1217.33	1152.79	1070.38	1114.25
HS_200	439.917	417.125	417.125	487.042	387.167	451.417	473.708	425.583	478.708	400.917	400.917	459.25
HS_201	279.083	267.208	290.708	280.125	220.917	303.167	279.083	254.042	325.083	312	334.417	291.667
HS_202.1	170.208	149.167	259.125	165.167	148.125	130.208	199.5	194.208	185.125	229	277	159.917
HS_203	815.75	612.792	618.75	824.208	581.5	658.833	744.083	461.042	704.625	726.083	413.333	604
HS_204.1	14877.2	15509.2	17850.5	15509.2	15302.7	17580	15075.2	14723.4	19643.8	14216.4	13596.8	17850.5
HS_205.1	222.583	248.167	198.917	250.042	252.083	205.208	213.125	234.208	241.958	217.833	205.208	209.625
HS_206	101.25	228.167	148.125	190.625	142.042	201.5	167.625	189.75	149.667	172.458	170.208	196
HS_208	443.25	378.25	385.042	438.083	335.667	374.667	441.875	274	373.375	398.375	268.25	387.167
HS_209.1	4806.33	5380.92	3777.79	3558.5	5440.54	4420.67	4420.67	4869.25	3869.08	5591.04	6081.46	4177.5
HS_21	163.625	149.667	116.208	177.25	136.292	148.542	157.792	130.208	225.75	153.792	146.625	130.208
HS_211	120.333	112.833	122.875	133.875	110.917	136.292	120.583	111.208	120.583	110.917	110.292	105.375
HS_215	246.5	207.542	269.25	330.708	211.708	229	345.458	232.583	248.167	200.042	180.208	203.875
HS_216	64.4167	71.125	69.7083	63.0417	74.0417	71.4583	66.0833	77.125	68.7917	66.3333	71.9583	74.0417
HS_217	87.125	77.4583	144.542	81.7917	77.125	78.875	74.875	64.4167	46	78.5	66.3333	120.333
HS_218	51.1667	55.75	51.3333	56.25	50.2917	71.4583	56.0833	62.1667	50.75	60.7917	52.375	67.375
HS_219	676.167	629.5	584.125	704.625	612.792	575.208	645.5	523.208	606.917	629.5	520.375	538.792
HS_22.1	1597.33	1959.25	1510.67	1378.25	1489.08	1217.33	1521	1469.42	2026.13	1786.58	1606.58	2080.83
HS_220	130.208	151.917	126.5	131.208	135.417	111.208	139.417	115.875	120.583	151.542	112.333	126.5
HS_221	96.1667	174.833	104.625	158.375	151.542	196.75	88.1042	181.292	208.333	159.417	103.042	159.917
HS_228.1	190.958	263.792	223.875	204.5	195.083	153.792	330.708	254.042	183.917	138.458	126.5	143.792
HS_23	523.208	399.75	520.375	534.25	390.25	529.75	457.5	358.833	523.208	360.125	327.625	339.333
HS_231	234.208	189.25	366.958	249.208	203.875	348.5	208.833	212.292	130.583	200.75	178.167	167.625
HS_232	339.333	267.208	427.708	307.375	280.125	438.083	387.167	315.958	413.333	322.25	241.083	370.125
HS_239	1813.42	2026.13	1825.25	1786.58	1939.38	1939.38	1908.63	1837.08	1979.04	1959.25	2080.83	1979.04
HS_24	2640.83	2306.42	2708	3172	2539.25	2618.96	2539.25	2955.88	4950.33	2918.58	1813.42	3777.79
HS_240	127.125	155	162.333	206.583	198	166.167	138	156.167	291.667	125.5	61.7917	156.167
HS_241.1	828.542	738.125	947.625	788	851.708	1082.25	780.208	780.208	824.208	668.708	581.5	801.042
HS_242	379.875	167.625	244.917	252.083	138.917	166.167	283.458	187.75	236.667	260.167	345.458	211.042
HS_243.1	3748.21	4309.71	5751.04	4806.33	4065.96	4869.25	4349.88	5491.71	5285.25	5187.92	3445.71	5825.75
HS_244	3279.83	2918.58	3474.38	3233.54	2918.58	3109.54	3146.96	2878.21	3591.08	3020.75	2584.38	3084.63
HS_25	1587.54	1337.75	1489.08	1660.13	1258.13	1597.33	1469.42	1533.79	1713	1076.17	937.875	1178.75
HS_250	457.5	438.083	470.917	536.375	490.792	443.25	467.167	673.125	490.792	515.042	525.208	468.708
HS_251.1	164.208	144.958	142.042	162.833	146.625	142.042	145.333	148.125	169.792	148.125	132.75	145.333
HS_252.1	592.25	523.208	429.375	553.583	505.792	494.917	544.875	411.667	503.375	549.708	443.25	411.667
HS_253	67.375	86.4583	69.7083	75.1667	80.4167	81.375	68.0417	70.8333	68.7917	70.8333	59.0833	78.2917
HS_254	480.125	645.5	632.792	538.792	546.833	676.167	544.875	629.5	726.083	536.375	294.583	629.5
HS_255	299.708	399.75	475.75	269.25	417.125	307.375	272.958	345.458	285.5	338.042	360.125	333.708
HS_257	337.042	465.333	780.208	373.375	261.792	632.792	425.583	645.5	390.25	465.333	483.25	494.917
HS_258	65.7917	73.125	78.0417	60.5417	63.4583	67.375	52.375	70.8333	59.5417	53.7917	74.5417	60.5417
HS_26.1	280.875	164.625	132.75	164.625	160.917	198	194.208	157.292	215.875	185.792	257.875	195.083
HS_260	5751.04	6212.92	4385.83	5973.54	4950.33	5928.46	5534.54	5751.04	3653	5491.71	4385.83	5339.13
HS_261.1	92.2083	120.333	127.917	122.875	96.7083	99.5417	117.417	128.958	159.917	100.688	151.917	130.208
HS_262.1	1223.58	1173.08	1352	1217.33	1223.58	1288.67	1103.96	1097.75	1258.13	1167.71	1258.13	1272.71
HS_263.1	5591.04	7049.08	7926.92	6995.63	6020.25	7807.21	6466.67	6995.63	6850.42	6276.46	6020.25	6466.67
HS_264.1	49.7083	49.9167	47.9167	46.2917	49.7083	47.5833	50.2917	50.2917	52.375	48.7917	45.75	49.9167
HS_265.1	328.708	307.375	243.042	328.708	326.5	235.708	312	313.042	293.75	330.708	306.208	284.333
HS_266.1	42.3333	62.5833	112.333	42.3333	60.5417	40	60.125	70.8333	67.5833	53.7917	46.6667	51.1667
HS_267	161.875	167.625	157.292	181.292	176.167	184.542	173.292	164.208	146.125	151.542	182.958	179.125
HS_268	1328.17	1145.79	1036.79	1408.92	1103.96	1019.92	1337.75	880.792	1120.46	1229.08	793.083	960.708
HS_269	123.583	104.958	190.625	92.2083	210.458	97.2917	118.333	121.125	89.25	119.875	99.5417	124.167
HS_27	726.083	656.208	632.792	738.125	606.917	615.542	717.125	529.75	685.542	734.583	527.583	701.042
HS_273	314.5	228.167	294.583	274	187.208	254.958	371.542	270.333	315.958	244.917	167.125	303.167
HS_275	4028.33	3777.79	3839.71	4385.83	4028.33	3718.17	3952.42	3621	4677.33	3653	3172	3869.08
HS_276.1	1192.75	1008.71	952.083	1120.46	974.917	991.875	1110.08	1025.71	960.708	991.875	909.917	934.125
HS_278	71.125	110.917	85.4167	70.625	67.8333	99.5417	73.6667	90.7083	75.75	74.875	52.375	67.375
HS_279_a	1229.08	971.5	1288.67	1328.17	788	1137.29	1070.38	1013.42	1647.21	1296.58	1047.54	1319.79
HS_280_a	581.5	496.292	604	465.333	645.5	406.917	435.792	610.333	423.333	623	584.125	569.833
HS_280_b	512.958	431.208	432.958	459.25	697.042	681.542	358.833	481.292	363.292	402.583	398.375	363.292
HS_282	340.167	334.417	404.5	278.042	411.667	417.125	363.292	408.458	381.667	394.042	363.292	408.458
HS_283_a	249.208	202.917	214.333	266.417	241.083	212.292	259.125	271.125	301.958	282.167	223.208	223.208
HS_283_b	44.2083	51.3333	56.7083	35.7083	43.2083	73.3333	42.625	37.0833	33.7917	46.6667	60.7917	37.9583
HS_284	53.4167	52.625	56.7083	56.25	55.75	55.3333	57.4167	50.2917	60.7917	56.25	48.25	52.625
HS_284.1	909.917	1234.33	1132.88	1013.42	1013.42	1312.04	1229.08	1312.04	1476.83	3748.21	2155.63	3255.75
HS_285	499	510.875	441.875	481.292	515.042	540.542	492.792	510.875	529.75	527.583	623	587.917
HS_286_a	56.0833	47.5833	44.2083	47.5833	47.9167	58.375	49	46	46	44.2083	48.25	53.7917
HS_287	14723.4	14723.4	15509.2	15302.7	13083.2	15509.2	14532.8	14877.2	16473.1	13596.8	11752.5	14216.4
HS_29	1775.38	1436.46	3591.08	1825.25	766.958	2155.63	1575.83	1019.92	1449.96	859.25	771	761.625
HS_3	264.792	293.75	271.125	275.917	208.333	326.5	255.708	411.667	291.667	247.167	299.708	267.208
HS_30	75.375	63.4583	55.3333	71.125	75.375	60.5417	77.4583	77.125	70.8333	59.0833	81.7917	57.25
HS_303_a	3393.25	3445.71	3653	3748.21	2708	3474.38	4220.71	3474.38	3474.38	3233.54	2999.83	3340.33
HS_303_b	1178.75	960.708	1544.5	1058.92	636.458	1076.17	1053.54	942.375	1460.42	864.042	1013.42	880.792
HS_304_a	641.167	641.167	408.458	685.542	499	689.25	584.125	490.792	542.958	475.75	473.708	527.583
HS_304_b	274	271.875	282.167	215.167	317.333	171.333	277	310.667	250.042	261.792	312	269.25
HS_305_b	270.333	223.875	217.125	213.125	131.667	293.75	201.5	250.042	415.583	191.458	381.667	284.333
HS_31.1	487.042	553.583	439.917	505.792	569.833	505.792	402.583	544.875	435.792	417.125	446.417	439.917
HS_32	2681.54	2895.88	3952.42	3218.21	2424.58	2375.88	3310.46	2977.63	2424.58	2319.33	2618.96	2584.38
HS_33	556.083	516.708	438.083	557.958	478.708	544.875	553.583	536.375	534.25	520.375	480.125	542.958
HS_35	451.417	286.958	435.792	374.667	350.667	512.958	330.708	330.708	485.083	352.25	214.333	439.917
HS_36.1	159.417	140.292	119.5	144.958	114.75	124.5	140.292	147.167	173.833	180.208	127.583	133.875
HS_37	187.208	152.958	198.917	243.042	166.167	225.75	211.042	179.792	238.667	226.5	229	176.833
HS_38.1	2039.17	1724.29	1761.13	2195.04	1597.33	1702.04	2120.92	1449.96	2052	1837.08	1234.33	1637.75
HS_4.1	179.792	149.667	168.333	185.792	166.167	264.792	150.917	260.833	263.792	202.208	193.5	222.583
HS_40	1076.17	1082.25	900.083	1265.71	1234.33	838.125	986.375	986.375	864.042	926.083	820.875	838.125
HS_41	51.1667	44.2083	49.4167	49.4167	44.2083	43.9583	49	41.2917	79.7083	46.6667	40.8333	49
HS_42	722.167	747.917	567.25	689.25	971.5	581.5	738.125	916.083	689.25	998.167	1152.79	711.667
HS_43.1	213.875	172.458	177.75	195.083	159.417	190.958	188.417	131.667	181.667	189.25	134.75	151.542
HS_44.1	67.375	65.375	52.375	62.1667	66.0833	52.9167	76.75	59.7917	56.7083	57.25	77.25	64.1667
HS_45.1	319.833	266.417	314.5	338.042	257.875	275.917	286.958	238.667	244.917	299.708	184.542	260.833
HS_46	189.75	136.083	81	109.542	138	150.917	130.583	130.208	218.667	143.167	170.208	176.833
HS_47	232.583	194.208	175.333	227.375	193.5	187.75	206.583	162.333	205.708	198.917	180.208	167.625
HS_48.1	759	812.125	864.042	796.208	722.167	846.5	788	832.083	974.917	741.125	815.75	872.583
HS_49	459.25	355.792	419	444.583	357.667	411.667	423.333	260.833	283.458	408.458	387.167	330.708
HS_5.1	2285.04	2754.38	2235.75	2618.96	2039.17	2519.25	2497.5	2774.42	2306.42	1724.29	1895.04	2007.88
HS_50	89	85.4167	69.7083	61.0417	74.875	51.625	59.0833	85.5833	91.625	55.3333	77.25	66.0833
HS_51	185.125	181.292	158.625	166.167	183.917	174.375	144.958	182.292	196	184.542	207.542	185.792
HS_52	2878.21	2340.79	3084.63	2797.92	2052	3146.96	2774.42	2319.33	3393.25	2235.75	2195.04	2618.96
HS_53	257.875	321.042	264.792	300.75	342.875	339.333	279.083	323.625	557.958	304.75	236.667	357.667
HS_54	531.75	480.125	1013.42	515.042	592.25	1184	480.125	612.792	766.958	411.667	512.958	463.375
HS_55	120.333	178.542	146.125	161.875	125.167	184.542	170.667	167.625	186.417	135.417	169.792	138.917
HS_55.1	160.917	122.125	167.125	165.167	105.792	178.167	155	170.667	109.542	117.417	134.75	145.333
HS_56	212.292	161.875	238.208	179.792	180.75	260.833	254.958	236.667	159.917	187.208	185.125	218.667
HS_57.1	90.4167	86.4583	78.0417	86.7708	94.9167	84.8542	81	81.7917	117.875	87.375	92.7917	87.375
HS_58	152.958	240.333	191.458	171.875	182.292	187.75	187.208	177.75	180.75	148.125	174.375	164.208
HS_59	95.3333	92.2083	73.125	121.708	144.958	139.417	147.583	87.125	96.7083	122.875	187.75	109.833
HS_6	1419.5	1430.08	1837.08	1606.58	1510.67	2100.17	1397.21	1875.58	1702.04	1408.92	1296.58	1386.46
HS_60	490.792	391.875	618.75	503.375	366.958	587.917	499	415.583	636.458	408.458	390.25	431.208
HS_61	85.9583	47.5833	55.3333	65.375	44.2083	51.625	54.3333	43.5417	59.5417	49.9167	40.8333	49
HS_62	290.708	286.958	557.958	425.583	245.625	368.292	373.375	374.667	395.25	352.25	272.958	425.583
HS_63	138	135.417	105.792	127.583	127.583	124.167	132.208	112.333	125.5	166.167	106.646	153.792
HS_64	358.833	529.75	455.5	656.208	278.042	531.75	410.042	404.5	411.667	388.708	465.333	538.792
HS_65	636.458	534.25	527.583	581.5	463.375	496.292	668.708	612.792	738.125	612.792	368.292	592.25
HS_66	43.5417	49.4167	38.5	40.3333	40.8333	42.3333	42.625	39.125	40.8333	41.2917	94.9167	40
HS_67	56.0833	49.4167	46.2917	49.4167	51.1667	54.3333	49	59.7917	48.7917	49.9167	43.2083	46.2917
HS_68	1008.71	880.792	1025.71	947.625	921.708	1053.54	956.208	1126.29	1288.67	1234.33	1103.96	1251.75
HS_69	35	34.4583	69.7083	43.5417	36.375	34.4583	46.6667	39.125	46	32.0833	37.0833	35.7083
HS_7	384	448.333	510.875	388.708	379.875	429.375	421.167	348.5	378.25	421.167	384	421.167
HS_70	49.7083	55.75	54.0417	45.75	69.7083	80.4167	68.0417	52.9167	65.0417	60.125	64.6667	55.0417
HS_71.1	1895.04	1848.63	1627.63	1959.25	1837.08	1564.79	1735.17	1813.42	1564.79	1735.17	1303.5	1430.08
HS_72	166.167	264.792	229.333	213.875	230.125	210.458	197.375	239.458	210.458	206.583	143.792	178.167
HS_73.1	134.75	138.917	114.75	129.708	138.917	122.875	111.833	152.5	135.417	141.375	132.75	120.333
HS_74	167.125	183.375	210.458	190.625	163.625	203.375	274.917	191.458	246.5	174.375	185.792	212.292
HS_75.1	303.167	366.958	391.875	313.042	292.625	378.25	368.292	342.875	322.25	385.042	260.167	328.708
HS_76	130.208	202.917	130.583	174.833	325.083	234.208	149.667	203.875	87.125	158.375	143.792	254.958
HS_77	156.167	87.375	166.167	110.292	149.667	223.208	93.8333	109.542	81.7917	94.9167	82.4583	118.875
HS_78	1031.17	1126.29	1053.54	846.5	1288.67	979.792	886.542	1120.46	1008.71	876.375	880.792	855.542
HS_79.1	335.667	315.958	402.583	288.292	277	254.958	365.958	463.375	378.25	315.958	314.5	318.75
HS_8	349.833	350.667	312	265.625	444.583	350.667	344.292	361.583	326.5	333.708	333.708	353.417
HS_80	263.792	219.542	193.5	247.167	191.458	307.375	264.792	266.417	308.958	278.042	187.75	205.208
HS_81	2172.21	2039.17	1724.29	2267.38	2155.63	1761.13	2026.13	1606.58	2039.17	1895.04	1619.04	1678.25
HS_82.1	126.125	132.208	184.542	172.458	104.625	160.917	120.583	160.375	238.667	142.542	136.083	148.125
HS_83.1	78.2917	69.25	76.75	76.75	73.3333	69.375	78.5	52.9167	85.5833	89	56.25	80.7917
HS_84	207.542	171.333	171.333	211.708	179.125	178.167	174.833	160.375	176.167	177.75	154.375	142.542
HS_85.1	178.167	128.958	172.458	148.125	116.667	147.167	162.833	98.1667	161.875	172.458	107.646	165.625
HS_86	228.167	248.167	326.5	240.333	241.083	241.958	234.208	236.667	241.083	263.792	314.5	299.708
HS_87	84.8542	75.1667	64.4167	94.9167	87.7083	49.4167	57.4167	144.958	87.125	107.646	73.125	121.708
HS_88	71.125	83.75	127.917	96.7083	75.9167	56.0833	63.0417	79.25	56.7083	69.375	59.0833	70.8333
HS_89	95.3333	109.542	105.792	131.208	104.625	131.667	152.5	126.125	117.875	94.9167	88.5417	97.8542
HS_9	223.875	314.5	347.042	333.708	224.75	312	321.042	328.708	333.708	250.042	196.75	374.667
HS_90	378.25	371.542	323.625	374.667	371.542	317.333	318.75	342.875	353.417	335.667	373.375	286.958
HS_91.1	2389.63	2247.33	2977.63	3194.67	1724.29	2977.63	2618.96	3040.63	3839.71	2655.71	2026.13	3060.21
HS_92	157.292	143.792	205.708	159.417	129.708	180.208	156.167	150.917	213.125	135.417	149.167	154.375
HS_93	177.25	161.875	184.542	173.833	158.375	150.917	176.833	137.167	167.125	182.958	180.208	136.292
HS_94	1217.33	1510.67	1713	1281.25	1544.5	1386.46	1606.58	1521	1114.25	1691.71	1587.54	1923.88
HS_95	74.5417	73.125	87.125	78.2917	78.2917	82.7917	81	85.5833	78.2917	77.25	92.7917	91.1042
HS_96	9767.33	9341	9901.5	10077.5	9467.42	8944.25	9387.54	9000.63	10139	9130.38	7452.92	9387.54
HS_97	1786.58	1775.38	1553.63	1908.63	1660.13	1378.25	1587.54	1378.25	1678.25	1575.83	1209.38	1281.25
HS_99.1	673.125	805.25	747.917	645.5	801.042	793.083	604	549.708	801.042	697.042	708.625	729.5
hsa-let-7a	28079.2	28079.2	29270.8	28079.2	28079.2	28630.5	28630.5	28079.2	29807	28079.2	27452.7	29270.8
hsa-let-7a*	1951.96	1587.54	1378.25	1510.67	1875.58	1265.71	1670.63	1848.63	751.792	2454.88	2539.25	1895.04
hsa-let-7b	16158.6	15953.4	20137.7	17580	15953.4	18014.5	15764.5	16820.7	20885.9	15075.2	14877.2	19211.4
hsa-let-7b*	11084.5	10139	14532.8	11820.9	9130.38	13360	12913.3	11299.9	15302.7	10985.2	9000.63	10212.5
hsa-let-7c	22202.8	21196.3	23826.3	23079.7	19211.4	22781.3	22075.7	22460	24504.3	22306.3	21504.6	23970.2
hsa-let-7c*	1691.71	1036.79	1908.63	1627.63	805.25	1345.08	1544.5	1217.33	1065.29	1184	1070.38	1184
hsa-let-7d	19643.8	16158.6	21196.3	20318	14031.9	17850.5	19211.4	17077.8	22781.3	15302.7	15302.7	18998.6
hsa-let-7d*	10494	10212.5	12463	10382	8875.5	10853.9	10494	10494	13196.7	9279.17	8244.25	9767.33
hsa-let-7e	24605.3	23079.7	25606.6	25454.9	20885.9	24208.3	23696.1	23970.2	26723.5	23079.7	23362.8	24504.3
hsa-let-7e*	905.125	1272.71	1076.17	832.083	1173.08	1234.33	801.042	1319.79	1041.04	1094.04	1476.83	1094.04
hsa-let-7f	25147.9	24339.8	25454.9	25246.3	23970.2	25036.5	25036.5	24892.9	26033	25147.9	24892.9	25454.9
hsa-let-7f-1*	3040.63	2120.92	1991.92	2640.83	2375.88	2306.42	2355.5	2066.54	1408.92	2039.17	2066.54	1761.13
hsa-let-7f-2*	217.833	301.958	235.708	235.708	274	400.917	267.208	253.042	260.167	182.958	243.042	310.667
hsa-let-7g	26558	26033	26426.8	26915.8	26194.6	26426.8	26308.6	26426.8	26915.8	26558	26558	26915.8
hsa-let-7g*	126.125	95.7917	69.7083	105.792	83.1042	70.625	98.1667	61.375	74.875	70.8333	73.125	83.75
hsa-let-7i	21036.4	19211.4	22592.8	21504.6	17850.5	20465.1	21331	20137.7	22460	19643.8	19643.8	21036.4
hsa-let-7i*	404.5	151.917	119.5	277	109.542	282.167	197.375	84.0417	203.875	81	99.5417	152.5
hsa-miR-1	201.5	183.375	214.333	233.125	198.917	180.208	220.917	255.708	129.708	368.292	350.667	206.583
hsa-miR-100	9234.96	9000.63	7861.13	7986.71	10576.2	7584.58	8339.63	9065.38	7280.75	10212.5	10752.3	8072.42
hsa-miR-100*	319.833	260.167	246.5	282.167	301.958	234.208	192.833	271.125	271.875	292.625	233.125	238.208
hsa-miR-101	788	701.042	625.792	741.125	867.667	599.625	880.792	717.125	645.5	1031.17	1097.75	820.875
hsa-miR-101*	84.8542	78.5	116.208	80.4167	77.125	88.5417	85.4167	102	99.5417	81	79.25	89.25
hsa-miR-103	6682.79	6409.96	6682.79	6409.96	6850.42	6560.21	6682.79	6682.79	7088.46	7049.08	7584.58	7687.54
hsa-miR-105	7396.63	7624.75	7736.21	7341.29	8743.33	8183.92	7926.92	8244.25	6798.54	8743.33	9387.54	9000.63
hsa-miR-105*	218.667	270.333	277	263.792	253.042	310.667	274.917	217.125	283.458	264.792	317.333	299.708
hsa-miR-106a	22592.8	17850.5	16473.1	21893.8	19821.5	15075.2	22781.3	18492.5	18014.5	22781.3	20465.1	15302.7
hsa-miR-106a*	128.625	166.167	140.292	196.75	172.458	180.208	136.292	157.292	143.167	191.458	224.75	132.75
hsa-miR-106a:9.1	1058.92	934.125	1058.92	851.708	934.125	1013.42	1319.79	991.875	1159.67	1103.96	1110.08	886.542
hsa-miR-106b	12053.3	11180.5	10301.3	10752.3	11951.4	9767.33	11572.6	11572.6	10853.9	12316.2	11435.6	11299.9
hsa-miR-106b*	7049.08	8339.63	8522.21	7624.75	10494	8875.5	7280.75	10681.9	7624.75	8406	9682.42	8743.33
hsa-miR-107	1312.04	1145.79	1103.96	1203.42	1328.17	1203.42	1178.75	1397.21	1281.25	1606.58	2172.21	1786.58
hsa-miR-10a	13196.7	14031.9	12316.2	12191.8	14877.2	11084.5	13596.8	13789.9	8944.25	14877.2	15764.5	12591.3
hsa-miR-10a*	3839.71	3718.17	3748.21	3340.33	3718.17	3233.54	3992.58	3869.08	2681.54	4028.33	4220.71	3653
hsa-miR-10b	8457.13	7861.13	6560.21	7280.75	8580.13	6212.92	8944.25	7687.54	5075.33	9767.33	8875.5	7049.08
hsa-miR-10b*	195.083	231.917	206.583	233.125	255.708	218.667	226.5	206.583	162.833	219.542	286.125	192.167
hsa-miR-1178	298.208	272.958	339.333	194.208	185.792	113.292	271.875	199.5	142.542	217.833	211.708	241.083
hsa-miR-1179	92.2083	244.917	271.875	134.75	142.042	341.5	303.167	274	89.25	234.833	337.042	198.917
hsa-miR-1180	3367.17	2977.63	3913.88	3777.79	2481.96	3310.46	3194.67	3109.54	4309.71	3445.71	3529.75	3913.88
hsa-miR-1181	525.208	664.958	979.792	697.042	587.917	780.208	905.125	1145.79	971.5	761.625	722.167	808.708
hsa-miR-1182	148.542	128.958	249.208	107	88.1042	139.417	259.125	92.2083	118.875	97.8542	108.542	68.4583
hsa-miR-1183	330.708	297	473.708	294.583	308.958	483.25	441.875	396.75	388.708	272.958	278.042	295.75
hsa-miR-1184	867.667	759	801.042	937.875	872.583	738.125	909.917	766.958	937.875	815.75	851.708	771
hsa-miR-1185	67.375	54.0417	59.5417	69.25	48.7917	75.1667	95.3333	46	63.75	64.6667	51.3333	55.0417
hsa-miR-1197	376.042	280.125	341.5	344.292	290	250.667	501.667	249.208	259.125	349.833	318.75	209.625
hsa-miR-1200	82.4583	101.25	98.1667	119.875	119.875	75.9167	88.1042	139.417	109.125	114.167	97.2917	148.125
hsa-miR-1201	23696.1	24892.9	24892.9	23970.2	24605.3	25454.9	23826.3	25246.3	24084.6	24892.9	25036.5	25850.5
hsa-miR-1202	310.667	215.167	330.708	332.958	234.833	232.583	300.75	275.917	408.458	256.667	165.625	315.958
hsa-miR-1203	140.833	106.646	82.7917	183.917	170.667	116.667	109.125	167.625	135.417	132.75	125.5	183.375
hsa-miR-1204	1019.92	1053.54	1209.38	1094.04	1065.29	1065.29	1008.71	1114.25	1430.08	1159.67	896.583	1242.71
hsa-miR-1205	292.625	353.417	363.292	335.667	284.333	285.5	294.583	390.25	358.833	271.125	310.667	314.5
hsa-miR-1206	824.208	788	676.167	828.542	815.75	715.25	780.208	668.708	812.125	812.125	604	793.083
hsa-miR-1207-3p	94.1042	89.5833	101.542	89	121.708	90.7083	88.1042	110.292	103.563	86.4583	108.542	97.8542
hsa-miR-1207-5p	952.083	916.083	759	998.167	986.375	855.542	872.583	815.75	880.792	905.125	717.125	896.583
hsa-miR-1208	419	374.667	373.375	435.792	368.292	364.542	429.375	298.208	376.042	395.25	366.958	353.417
hsa-miR-122	345.458	298.208	361.583	381.667	250.042	319.833	330.708	264.792	350.667	267.208	253.042	250.667
hsa-miR-122*	218.667	180.208	193.5	213.875	200.042	187.75	190.958	169.792	182.958	170.667	149.167	152.5
hsa-miR-1224-3p	2355.5	2406.96	2355.5	2584.38	2497.5	2424.58	2481.96	2080.83	2854.54	2355.5	1939.38	2355.5
hsa-miR-1224-5p	468.708	248.167	567.25	419	294.583	342.875	415.583	381.667	896.583	358.833	398.375	544.875
hsa-miR-1225-3p	956.208	1031.17	820.875	1003.75	1087.71	934.125	926.083	1137.29	1031.17	934.125	974.917	1047.54
hsa-miR-1225-5p	192.833	231.917	354.583	325.083	271.875	192.167	438.083	299.708	345.458	252.083	304.75	241.083
hsa-miR-1226	3084.63	2955.88	4626.25	3255.75	2285.04	3913.88	2955.88	3445.71	5123.92	2895.88	2754.38	3445.71
hsa-miR-1226*	991.875	1025.71	1281.25	1036.79	1378.25	1533.79	1303.5	1328.17	1923.88	1058.92	1223.58	1209.38
hsa-miR-1227	3474.38	2824.46	4521.96	4177.5	2195.04	4093.75	3591.08	3084.63	4869.25	3218.21	2640.83	3529.75
hsa-miR-1228	747.917	470.917	448.333	527.583	322.25	387.167	741.125	467.167	360.125	435.792	384	384
hsa-miR-1228*	5235.54	5825.75	6020.25	6020.25	5380.92	6276.46	5235.54	5973.54	6560.21	6560.21	4565.17	6682.79
hsa-miR-1229	1469.42	1229.08	2481.96	1319.79	759	1875.58	1352	1587.54	2406.96	1114.25	1031.17	1691.71
hsa-miR-1231	921.708	1137.29	801.042	1070.38	1229.08	956.208	793.083	851.708	859.25	855.542	796.208	846.5
hsa-miR-1233	1533.79	1678.25	1923.88	1775.38	1564.79	1979.04	1702.04	1801.04	1749.21	1521	1419.5	1544.5
hsa-miR-1234	738.125	751.792	1312.04	1126.29	632.792	1281.25	1234.33	1094.04	1126.29	1053.54	1019.92	1152.79
hsa-miR-1236	279.083	261.792	260.167	347.042	203.375	232.583	157.792	241.083	159.917	223.208	307.375	169.792
hsa-miR-1237	3777.79	3748.21	4869.25	4420.67	3084.63	4349.88	4093.75	4385.83	5534.54	3801.75	2824.46	4028.33
hsa-miR-1238	492.792	563.75	851.708	744.083	390.25	365.958	676.167	496.292	470.917	348.5	744.083	370.125
hsa-miR-124	68.4583	108.208	60.7917	49.4167	124.167	88.5417	84.0417	136.083	84.375	64.6667	70.2917	81.375
hsa-miR-124*	40	37.9583	37.9583	38.5	38.5	36.375	37.9583	35.7083	40	39.125	38.5	34.4583
hsa-miR-1243	599.625	542.958	701.042	615.542	427.708	569.833	529.75	453.542	632.792	557.958	468.708	465.333
hsa-miR-1244	169.083	201.5	177.75	230.125	158.375	144.958	92.5	201.5	225.75	167.625	120.333	180.75
hsa-miR-1245	729.5	805.25	1251.75	867.667	658.833	1132.88	864.042	909.917	1184	793.083	832.083	1025.71
hsa-miR-1246	26308.6	25454.9	27452.7	26426.8	25850.5	26723.5	26194.6	25734.6	27452.7	25606.6	25734.6	26558
hsa-miR-1247	1345.08	1801.04	1848.63	1691.71	1521	2285.04	1837.08	2267.38	1825.25	1489.08	1510.67	1597.33
hsa-miR-1248	330.708	370.125	310.667	361.583	648.792	315.958	390.25	297	404.5	390.25	283.458	432.958
hsa-miR-1249	10681.9	10681.9	11820.9	11951.4	8627.13	11675.5	11180.5	10985.2	13360	10853.9	9065.38	11084.5
hsa-miR-124a:9.1	60.5417	49.4167	66.7917	58.375	47.9167	60.5417	102.583	81.7917	63.75	57.9167	80.7917	49
hsa-miR-1250	190.958	195.542	188.417	233.125	220.917	227.375	218.667	243.042	192.167	215.167	176.833	204.5
hsa-miR-1251	102	89.5833	124.167	72.375	98.5417	68.0417	98.1667	90.7083	72.6667	91.625	85.5833	76.3333
hsa-miR-1252	43.5417	44.2083	46.2917	66.0833	44.2083	45.75	40.3333	47.9167	43.2083	40	46.6667	46.2917
hsa-miR-1253	364.542	290	318.75	335.667	282.167	321.042	341.5	279.083	391.875	312	290.708	304.75
hsa-miR-1254	2618.96	2172.21	2539.25	2824.46	2306.42	2340.79	2681.54	2100.17	2955.88	2481.96	1875.58	2235.75
hsa-miR-1255a	77.125	58.6667	47.9167	59.5417	55.75	66.0833	56.0833	49	49.9167	66.3333	56.25	43.2083
hsa-miR-1255b	451.417	429.375	290.708	432.958	394.042	361.583	350.667	443.25	508.708	398.375	358.833	349.833
hsa-miR-1256	138	131.208	133.875	132.208	133.25	115.167	138.917	113.708	116.208	140.292	140.833	109.833
hsa-miR-1257	1991.92	1670.63	1670.63	1848.63	1430.08	1408.92	1895.04	1627.63	1991.92	1775.38	1575.83	1702.04
hsa-miR-1258	63.75	88.5417	67.5833	57.4167	94.9167	106.646	74.875	94.1042	93.8333	78.5	63.75	80.7917
hsa-miR-1259	209.625	234.833	391.875	364.542	146.625	163.625	290	378.25	231	157.292	160.375	197.375
hsa-miR-125a-3p	934.125	921.708	991.875	909.917	947.625	896.583	1173.08	998.167	1173.08	960.708	1114.25	1110.08
hsa-miR-125a-5p	22306.3	23485.9	24339.8	23231.5	23231.5	24084.6	23079.7	23826.3	24339.8	23485.9	23079.7	24605.3
hsa-miR-125b	24892.9	25246.3	25246.3	24892.9	25454.9	25147.9	25147.9	25036.5	25036.5	25036.5	25850.5	25606.6
hsa-miR-125b-1*	1087.71	986.375	891.333	1008.71	1500.13	1031.17	704.625	1003.75	864.042	971.5	1053.54	876.375
hsa-miR-125b-2*	3558.5	2774.42	2556.54	2655.71	2955.88	3279.83	2878.21	2454.88	2195.04	2440.04	2681.54	2497.5
hsa-miR-126	9467.42	9279.17	9341	9467.42	10681.9	8522.21	9901.5	9767.33	8795.08	10139	10494	9682.42
hsa-miR-126*	9279.17	15764.5	12913.3	8183.92	17077.8	16473.1	11752.5	16158.6	6081.46	14723.4	16473.1	13360
hsa-miR-1260	23485.9	24084.6	23970.2	22781.3	23079.7	24730.9	23970.2	23696.1	22306.3	22916.2	22781.3	22916.2
hsa-miR-1261	323.625	307.375	229.333	347.042	338.042	224.75	295.75	291.667	268.25	335.667	227.375	261.792
hsa-miR-1262	373.375	328.708	297	368.292	310.667	360.125	363.292	283.458	348.5	330.708	274.917	315.958
hsa-miR-1263	241.083	198.917	204.5	237.375	202.208	230.125	220.917	154.375	196	268.25	164.208	208.333
hsa-miR-1264	60.5417	59.5417	60.7917	64.1667	57.25	58.375	60.125	55.75	57.9167	59.0833	60.7917	64.1667
hsa-miR-1265	80.1667	61.0417	127.917	108.208	46.2917	68.0417	96.7083	58.375	69.7083	92.7917	43.2083	76.3333
hsa-miR-1266	65.7917	51.3333	65.375	55.0417	52.375	63.4583	64.6667	51.625	67.5833	51.9167	59.0833	64.1667
hsa-miR-1267	1272.71	1319.79	1065.29	1303.5	1408.92	1070.38	1223.58	1223.58	1137.29	1258.13	1173.08	1145.79
hsa-miR-1268	4255.13	4906.21	5339.13	6323.42	5001.21	6466.67	4565.17	5928.46	7396.63	4065.96	3913.88	5700.38
hsa-miR-1269	121.708	171.333	193.5	118.875	160.917	131.667	161.875	189.75	92.5	149.667	151.917	180.75
hsa-miR-1270	697.042	560.292	1019.92	747.917	467.167	751.792	722.167	747.917	1103.96	606.917	701.042	780.208
hsa-miR-1271	2824.46	2211.38	1786.58	2052	1991.92	2640.83	1786.58	2134.13	2172.21	2066.54	3060.21	2481.96
hsa-miR-1272	494.917	468.708	459.25	451.417	485.083	490.792	480.125	443.25	444.583	505.792	475.75	465.333
hsa-miR-1273	2134.13	1386.46	1801.04	1724.29	1036.79	1647.21	2155.63	1775.38	2878.21	1825.25	1272.71	1587.54
hsa-miR-127-3p	72.375	68.0417	59.5417	73.3333	69.7083	71.4583	78.5	61.375	81	59.0833	59.0833	60.5417
hsa-miR-1274a	23362.8	23826.3	16820.7	23485.9	23362.8	24504.3	23362.8	19961.6	17294.7	23362.8	21331	23826.3
hsa-miR-1274b	17294.7	20885.9	13196.7	15764.5	23826.3	18726.1	16473.1	18726.1	13789.9	21036.4	17580	16473.1
hsa-miR-1275	13083.2	14358.9	14723.4	14216.4	12463	14216.4	14031.9	15509.2	15953.4	11299.9	11572.6	12771.5
hsa-miR-127-5p	40	51.3333	41.2917	45.75	55.75	47.5833	39.125	46	42.3333	44.2083	53.7917	43.2083
hsa-miR-1276	195.083	195.542	165.167	196.75	208.333	177.25	178.542	189.75	173.833	180.208	167.125	165.625
hsa-miR-1277	32.0833	32.9167	33.7917	32.0833	32.0833	32.9167	32.0833	35.7083	32.9167	33.7917	32.0833	32.9167
hsa-miR-1278	227.375	490.792	286.125	235.708	425.583	327.625	308.958	508.708	205.708	478.708	846.5	307.375
hsa-miR-1279	64.4167	61.0417	62.1667	65.375	57.9167	60.5417	67.2083	60.7917	65.0417	63.75	59.0833	60.5417
hsa-miR-128	6850.42	7452.92	7396.63	6682.79	7986.71	7341.29	6276.46	7512.08	7687.54	8339.63	9130.38	8457.13
hsa-miR-1280	27452.7	27452.7	27134.8	27452.7	26915.8	28079.2	27452.7	26915.8	26426.8	27452.7	26723.5	27452.7
hsa-miR-1281	390.25	360.125	332.958	394.042	294.583	201.5	381.667	473.708	304.75	253.042	400.917	271.875
hsa-miR-1282	124.5	98.9583	95.3333	113.708	103.042	97.2917	115.167	108.208	116.208	109.542	134.583	106.646
hsa-miR-1283	80.1667	116.208	88.5417	78.2917	119.875	81.375	86.7708	111.208	72.6667	94.9167	114.75	89.25
hsa-miR-1284	1670.63	1469.42	1436.46	1702.04	1436.46	1460.42	1713	1251.75	1691.71	1637.75	1319.79	1460.42
hsa-miR-1285	8406	11675.5	8795.08	8457.13	13196.7	10301.3	8406	12591.3	8522.21	9341	9234.96	9901.5
hsa-miR-1286	1337.75	1364.38	1173.08	1419.5	1265.71	1114.25	1288.67	1184	1209.38	1319.79	1065.29	1152.79
hsa-miR-1287	544.875	446.417	505.792	496.292	360.125	508.708	563.75	339.333	465.333	544.875	374.667	481.292
hsa-miR-1288	261.792	192.833	279.083	269.25	149.667	257.875	248.167	219.542	304.75	224.75	250.667	280.125
hsa-miR-1289	212.292	192.833	170.208	223.875	172.458	158.375	236.667	152.5	200.75	177.75	156.708	148.125
hsa-miR-128a:9.1	685.542	722.167	704.625	512.958	734.583	604	567.25	864.042	668.708	896.583	1217.33	859.25
hsa-miR-128b:9.1	254.958	234.833	190.625	174.833	195.083	163.625	223.875	194.208	185.125	231	352.25	183.375
hsa-miR-129*	168.333	195.083	250.667	143.167	148.125	196.75	170.667	171.875	178.542	145.333	182.958	225.75
hsa-miR-1290	1476.83	1242.71	5928.46	2977.63	864.042	1328.17	3279.83	3688.88	1786.58	685.542	3839.71	1908.63
hsa-miR-1291	149.667	160.375	299.708	140.833	210.458	109.833	151.542	219.542	180.75	155	200.042	173.292
hsa-miR-1292	200.042	187.208	254.958	196.75	187.208	217.125	205.208	291.667	200.75	160.917	253.042	233.125
hsa-miR-1293	203.375	283.458	212.292	327.625	286.125	214.333	246.5	257.875	275.917	257.875	241.083	278.042
hsa-miR-129-3p	188.417	411.667	384	387.167	395.25	347.042	280.875	546.833	270.333	355.792	438.083	525.208
hsa-miR-1294	668.708	715.25	661.833	623	673.125	618.75	625.792	661.833	641.167	759	726.083	676.167
hsa-miR-1295	310.667	390.25	315.958	241.083	255.708	334.417	314.5	335.667	286.958	280.875	229	402.583
hsa-miR-129-5p	6466.67	5928.46	6466.67	6608.5	6081.46	5632.5	6560.21	5285.25	7512.08	5884.88	5123.92	6081.46
hsa-miR-1296	6020.25	5491.71	3503	5235.54	4177.5	5380.92	5973.54	4065.96	5700.38	3777.79	3367.17	4677.33
hsa-miR-1297	342.875	275.917	254.958	357.667	280.125	275.917	323.625	247.167	319.833	333.708	243.042	325.083
hsa-miR-1298	232.583	189.25	204.5	219.542	188.417	208.333	229	181.292	218.667	205.208	161.875	170.667
hsa-miR-1299	658.833	512.958	516.708	625.792	459.25	544.875	658.833	429.375	520.375	661.833	523.208	510.875
hsa-miR-1300	1627.63	2052	1702.04	3020.75	2454.88	2556.54	1951.96	1908.63	2235.75	1460.42	1670.63	1408.92
hsa-miR-1301	7584.58	7584.58	9000.63	8137.83	6995.63	7861.13	7512.08	8137.83	8339.63	7512.08	7144.83	8137.83
hsa-miR-1302	49.7083	118.333	158.625	64.1667	67.8333	49.4167	59.0833	43.5417	47.0417	84.0417	84.0417	69.375
hsa-miR-1303	3801.75	3869.08	2754.38	3146.96	3869.08	3040.63	4065.96	3419.92	2729.25	4734.08	4093.75	4133.17
hsa-miR-1304	444.583	404.5	483.25	419	396.75	366.958	534.25	499	540.542	374.667	508.708	419
hsa-miR-1305	788	726.083	606.917	788	741.125	641.167	729.5	581.5	820.875	697.042	599.625	722.167
hsa-miR-1307	10077.5	9604.67	8339.63	10853.9	9604.67	10077.5	9767.33	10382	9767.33	10301.3	9467.42	10752.3
hsa-miR-1308	22781.3	22592.8	24730.9	22916.2	22460	23970.2	22460	23362.8	25147.9	22592.8	21715	24339.8
hsa-miR-130a	12771.5	12591.3	13083.2	13196.7	14216.4	12463	11951.4	12913.3	14532.8	13196.7	14216.4	14358.9
hsa-miR-130a*	157.292	196.75	173.833	132.75	238.208	133.25	169.083	173.833	144.958	162.333	189.25	157.792
hsa-miR-130b	12913.3	11435.6	10681.9	12463	11820.9	10139	11435.6	11752.5	11435.6	12771.5	12913.3	12316.2
hsa-miR-130b*	13360	12316.2	13360	13789.9	10853.9	11820.9	12591.3	12053.3	11675.5	12913.3	12463	11675.5
hsa-miR-132	21331	22306.3	23079.7	21196.3	21331	22916.2	21633.3	22075.7	19821.5	21196.3	21893.8	20137.7
hsa-miR-132*	855.542	966.417	788	851.708	1386.46	926.083	828.542	979.792	846.5	966.417	1469.42	971.5
hsa-miR-1321	215.875	163.625	165.167	199.5	154.375	184.542	195.542	156.167	177.75	169.083	161.875	183.375
hsa-miR-1322	625.792	734.583	391.875	579.042	689.25	423.333	715.25	793.083	623	774.625	656.208	692.958
hsa-miR-1323	801.042	793.083	656.208	801.042	886.542	645.5	681.542	783.667	741.125	708.625	704.625	734.583
hsa-miR-1324	97.2917	97.8542	88.5417	94.9167	81.7917	118.875	92.2083	74.5417	131.667	115.875	99.5417	91.1042
hsa-miR-133a	623	604	571.875	575.208	595.458	560.292	571.875	592.25	599.625	645.5	623	623
hsa-miR-133b	159.417	158.625	160.917	150.25	154.375	175.333	144.542	150.917	181.667	141.375	158.375	174.833
hsa-miR-134	171.333	147.583	231	144.958	160.917	208.333	136.292	138	213.125	128.625	158.375	298.208
hsa-miR-135a	256.667	625.792	294.583	256.667	796.208	438.083	250.667	629.5	280.875	470.917	1025.71	385.042
hsa-miR-135a*	288.292	260.167	182.958	283.458	297	187.75	230.125	294.583	270.333	269.25	239.458	217.125
hsa-miR-135b	223.875	208.833	177.75	229	264.792	182.958	189.25	225.75	232.583	205.208	239.458	213.875
hsa-miR-135b*	681.542	744.083	711.667	681.542	747.917	673.125	575.208	701.042	658.833	531.75	556.083	534.25
hsa-miR-136	130.208	116.208	108.542	125.167	115.875	102.583	122.875	104.167	127.125	121.708	103.042	109.833
hsa-miR-136*	68.4583	69.7083	84.0417	66.0833	86.7708	88.5417	69.25	72.375	66.0833	62.5833	84.0417	70.8333
hsa-miR-137	4065.96	9130.38	5380.92	3419.92	13789.9	7986.71	4481.83	7736.21	4065.96	7396.63	11675.5	5928.46
hsa-miR-138	8944.25	7341.29	7584.58	9000.63	8522.21	7144.83	8457.13	8072.42	8072.42	8457.13	8072.42	7396.63
hsa-miR-138-1*	2481.96	2655.71	2134.13	2424.58	2235.75	3040.63	2195.04	2340.79	1553.63	2195.04	3109.54	2340.79
hsa-miR-138-2*	297	228.167	277	301.958	231.917	271.875	280.875	234.208	312	299.708	260.167	291.667
hsa-miR-139-3p	542.958	697.042	508.708	560.292	738.125	796.208	722.167	801.042	587.917	681.542	656.208	681.542
hsa-miR-139-5p	1378.25	1533.79	1242.71	1430.08	1575.83	1047.54	1647.21	1678.25	1510.67	1801.04	1908.63	1575.83
hsa-miR-140-3p	6935.79	6682.79	5187.92	6466.67	6682.79	5825.75	6995.63	6081.46	5825.75	5928.46	6147	6323.42
hsa-miR-140-5p	937.875	1058.92	905.125	841.833	1735.17	971.5	1120.46	1337.75	793.083	1203.42	1352	952.083
hsa-miR-141	147.583	217.125	265.625	148.125	250.042	275.917	214.333	310.667	189.25	308.958	294.583	247.167
hsa-miR-141*	74.5417	76.3333	74.0417	75.1667	71.125	78.0417	78.5	77.125	87.125	73.3333	77.25	79.7083
hsa-miR-142-3p	75.375	91.1042	75.375	78.2917	105.792	82.7917	70.8333	96.1667	71.4583	75.9167	84.0417	85.5833
hsa-miR-142-5p	39.125	39.125	40	36.375	48.7917	38.5	35.7083	43.5417	40	37.9583	94.9167	41.2917
hsa-miR-143	286.125	298.208	274.917	286.958	340.167	268.25	224.75	357.667	263.792	261.792	331.542	254.958
hsa-miR-143*	3109.54	2854.54	2824.46	3109.54	2729.25	2708	3084.63	2519.25	3310.46	2854.54	2100.17	2655.71
hsa-miR-144	94.1042	60.125	76.75	101.25	86.7708	134.583	60.7917	63.4583	63.75	60.125	130.208	64.1667
hsa-miR-144*	118.875	92.5	90.4167	115.875	86.7708	81.375	113.292	79.25	95.3333	115.875	75.1667	105.375
hsa-miR-144:9.1	106.417	110.917	126.5	111.208	117.417	108.208	109.125	113.708	110.292	114.167	114.75	136.292
hsa-miR-145	3419.92	3084.63	3367.17	3503	2999.83	3393.25	3218.21	2918.58	3688.88	3172	2655.71	3503
hsa-miR-145*	225.75	213.125	182.292	223.875	282.167	199.5	214.333	243.792	186.417	244.917	200.042	205.208
hsa-miR-1468	741.125	820.875	1203.42	751.792	612.792	864.042	599.625	1058.92	1087.71	921.708	934.125	1352
hsa-miR-146a	110.917	58.6667	52.9167	87.7083	107.646	51.625	64.6667	73.3333	67.5833	96.1667	124.167	116.208
hsa-miR-146a*	290.708	198.917	261.792	280.125	215.167	239.458	229	194.208	285.5	223.208	168.333	202.917
hsa-miR-146b-3p	205.208	207.542	179.792	198.917	224.75	173.292	192.833	177.75	183.917	212.292	198	201.5
hsa-miR-146b-5p	812.125	1120.46	934.125	774.625	1159.67	937.875	1076.17	1265.71	656.208	1364.38	1801.04	1173.08
hsa-miR-147	60.5417	61.0417	94.1042	67.2083	59.5417	54.3333	73.125	65.0417	128.958	77.25	69.25	62.1667
hsa-miR-147b	891.333	771	676.167	896.583	820.875	734.583	916.083	734.583	778	796.208	681.542	755.625
hsa-miR-148a	7807.21	9682.42	7807.21	6850.42	10985.2	8680.42	7736.21	9467.42	6276.46	9977.33	10985.2	9604.67
hsa-miR-148a*	198.917	174.833	231.917	182.958	299.708	249.208	149.667	203.375	127.125	232.583	341.5	174.833
hsa-miR-148b	17850.5	15075.2	13789.9	14358.9	13596.8	15302.7	14216.4	13360	12316.2	14031.9	14358.9	15764.5
hsa-miR-148b*	365.958	312	348.5	404.5	413.333	334.417	348.5	402.583	441.875	379.875	421.167	390.25
hsa-miR-149	9000.63	9977.33	9176.88	9901.5	9901.5	9977.33	9538.38	10752.3	8580.13	10576.2	10853.9	9538.38
hsa-miR-149*	205.208	215.167	234.208	221.833	211.708	232.583	185.792	201.5	254.958	165.625	217.833	250.667
hsa-miR-150	808.708	783.667	1408.92	697.042	681.542	1120.46	974.917	788	1053.54	717.125	971.5	991.875
hsa-miR-150*	373.375	483.25	339.333	443.25	525.208	487.042	292.625	411.667	510.875	432.958	413.333	523.208
hsa-miR-151:9.1	8072.42	12053.3	9767.33	8072.42	12771.5	11180.5	9467.42	11675.5	6682.79	11180.5	12591.3	8680.42
hsa-miR-151-3p	10212.5	13789.9	11180.5	9832.13	16473.1	12053.3	10382	12771.5	9682.42	12191.8	12771.5	10494
hsa-miR-151-5p	22916.2	22916.2	22460	22306.3	22592.8	21633.3	22202.8	23231.5	20465.1	23696.1	23231.5	21715
hsa-miR-152	2955.88	3529.75	3255.75	2895.88	3310.46	3084.63	2977.63	3310.46	2999.83	3591.08	4677.33	3419.92
hsa-miR-153	5700.38	9901.5	7512.08	4950.33	10212.5	9065.38	7219.79	9901.5	1660.13	9538.38	11180.5	6995.63
hsa-miR-1537	142.542	124.167	113.292	132.75	129.708	125.167	120.583	114.75	106.417	122.875	151.917	118.875
hsa-miR-154	55.0417	73.125	54.0417	55.0417	61.375	55.3333	56.0833	75.375	53.4167	91.625	70.2917	62.1667
hsa-miR-154*	82.4583	83.75	69.7083	85.9583	85.5833	78.875	89.9167	73.3333	72.6667	91.625	103.042	83.75
hsa-miR-155	876.375	766.958	872.583	942.375	788	812.125	838.125	744.083	1013.42	726.083	692.958	841.833
hsa-miR-155*	63.0417	62.5833	63.4583	59.5417	67.8333	66.0833	66.0833	63.4583	66.7917	67.8333	73.125	72.375
hsa-miR-15a	5632.5	6081.46	4309.71	4869.25	7584.58	4906.21	5491.71	5884.88	5380.92	6409.96	7396.63	5632.5
hsa-miR-15a*	146.125	103.042	124.167	102.583	100.167	134.583	127.917	102	140.833	74.875	89.9167	79.7083
hsa-miR-15b	19211.4	20465.1	21504.6	20137.7	19643.8	21504.6	19821.5	19821.5	21196.3	20318	20720.8	21633.3
hsa-miR-15b*	11299.9	11299.9	11084.5	11180.5	11180.5	10681.9	10212.5	10853.9	9387.54	11435.6	11299.9	10985.2
hsa-miR-16	20885.9	21633.3	18998.6	18998.6	21715	20318	20137.7	20885.9	17850.5	20885.9	22306.3	19961.6
hsa-miR-16-1*	461.042	411.667	542.958	427.708	421.167	503.375	385.042	427.708	534.25	510.875	553.583	520.375
hsa-miR-16-2*	9901.5	9176.88	9977.33	9341	9279.17	9130.38	8875.5	8944.25	7049.08	9832.13	9832.13	8339.63
hsa-miR-17	16473.1	13196.7	14216.4	14877.2	14723.4	12316.2	17077.8	14216.4	14877.2	14532.8	13789.9	13596.8
hsa-miR-17*	1939.38	1476.83	1258.13	1521	1272.71	1296.58	1597.33	1167.71	1251.75	1553.63	1337.75	1296.58
hsa-miR-17-5p:9.1	2066.54	1553.63	1575.83	1884.08	1647.21	1352	2080.83	1735.17	1761.13	2729.25	2375.88	1670.63
hsa-miR-181a	864.042	1408.92	886.542	934.125	1627.63	1436.46	867.667	1386.46	947.625	1288.67	1724.29	1312.04
hsa-miR-181a*	1386.46	1203.42	1110.08	1449.96	1178.75	1103.96	1364.38	956.208	1303.5	1328.17	886.542	1203.42
hsa-miR-181a-2*	2708	3621	3310.46	2681.54	3801.75	3419.92	2999.83	3777.79	2955.88	3718.17	4420.67	3801.75
hsa-miR-181b	3340.33	4255.13	4677.33	4133.17	4420.67	4177.5	4133.17	4626.25	4481.83	4133.17	5380.92	4521.96
hsa-miR-181c	571.875	886.542	441.875	595.458	909.917	788	501.667	778	544.875	755.625	966.417	909.917
hsa-miR-181c*	410.042	411.667	290.708	339.333	348.5	461.042	353.417	352.25	387.167	381.667	560.292	417.125
hsa-miR-181d	213.875	280.125	330.708	334.417	263	313.042	278.042	290	322.25	247.167	569.833	321.042
hsa-miR-182	20465.1	21036.4	21893.8	19643.8	20137.7	22075.7	20318	20720.8	21633.3	20465.1	20885.9	21893.8
hsa-miR-182*	1647.21	1564.79	1337.75	1159.67	1691.71	1660.13	1251.75	1597.33	979.792	1430.08	1951.96	1489.08
hsa-miR-1825	275.917	200.042	181.292	219.542	213.875	205.208	212.292	228.167	232.583	217.833	208.333	187.75
hsa-miR-1826	14358.9	13360	16158.6	16158.6	10139	13196.7	15953.4	14031.9	15509.2	11572.6	9767.33	11820.9
hsa-miR-1827	85.9583	77.4583	81	94.9167	80.4167	77.125	88.1042	68.4583	84.375	91.625	91.625	76.3333
hsa-miR-183	22075.7	18492.5	22781.3	22075.7	14532.8	18492.5	21715	18014.5	19961.6	20137.7	17294.7	20465.1
hsa-miR-183*	2556.54	2539.25	3340.33	2519.25	1837.08	2824.46	2519.25	2235.75	1875.58	2584.38	2406.96	2999.83
hsa-miR-184	34.4583	30.5	34.4583	34.4583	32.0833	36.375	35.7083	32.9167	38.5	32.9167	35.7083	40
hsa-miR-185	17580	14532.8	15075.2	17294.7	15764.5	13789.9	17294.7	15764.5	18492.5	15509.2	15509.2	14723.4
hsa-miR-185*	1884.08	1110.08	846.5	1460.42	1082.25	1489.08	1203.42	1288.67	1337.75	1082.25	1460.42	1500.13
hsa-miR-186	9387.54	9467.42	6798.54	9130.38	10301.3	7452.92	9130.38	9682.42	7584.58	9176.88	10077.5	8406
hsa-miR-186*	387.167	435.792	301.958	342.875	473.708	270.333	286.125	374.667	279.083	314.5	408.458	341.5
hsa-miR-187	269.25	256.667	290.708	215.875	271.875	321.042	274	286.125	391.875	341.5	371.542	358.833
hsa-miR-187*	349.833	487.042	499	365.958	520.375	480.125	446.417	417.125	340.167	457.5	365.958	423.333
hsa-miR-188-3p	215.875	263	146.125	189.25	233.125	164.625	179.792	236.667	194.208	234.833	161.875	254.042
hsa-miR-188-5p	1837.08	1749.21	1619.04	2066.54	2134.13	1637.75	1678.25	2247.33	1951.96	1923.88	2120.92	1837.08
hsa-miR-189:9.1	1120.46	1223.58	1167.71	1076.17	1167.71	1251.75	1159.67	921.708	1152.79	1110.08	1265.71	1013.42
hsa-miR-18a	4677.33	8244.25	4133.17	3913.88	9682.42	4565.17	5285.25	6323.42	3340.33	5825.75	7861.13	4385.83
hsa-miR-18a*	11435.6	10301.3	9234.96	11084.5	9538.38	10382	10681.9	10301.3	9467.42	8522.21	8627.13	9176.88
hsa-miR-18b	1825.25	3340.33	1660.13	1564.79	4806.33	2211.38	2267.38	2375.88	1500.13	2211.38	3194.67	1724.29
hsa-miR-18b*	1159.67	1619.04	1419.5	1094.04	1364.38	1923.88	1019.92	1713	1094.04	1312.04	1702.04	1476.83
hsa-miR-190	503.375	525.208	463.375	501.667	553.583	463.375	463.375	540.542	480.125	501.667	592.25	478.708
hsa-miR-190b	846.5	900.083	1979.04	867.667	668.708	1192.75	966.417	1159.67	1939.38	766.958	905.125	1097.75
hsa-miR-191	29270.8	28630.5	25850.5	29807	28630.5	25606.6	29270.8	28630.5	25734.6	29270.8	29270.8	27134.8
hsa-miR-191*	689.25	1281.25	1386.46	801.042	1288.67	1691.71	755.625	1258.13	701.042	1120.46	1288.67	1097.75
hsa-miR-192	2195.04	3992.58	2080.83	2007.88	5491.71	2754.38	2340.79	3591.08	1801.04	2955.88	3952.42	2556.54
hsa-miR-192*	100.083	106.646	75.375	86.7708	125.5	95.3333	84.0417	115.875	116.208	103.042	143.792	111.208
hsa-miR-193a-3p	2424.58	1114.25	661.833	979.792	1070.38	1173.08	1047.54	1031.17	755.625	886.542	1094.04	1120.46
hsa-miR-193a-5p	23231.5	20318	24084.6	24504.3	17580	21036.4	24504.3	22592.8	23970.2	21715	18014.5	20318
hsa-miR-193b	25454.9	25147.9	24504.3	25606.6	25246.3	26033	25246.3	24730.9	25606.6	25246.3	24730.9	24730.9
hsa-miR-193b*	7452.92	5339.13	8244.25	8339.63	4481.83	6020.25	6147	4950.33	8183.92	4349.88	3777.79	4734.08
hsa-miR-194	1713	2235.75	1587.54	1345.08	3558.5	1553.63	1939.38	2285.04	1619.04	2285.04	2918.58	1469.42
hsa-miR-194*	2211.38	2355.5	2052	2247.33	2340.79	1801.04	2235.75	1923.88	2134.13	2247.33	1775.38	1991.92
hsa-miR-195	2918.58	2729.25	2440.04	1875.58	3367.17	2454.88	2854.54	2424.58	1575.83	3839.71	4950.33	3040.63
hsa-miR-195*	747.917	606.917	741.125	717.125	689.25	623	664.958	569.833	697.042	689.25	805.25	618.75
hsa-miR-196a	19453.6	18014.5	22075.7	19961.6	18492.5	20720.8	19643.8	19211.4	22916.2	18998.6	18726.1	21504.6
hsa-miR-196a*	475.75	492.792	363.292	525.208	629.5	534.25	304.75	459.25	838.125	419	629.5	664.958
hsa-miR-196b	1430.08	1288.67	1319.79	1476.83	1217.33	1094.04	1328.17	1288.67	1288.67	1378.25	1167.71	1229.08
hsa-miR-197	25850.5	25850.5	26194.6	25850.5	23696.1	26194.6	26033	25454.9	26308.6	25734.6	24605.3	25246.3
hsa-miR-198	110.292	100.083	51.3333	120.333	64.4167	52.9167	95.3333	98.1667	120.583	143.167	56.25	73.125
hsa-miR-199a*:9.1	25734.6	25606.6	19821.5	24605.3	26723.5	19821.5	26558	25606.6	18726.1	26723.5	27134.8	22781.3
hsa-miR-199a-3p,hsa-miR-199b-3p	18492.5	19961.6	19643.8	18014.5	20720.8	18998.6	18726.1	18998.6	17580	19453.6	19453.6	19821.5
hsa-miR-199a-5p	23079.7	23696.1	21331	24339.8	25036.5	19643.8	22916.2	24339.8	20720.8	24208.3	24504.3	22592.8
hsa-miR-199b-5p	325.083	483.25	421.167	390.25	880.792	317.333	529.75	722.167	247.167	540.542	1082.25	592.25
hsa-miR-19a	1070.38	998.167	645.5	629.5	926.083	510.875	1126.29	846.5	900.083	1217.33	1328.17	766.958
hsa-miR-19a*	59.5417	127.917	44.2083	63.0417	90.7083	90.7083	45.75	68.4583	56.7083	48.7917	48.25	45.3333
hsa-miR-19b	4385.83	3393.25	3718.17	4093.75	3653	1863.33	4309.71	3839.71	4626.25	5123.92	4626.25	4220.71
hsa-miR-19b-1*	144.958	154.375	154.375	136.083	179.792	128.958	106.417	119.875	113.292	115.167	131.208	111.208
hsa-miR-19b-2*	604	501.667	531.75	549.708	538.792	423.333	567.25	463.375	480.125	563.75	468.708	435.792
hsa-miR-200a	69.7083	64.1667	90.4167	85.4167	73.3333	58.375	80.1667	81.7917	82.7917	96.1667	127.583	114.167
hsa-miR-200a*	107.646	103.042	116.208	90.4167	122.875	95.3333	117.417	106.646	77.125	82.7917	105.375	100.167
hsa-miR-200b	575.208	652.292	729.5	465.333	604	557.958	652.292	606.917	499	801.042	1008.71	726.083
hsa-miR-200b*	260.167	201.5	162.333	260.167	205.208	250.667	270.333	222.583	156.708	207.542	249.208	229.333
hsa-miR-200c	5534.54	5285.25	8580.13	6147	3992.58	6995.63	6212.92	5825.75	7341.29	6147	6798.54	8303.67
hsa-miR-200c*	307.375	319.833	337.042	288.292	341.5	463.375	395.25	384	347.042	339.333	348.5	341.5
hsa-miR-202	144.542	181.292	158.625	150.25	165.167	169.083	138	147.167	137.167	162.333	174.375	142.542
hsa-miR-202*	230.125	205.708	213.125	247.167	191.458	208.333	230.125	167.125	237.375	236.667	214.333	187.208
hsa-miR-202*:9.1	170.208	221.833	413.333	237.375	196.75	268.25	330.708	301.958	432.958	213.875	253.042	264.792
hsa-miR-203	1097.75	1923.88	1863.33	1192.75	1979.04	1825.25	1775.38	1691.71	909.917	2120.92	2424.58	1564.79
hsa-miR-204	1460.42	1337.75	1460.42	1364.38	1192.75	1296.58	1449.96	1087.71	1364.38	1469.42	1132.88	1364.38
hsa-miR-205	234.208	211.708	203.375	230.125	215.167	220.917	334.417	182.958	263.792	238.667	211.708	238.208
hsa-miR-206	652.292	632.792	610.333	606.917	652.292	490.792	587.917	557.958	527.583	579.042	481.292	503.375
hsa-miR-208a	68.4583	48.7917	51.3333	54.0417	46.2917	48.25	50.2917	51.625	50.75	69.375	51.3333	47.9167
hsa-miR-208b	162.833	150.917	176.833	160.375	152.5	146.125	166.167	119.875	159.917	166.167	131.208	145.333
hsa-miR-20a	24339.8	23970.2	23362.8	24084.6	24892.9	22592.8	24605.3	24208.3	23079.7	24730.9	23970.2	22202.8
hsa-miR-20a*	520.375	947.625	599.625	544.875	937.875	722.167	595.458	641.167	406.917	490.792	610.333	487.042
hsa-miR-20b	21504.6	18998.6	19211.4	21633.3	22781.3	16820.7	21893.8	22916.2	19211.4	23231.5	23485.9	18492.5
hsa-miR-20b*	8522.21	7219.79	6409.96	7512.08	7624.75	6748.96	7584.58	7219.79	7926.92	6466.67	6323.42	6608.5
hsa-miR-21	28630.5	29270.8	29807	28630.5	29270.8	29807	29807	29270.8	29270.8	29807	29807	29807
hsa-miR-21*	2454.88	1258.13	1364.38	1979.04	1031.17	1908.63	1875.58	808.708	1510.67	778	759	979.792
hsa-miR-210	5001.21	3255.75	2285.04	4481.83	2854.54	3777.79	4626.25	2539.25	5187.92	3952.42	3255.75	5187.92
hsa-miR-211	78.2917	87.375	105.792	80.4167	78.2917	73.3333	77.25	89	77.125	81	77.25	80.7917
hsa-miR-212	2155.63	2497.5	2454.88	2172.21	2389.63	2267.38	2134.13	2797.92	1813.42	2134.13	2878.21	2267.38
hsa-miR-214	27134.8	26915.8	28079.2	27134.8	27134.8	27134.8	27134.8	27134.8	28079.2	26915.8	26915.8	28079.2
hsa-miR-214*	6521.08	5123.92	5075.33	5534.54	6409.96	4626.25	5632.5	5440.54	6020.25	5380.92	5440.54	4950.33
hsa-miR-215	711.667	1167.71	629.5	632.792	1312.04	759	636.458	952.083	692.958	1036.79	1203.42	824.208
hsa-miR-216a	560.292	457.5	549.708	494.917	441.875	512.958	538.792	726.083	525.208	492.792	503.375	579.042
hsa-miR-216b	1606.58	1786.58	2039.17	1923.88	1587.54	1848.63	1749.21	1786.58	2007.88	1660.13	1660.13	1825.25
hsa-miR-217	84.8542	77.4583	78.0417	87.7083	111.833	82.0417	104.167	87.125	99.5417	93.8333	88.5417	93.8333
hsa-miR-218	14532.8	17294.7	20465.1	14723.4	17294.7	19961.6	15509.2	17294.7	14216.4	16473.1	17850.5	19643.8
hsa-miR-218-1*	1041.04	1094.04	812.125	1019.92	1242.71	824.208	774.625	838.125	1025.71	838.125	1003.75	998.167
hsa-miR-218-2*	132.75	108.208	82.0417	104.625	105.792	93.4792	115.167	124.167	125.5	100.688	124.167	112.833
hsa-miR-219-1-3p	394.042	381.667	512.958	406.917	286.125	350.667	487.042	371.542	384	342.875	408.458	396.75
hsa-miR-219-2-3p	222.583	215.167	179.792	223.875	219.542	195.542	195.542	171.875	208.333	177.75	204.5	156.167
hsa-miR-219-5p	230.125	303.167	223.875	219.542	315.958	160.917	164.625	158.625	99.5417	159.417	280.875	291.667
hsa-miR-22	9977.33	9832.13	6323.42	8406	11299.9	6850.42	8580.13	8875.5	6748.96	9467.42	10301.3	8627.13
hsa-miR-22*	3952.42	4028.33	3172	3992.58	5235.54	4255.13	3419.92	4133.17	3748.21	5001.21	6212.92	4906.21
hsa-miR-220a	468.708	342.875	457.5	322.25	330.708	278.042	313.042	339.333	439.917	370.125	280.875	394.042
hsa-miR-220b	326.5	503.375	263	345.458	373.375	263	390.25	523.208	365.958	480.125	494.917	612.792
hsa-miR-220c	326.5	350.667	332.958	291.667	303.167	395.25	325.083	349.833	370.125	304.75	291.667	402.583
hsa-miR-221	25246.3	25036.5	24208.3	25147.9	26033	23362.8	24892.9	26033	24605.3	26194.6	26308.6	25147.9
hsa-miR-221*	4481.83	4626.25	3109.54	4521.96	5973.54	4065.96	4806.33	5235.54	2481.96	6323.42	6521.08	4565.17
hsa-miR-222	24504.3	24504.3	24605.3	24730.9	24730.9	24605.3	24339.8	25147.9	24892.9	24339.8	24339.8	25036.5
hsa-miR-222*	979.792	761.625	808.708	952.083	838.125	820.875	689.25	648.792	815.75	673.125	636.458	512.958
hsa-miR-223	439.917	478.708	453.542	461.042	508.708	459.25	470.917	549.708	618.75	592.25	475.75	623
hsa-miR-223*	138	97.8542	108.542	98.5417	101.542	106.646	96.7083	105.375	113.292	78.5	103.042	102
hsa-miR-224	8795.08	9065.38	10077.5	9176.88	7736.21	9467.42	9604.67	10139	8137.83	11084.5	10681.9	11180.5
hsa-miR-23a	25606.6	26194.6	25734.6	25036.5	26308.6	25734.6	25734.6	25850.5	25454.9	26033	26194.6	26426.8
hsa-miR-23a*	6409.96	5235.54	7624.75	7396.63	4255.13	5700.38	5884.88	6935.79	10382	5075.33	3748.21	5884.88
hsa-miR-23b	15953.4	17580	17580	17077.8	16158.6	17294.7	16820.7	18240.9	14358.9	19961.6	20318	17580
hsa-miR-23b*	1082.25	673.125	1234.33	1103.96	556.083	942.375	1167.71	1103.96	1735.17	909.917	998.167	1087.71
hsa-miR-24	24084.6	24605.3	23696.1	22592.8	25734.6	24339.8	23485.9	24605.3	22202.8	24605.3	25147.9	24208.3
hsa-miR-24-1*	295.75	355.792	342.875	268.25	455.5	303.167	256.667	337.042	176.167	318.75	515.042	284.333
hsa-miR-24-2*	3688.88	4177.5	3279.83	3621	5700.38	3839.71	3801.75	4028.33	3233.54	3992.58	3992.58	3279.83
hsa-miR-25	26033	26308.6	26308.6	26033	26426.8	26558	25606.6	26558	26194.6	26308.6	26426.8	26723.5
hsa-miR-25*	10301.3	8627.13	10212.5	10576.2	7088.46	9682.42	9832.13	8580.13	11752.5	6935.79	6409.96	7624.75
hsa-miR-26a	19961.6	22460	20318	19453.6	22306.3	20137.7	20465.1	21893.8	19453.6	22075.7	22202.8	20720.8
hsa-miR-26a-1*	164.625	304.75	431.208	191.458	503.375	404.5	254.042	468.708	229	494.917	751.792	250.667
hsa-miR-26a-2*	1449.96	1837.08	1476.83	1145.79	2007.88	1489.08	1184	1510.67	501.667	2155.63	1923.88	1234.33
hsa-miR-26b	21715	21893.8	22306.3	21331	22202.8	21331	21504.6	22306.3	21331	22460	22592.8	23079.7
hsa-miR-26b*	5380.92	5632.5	6081.46	6212.92	5285.25	6147	5123.92	5700.38	4093.75	5973.54	6608.5	5534.54
hsa-miR-27a	23970.2	24730.9	23485.9	23362.8	25606.6	23696.1	23231.5	24504.3	23696.1	24084.6	25454.9	23696.1
hsa-miR-27a*	5928.46	5591.04	6147	6081.46	5534.54	5751.04	6323.42	6081.46	6212.92	5700.38	5825.75	5235.54
hsa-miR-27b	18726.1	19643.8	17077.8	17850.5	22075.7	17077.8	18014.5	19453.6	16820.7	19211.4	21633.3	17294.7
hsa-miR-27b*	2039.17	1908.63	2120.92	1991.92	2247.33	1619.04	2454.88	2355.5	2389.63	1875.58	2039.17	1813.42
hsa-miR-28-3p	6323.42	6020.25	5973.54	6276.46	6608.5	5491.71	6850.42	6276.46	6276.46	7219.79	7280.75	6850.42
hsa-miR-28-5p	9130.38	8406	8875.5	8627.13	9234.96	7624.75	9234.96	9176.88	9176.88	9387.54	10382	10139
hsa-miR-296-3p	7088.46	6850.42	8303.67	8875.5	5884.88	6682.79	6935.79	7049.08	9130.38	6682.79	5928.46	8183.92
hsa-miR-296-5p	11180.5	9767.33	6850.42	11572.6	8183.92	10752.3	10853.9	7584.58	10494	8303.67	6748.96	9234.96
hsa-miR-297	465.333	455.5	358.833	468.708	494.917	371.542	413.333	385.042	465.333	425.583	378.25	402.583
hsa-miR-298	942.375	937.875	909.917	1041.04	841.833	1097.75	1097.75	771	998.167	872.583	729.5	1003.75
hsa-miR-299-3p	396.75	371.542	481.292	431.208	370.125	457.5	461.042	363.292	515.042	384	352.25	410.042
hsa-miR-299-5p	230.125	156.708	149.667	174.833	148.125	184.542	157.792	140.292	176.167	162.333	151.917	145.333
hsa-miR-29a	20318	21715	21633.3	20720.8	21633.3	22202.8	20720.8	21633.3	21036.4	21331	22075.7	23231.5
hsa-miR-29a*	4521.96	4950.33	4806.33	5075.33	5928.46	7088.46	5187.92	5187.92	5491.71	5751.04	6276.46	6147
hsa-miR-29b	7144.83	7396.63	5123.92	5700.38	7687.54	6409.96	7144.83	6560.21	5928.46	7736.21	8944.25	7144.83
hsa-miR-29b-1*	13596.8	11951.4	15953.4	15953.4	10752.3	13596.8	13083.2	11820.9	15764.5	10681.9	9977.33	12463
hsa-miR-29b-2*	368.292	342.875	467.167	415.583	408.458	421.167	417.125	531.75	419	463.375	664.958	425.583
hsa-miR-29c	4093.75	6276.46	3419.92	3084.63	8072.42	3869.08	4349.88	5001.21	2824.46	5534.54	6935.79	4255.13
hsa-miR-29c*	2584.38	2424.58	2618.96	2774.42	2681.54	2052	2708	2854.54	2754.38	2977.63	2977.63	2406.96
hsa-miR-300	267.208	286.125	200.75	253.042	337.042	237.375	238.667	304.75	230.125	290	290	229.333
hsa-miR-301a	2539.25	2454.88	2340.79	2440.04	2406.96	2235.75	2640.83	2155.63	2618.96	2640.83	2007.88	2306.42
hsa-miR-301b	32.0833	34.4583	43.5417	32.0833	35	34.4583	35	32.9167	36.375	33.7917	32.9167	34.4583
hsa-miR-302a	73.3333	98.9583	81	76.75	105.792	148.542	89.9167	130.208	73.3333	124.5	126.5	84.375
hsa-miR-302a*	177.25	219.542	209.625	170.667	202.208	239.458	178.542	177.75	171.875	189.25	244.917	185.792
hsa-miR-302b	238.208	217.125	233.125	211.708	177.75	243.792	246.5	183.917	198	295.75	220.917	295.75
hsa-miR-302b*	966.417	855.542	966.417	1065.29	891.333	916.083	947.625	793.083	991.875	942.375	771	864.042
hsa-miR-302c	75.375	98.9583	74.0417	75.1667	83.1042	73.3333	70.8333	79.25	70.8333	66.3333	71.125	70.8333
hsa-miR-302c*	388.708	355.792	352.25	399.75	365.958	334.417	370.125	342.875	371.542	366.958	261.792	339.333
hsa-miR-302d	400.917	394.042	379.875	446.417	387.167	408.458	398.375	354.583	399.75	446.417	360.125	378.25
hsa-miR-302d*	124.5	158.625	173.833	127.583	170.667	118.875	133.875	156.167	125.5	149.667	168.333	136.292
hsa-miR-302e	45.75	43.2083	41.2917	42.3333	43.2083	40	45.75	37.0833	62.5833	46.6667	40.8333	46.2917
hsa-miR-302f	30.5	30.5	30.5	30.5	32.0833	28.9167	30.5	32.9167	30.5	30.5	30.5	30.5
hsa-miR-30a	7341.29	8072.42	6608.5	7088.46	8944.25	7396.63	7687.54	7624.75	6521.08	7986.71	9341	7584.58
hsa-miR-30a*	11675.5	11572.6	14031.9	12053.3	11084.5	11752.5	12191.8	12463	11084.5	13083.2	13083.2	12913.3
hsa-miR-30b	10985.2	10077.5	10301.3	10494	10077.5	9279.17	10985.2	10576.2	10212.5	12463	12316.2	10681.9
hsa-miR-30b*	268.25	238.208	184.542	318.75	260.167	214.333	231.917	349.833	385.042	254.958	271.125	326.5
hsa-miR-30c	23826.3	23231.5	23231.5	22460	23485.9	22306.3	22592.8	23485.9	23485.9	23826.3	24208.3	23362.8
hsa-miR-30c-1*	2774.42	4420.67	4565.17	2556.54	3503	4420.67	3748.21	3718.17	4565.17	2424.58	2481.96	2918.58
hsa-miR-30c-2*	1251.75	1296.58	1564.79	1386.46	1469.42	1364.38	1272.71	1660.13	1908.63	1397.21	1837.08	1606.58
hsa-miR-30d	22460	18726.1	17294.7	23696.1	20137.7	18240.9	24084.6	17580	18240.9	22202.8	20137.7	16820.7
hsa-miR-30d*	1660.13	1597.33	1606.58	1837.08	1895.04	1419.5	1619.04	1863.33	1544.5	1749.21	1691.71	1521
hsa-miR-30e	3621	4565.17	2918.58	2729.25	5825.75	3621	3474.38	3992.58	3040.63	4220.71	5187.92	3194.67
hsa-miR-30e*	15509.2	16820.7	18240.9	16820.7	19453.6	16158.6	18492.5	21504.6	14723.4	21893.8	22916.2	17077.8
hsa-miR-31	947.625	891.333	1003.75	876.375	1209.38	998.167	960.708	971.5	926.083	1036.79	1312.04	1132.88
hsa-miR-31*	400.917	404.5	399.75	448.333	461.042	307.375	264.792	439.917	221.833	319.833	531.75	490.792
hsa-miR-32	109.542	120.333	129.708	80.4167	121.708	106.646	110.917	136.083	102	144.542	180.208	121.708
hsa-miR-32*	1837.08	1065.29	1303.5	1489.08	1152.79	1008.71	1979.04	1408.92	1094.04	2267.38	1991.92	1345.08
hsa-miR-320d,hsa-miR-320b,hsa-miR-320a,hsa-miR-320c	26194.6	25734.6	26558	26194.6	25147.9	26308.6	25454.9	26194.6	26558	25454.9	25246.3	26308.6
hsa-miR-323-3p	160.375	178.542	223.208	192.833	189.75	173.292	185.792	244.917	129.708	164.625	431.208	179.125
hsa-miR-323-5p	131.667	126.5	113.292	113.292	138.917	135.417	116.208	127.583	151.917	127.583	130.208	111.208
hsa-miR-324-3p	12316.2	12771.5	11675.5	13083.2	12591.3	12913.3	12053.3	13083.2	12053.3	13360	13360	13196.7
hsa-miR-324-5p	10752.3	8875.5	12191.8	10212.5	7861.13	10576.2	12771.5	9387.54	11820.9	8743.33	9901.5	9832.13
hsa-miR-325	333.708	291.667	350.667	340.167	271.875	299.708	317.333	241.083	299.708	292.625	236.667	271.875
hsa-miR-326	2120.92	2481.96	2195.04	2285.04	2267.38	3218.21	1923.88	2440.04	2584.38	2306.42	2355.5	2774.42
hsa-miR-328	8339.63	8522.21	7049.08	8303.67	6276.46	8580.13	8627.13	7986.71	7144.83	8875.5	8406	8580.13
hsa-miR-329	152.958	198	175.333	124.167	160.917	174.375	177.75	148.125	149.667	156.167	249.208	169.083
hsa-miR-330-3p	2007.88	2080.83	2080.83	2155.63	2026.13	2195.04	2080.83	2195.04	1884.08	2681.54	2854.54	2454.88
hsa-miR-330-5p	361.583	365.958	237.375	301.958	828.542	379.875	340.167	581.5	337.042	453.542	711.667	446.417
hsa-miR-331-3p	10139	8183.92	8627.13	10139	6935.79	10212.5	9977.33	6560.21	12191.8	9682.42	6682.79	11951.4
hsa-miR-331-5p	435.792	448.333	425.583	461.042	501.667	478.708	455.5	505.792	417.125	468.708	536.375	413.333
hsa-miR-335	1606.58	1419.5	1895.04	1597.33	1553.63	1670.63	1564.79	1553.63	2267.38	1979.04	1825.25	1735.17
hsa-miR-335*	1544.5	1352	2319.33	1749.21	1281.25	1521	1991.92	1702.04	1430.08	2774.42	3084.63	1951.96
hsa-miR-337:9.1	58.375	54.0417	60.7917	71.9583	74.875	58.375	69.7083	55.75	90.7083	57.9167	80.7917	68.4583
hsa-miR-337-3p	161.875	128.958	170.208	102.583	129.708	113.292	125.5	117.875	169.792	160.917	192.167	193.5
hsa-miR-337-5p	89.5833	91.1042	82.0417	92.2083	89	85.5833	86.7708	81.7917	85.5833	85.5833	94.9167	79.7083
hsa-miR-338-3p	154.375	153.792	143.792	170.667	157.292	128.958	246.5	146.125	192.167	286.125	368.292	225.75
hsa-miR-338-5p	174.833	136.292	179.792	160.375	131.667	144.542	160.375	128.625	153.792	153.792	120.333	141.375
hsa-miR-339-3p	1251.75	1178.75	587.917	966.417	1319.79	1103.96	1065.29	1152.79	966.417	891.333	1229.08	934.125
hsa-miR-339-5p	13789.9	11820.9	10853.9	13596.8	9065.38	14358.9	13196.7	9234.96	16158.6	9604.67	7807.21	12053.3
hsa-miR-33a	353.417	228.167	196	211.708	243.042	314.5	299.708	286.958	365.958	387.167	211.708	366.958
hsa-miR-33a*	563.75	421.167	501.667	523.208	378.25	408.458	525.208	322.25	448.333	494.917	337.042	394.042
hsa-miR-33b	65.7917	82.0417	96.1667	70.2917	71.125	77.125	67.2083	68.4583	100.688	93.8333	85.5833	73.125
hsa-miR-33b*	284.333	331.542	247.167	245.625	344.292	332.958	203.875	299.708	275.917	373.375	286.125	306.208
hsa-miR-340	1265.71	1449.96	1223.58	1132.88	1619.04	801.042	1500.13	1352	828.542	2406.96	2285.04	1378.25
hsa-miR-340*	1749.21	2389.63	2389.63	1533.79	2584.38	2355.5	1863.33	2729.25	1352	2556.54	3393.25	2052
hsa-miR-342-3p	12463	10985.2	10494	11752.5	9341	11572.6	11820.9	9977.33	10985.2	10494	10212.5	10853.9
hsa-miR-342-5p	2797.92	2285.04	3688.88	3445.71	1908.63	2774.42	2895.88	2618.96	4906.21	2172.21	2247.33	2797.92
hsa-miR-345	427.708	431.208	370.125	396.75	429.375	394.042	363.292	423.333	355.792	396.75	540.542	499
hsa-miR-345:9.1	1959.25	1825.25	1647.21	1813.42	2080.83	1575.83	1691.71	1939.38	1533.79	1908.63	2052	1884.08
hsa-miR-346	1923.88	1761.13	2306.42	1939.38	1137.29	2066.54	1959.25	1564.79	2375.88	1713	1637.75	1875.58
hsa-miR-34a	3445.71	2066.54	2584.38	4065.96	2854.54	2999.83	3839.71	2824.46	2797.92	4869.25	4481.83	3913.88
hsa-miR-34a*	160.917	166.167	151.917	146.125	124.167	127.583	113.292	119.875	127.917	125.5	190.958	179.125
hsa-miR-34b	75.9167	80.4167	101.542	78.2917	62.1667	90.7083	127.125	66.7917	62.5833	89	65.375	91.1042
hsa-miR-34b*	284.333	300.75	355.792	310.667	319.833	350.667	260.833	291.667	314.5	278.042	325.083	344.292
hsa-miR-34c-3p	146.125	94.9167	155.542	144.542	126.5	162.333	127.583	134.583	124.167	130.208	178.167	106.646
hsa-miR-34c-5p	306.208	254.958	263.792	297	260.167	292.625	307.375	239.458	260.167	354.583	303.167	271.875
hsa-miR-361-3p	2895.88	2797.92	2955.88	2375.88	3340.33	2878.21	2655.71	3172	2211.38	3474.38	3621	3233.54
hsa-miR-361-5p	8580.13	9234.96	9682.42	7926.92	9977.33	7926.92	9279.17	10077.5	8743.33	10752.3	10576.2	10077.5
hsa-miR-362-3p	1908.63	2007.88	1775.38	1553.63	2519.25	1627.63	1884.08	2039.17	1489.08	2618.96	2340.79	2026.13
hsa-miR-362-5p	7624.75	6748.96	8680.42	7687.54	7280.75	7219.79	7861.13	7807.21	8244.25	7926.92	8680.42	7986.71
hsa-miR-363	16820.7	14877.2	11572.6	14031.9	18240.9	12191.8	14358.9	14532.8	13083.2	17077.8	19961.6	15075.2
hsa-miR-363*	4133.17	3109.54	3233.54	3952.42	3146.96	3503	3109.54	3340.33	3801.75	2999.83	2729.25	2708
hsa-miR-365	15075.2	14216.4	12053.3	13360	15075.2	12771.5	13360	13596.8	11572.6	17294.7	16158.6	14877.2
hsa-miR-367	121.708	109.542	124.167	121.708	111.833	116.667	109.833	119.875	138.458	104.625	89.9167	124.167
hsa-miR-367*	778	681.542	645.5	783.667	676.167	664.958	747.917	563.75	778	744.083	557.958	715.25
hsa-miR-369-3p	94.1042	100.083	80.1667	85.9583	98.5417	99.5417	176.167	109.542	82.7917	75.9167	116.667	94.375
hsa-miR-369-5p	896.583	841.833	689.25	896.583	952.083	623	815.75	623	747.917	832.083	715.25	738.125
hsa-miR-370	478.708	423.333	381.667	470.917	432.958	413.333	505.792	398.375	427.708	465.333	337.042	398.375
hsa-miR-371-3p	102	142.042	125.5	101.25	151.542	109.125	122.875	142.542	106.646	147.167	140.833	150.25
hsa-miR-371-5p	1065.29	872.583	921.708	1152.79	900.083	859.25	1082.25	828.542	1058.92	979.792	738.125	1053.54
hsa-miR-372	1408.92	1209.38	1192.75	1312.04	1120.46	1229.08	1345.08	1036.79	1234.33	1386.46	986.375	1217.33
hsa-miR-373	37.9583	35.7083	36.375	48.7917	40.8333	52.9167	40.3333	42.3333	36.375	49.9167	56.25	38.5
hsa-miR-373*	51.625	63.4583	64.4167	50.75	63.4583	58.375	64.1667	65.7917	48.7917	68.4583	85.5833	70.8333
hsa-miR-374a	14216.4	22202.8	12771.5	11675.5	24084.6	15764.5	18998.6	21331	9341	23970.2	24084.6	15509.2
hsa-miR-374a*	909.917	1251.75	658.833	921.708	1801.04	815.75	859.25	1345.08	652.292	1500.13	1500.13	986.375
hsa-miR-374b	238.208	388.708	327.625	217.125	323.625	271.125	523.208	681.542	78.2917	391.875	1386.46	345.458
hsa-miR-374b*	395.25	457.5	284.333	379.875	664.958	286.958	451.417	478.708	203.875	704.625	859.25	455.5
hsa-miR-375	7219.79	5001.21	8743.33	7861.13	3621	5534.54	8183.92	6212.92	7452.92	7452.92	7512.08	7807.21
hsa-miR-376a	438.083	402.583	515.042	473.708	379.875	446.417	673.125	441.875	538.792	345.458	429.375	363.292
hsa-miR-376a*	37.9583	40.3333	40	38.5	38.5	38.5	37.0833	40.3333	40	37.9583	37.0833	38.5
hsa-miR-376a*:9.1	109.542	93.8333	112.333	115.875	112.833	98.1667	105.375	94.1042	105.792	102	122.125	112.833
hsa-miR-376b	652.292	623	615.542	692.958	563.75	581.5	805.25	501.667	761.625	664.958	575.208	689.25
hsa-miR-376c	212.292	238.208	280.125	153.792	160.917	181.667	465.333	210.458	196	135.417	297	225.75
hsa-miR-377	859.25	726.083	734.583	926.083	711.667	708.625	896.583	599.625	855.542	851.708	584.125	815.75
hsa-miR-377*	196.75	240.333	239.458	208.333	250.042	237.375	211.042	229.333	265.625	212.292	211.708	243.042
hsa-miR-378	14031.9	15302.7	15764.5	14532.8	15509.2	15953.4	14723.4	15075.2	17077.8	13789.9	14532.8	15953.4
hsa-miR-378*	5285.25	4220.71	4481.83	5884.88	4869.25	4133.17	4521.96	4565.17	4220.71	4093.75	4255.13	4626.25
hsa-miR-379	40.8333	117.417	142.042	71.125	69.7083	144.958	56.0833	100.083	151.917	139.417	105.375	82.4583
hsa-miR-379*	56.7083	55.75	56.7083	57.4167	67.8333	51.625	94.375	55.75	55.0417	77.25	54.3333	55.0417
hsa-miR-380	425.583	317.333	349.833	391.875	298.208	467.167	540.542	354.583	494.917	322.25	321.042	333.708
hsa-miR-380*	183.375	252.083	125.5	167.125	263	111.208	160.917	260.833	173.833	174.375	174.375	177.75
hsa-miR-381	717.125	838.125	841.833	761.625	846.5	704.625	734.583	808.708	715.25	805.25	766.958	783.667
hsa-miR-382	104.625	144.958	127.917	100.083	155.542	136.292	107.646	131.667	169.792	131.208	140.833	141.375
hsa-miR-383	107.646	94.9167	119.5	98.5417	108.542	108.208	91.625	92.2083	93.8333	108.542	156.167	100.167
hsa-miR-384	235.708	174.833	211.042	225.75	167.125	187.75	218.667	138.458	205.708	230.125	160.375	199.5
hsa-miR-409-3p	196.75	189.25	160.917	155	169.083	236.667	179.792	179.792	198	169.083	154.375	225.75
hsa-miR-409-5p	44.2083	50.2917	43.5417	44.2083	57.9167	65.0417	43.9583	46	44.2083	46.6667	43.2083	44.2083
hsa-miR-410	47.9167	64.6667	94.1042	52.625	54.0417	46.6667	49	42.3333	46	49.4167	49.9167	57.25
hsa-miR-411	64.4167	95.7917	67.5833	70.625	75.375	64.4167	133.875	66.7917	68.7917	79.7083	116.667	70.8333
hsa-miR-411*	87.7083	86.4583	96.1667	87.7083	89.9167	84.0417	92.5	89.9167	89.25	87.375	106.646	89.25
hsa-miR-412	421.167	494.917	411.667	385.042	520.375	441.875	376.042	446.417	470.917	435.792	404.5	516.708
hsa-miR-421	12591.3	13596.8	14358.9	12771.5	13360	14031.9	13789.9	14358.9	12913.3	15953.4	16820.7	14532.8
hsa-miR-422a	47.5833	41.7917	47.9167	42.3333	62.5833	63.4583	33.7917	58.375	47.0417	52.625	62.5833	49.9167
hsa-miR-423-3p	18240.9	19453.6	21036.4	18492.5	18998.6	21196.3	18240.9	19643.8	21893.8	18014.5	18240.9	21196.3
hsa-miR-423-5p	12191.8	10853.9	11299.9	12591.3	9387.54	11299.9	10576.2	11435.6	12463	10382	9176.88	10382
hsa-miR-424	9341	10494	8183.92	6748.96	12191.8	9000.63	9065.38	9538.38	7986.71	9901.5	12053.3	9977.33
hsa-miR-424*	4349.88	3688.88	3218.21	3529.75	3218.21	3801.75	3558.5	3218.21	2918.58	3529.75	3503	3558.5
hsa-miR-425	11572.6	17077.8	11951.4	11299.9	21504.6	14877.2	11675.5	15953.4	9065.38	15764.5	21196.3	13789.9
hsa-miR-425*	1979.04	2375.88	1749.21	2120.92	2824.46	2584.38	2007.88	2389.63	2100.17	2539.25	3020.75	2854.54
hsa-miR-429	110.917	101.25	87.125	84.375	131.208	93.4792	86.7708	119.875	77.125	117.417	120.333	104.167
hsa-miR-431	270.333	282.167	208.333	217.125	269.25	264.792	200.042	280.875	220.167	202.208	176.833	234.833
hsa-miR-431*	167.125	109.542	94.1042	109.542	117.417	95.3333	101.25	108.208	100.688	99.5417	92.7917	108.542
hsa-miR-432	239.458	190.958	226.5	238.667	174.375	147.167	208.333	196.75	164.625	194.208	238.208	209.625
hsa-miR-432*	130.208	120.333	240.333	143.167	135.417	177.25	119.5	175.333	252.083	132.75	112.333	133.875
hsa-miR-433	249.208	285.5	265.625	318.75	227.375	291.667	250.042	247.167	299.708	250.042	286.125	274
hsa-miR-448	87.7083	73.125	85.4167	73.3333	77.125	75.9167	81	84.8542	74.875	77.25	89.9167	92.7917
hsa-miR-449a	3913.88	2640.83	2497.5	3060.21	1923.88	3558.5	3393.25	1959.25	2655.71	1691.71	1553.63	1863.33
hsa-miR-449b	1875.58	1702.04	1637.75	2039.17	1637.75	1436.46	1786.58	1436.46	1837.08	1761.13	1408.92	1533.79
hsa-miR-450a	1352	1637.75	1229.08	1337.75	1749.21	1159.67	1476.83	1575.83	1223.58	1510.67	1713	1281.25
hsa-miR-450b-3p	73.3333	76.3333	80.1667	67.2083	66.0833	104.958	70.8333	78.0417	58.6667	60.7917	63.75	74.0417
hsa-miR-450b-5p	872.583	1076.17	880.792	540.542	1094.04	783.667	876.375	1058.92	444.583	1533.79	1544.5	947.625
hsa-miR-451	253.042	207.542	240.333	279.083	213.875	260.167	234.208	173.833	283.458	229	190.958	236.667
hsa-miR-452	774.625	926.083	971.5	648.792	701.042	872.583	934.125	900.083	783.667	676.167	828.542	796.208
hsa-miR-452*	584.125	618.75	595.458	563.75	618.75	587.917	615.542	516.708	615.542	658.833	615.542	661.833
hsa-miR-452*:9.1	2854.54	2708	4065.96	2878.21	2355.5	3688.88	3020.75	3020.75	4806.33	2754.38	3340.33	2440.04
hsa-miR-453	210.458	204.5	250.667	274.917	254.042	239.458	197.375	218.667	187.75	260.167	214.333	256.667
hsa-miR-454	2999.83	2999.83	2854.54	2340.79	3748.21	2895.88	3233.54	3558.5	2340.79	4626.25	4133.17	2977.63
hsa-miR-454*	4626.25	4734.08	5591.04	4255.13	4626.25	4950.33	4255.13	4521.96	2539.25	5339.13	5751.04	4420.67
hsa-miR-455-3p	5491.71	5973.54	7280.75	5928.46	6748.96	7512.08	7049.08	6466.67	5884.88	7144.83	7219.79	7341.29
hsa-miR-455-5p	170.208	104.958	100.083	238.667	205.208	116.667	156.167	173.292	135.417	234.833	266.417	125.5
hsa-miR-483-3p	778	952.083	1031.17	1041.04	623	956.208	991.875	851.708	1178.75	867.667	947.625	1036.79
hsa-miR-483-5p	192.833	169.792	169.083	225.75	185.792	191.458	182.958	146.625	200.75	212.292	173.292	207.542
hsa-miR-484	19821.5	20720.8	21715	19821.5	20465.1	21715	19961.6	20318	22075.7	18726.1	18998.6	21331
hsa-miR-485-3p	284.333	248.167	250.667	260.167	267.208	253.042	284.333	244.917	330.708	307.375	271.125	264.792
hsa-miR-485-5p	399.75	465.333	373.375	419	480.125	400.917	408.458	399.75	410.042	439.917	390.25	451.417
hsa-miR-486-3p	334.417	250.667	243.792	229	244.917	290	222.583	206.583	223.208	274.917	248.167	280.875
hsa-miR-486-5p	3869.08	2556.54	3801.75	4349.88	1786.58	2797.92	3913.88	2681.54	4028.33	3340.33	2454.88	3172
hsa-miR-487a	98.1667	106.646	107	104.167	96.7083	104.958	113.292	94.1042	122.875	119.875	118.333	120.333
hsa-miR-487b	115.875	108.208	116.208	125.167	110.917	93.4792	118.875	102	107.646	119.875	101.25	121.708
hsa-miR-488	150.917	208.833	119.5	148.125	224.75	93.4792	147.583	166.167	113.292	181.667	146.625	159.917
hsa-miR-488*	300.75	223.875	328.708	285.5	236.667	295.75	238.208	269.25	337.042	241.083	193.5	243.042
hsa-miR-489	52.625	60.125	35	65.375	79.25	78.875	55.3333	43.5417	53.4167	72.375	77.25	87.375
hsa-miR-490-3p	319.833	264.792	306.208	315.958	247.167	283.458	297	264.792	319.833	264.792	220.917	234.833
hsa-miR-490-5p	114.167	425.583	104.625	92.2083	1678.25	180.208	121.708	257.875	90.7083	191.458	453.542	161.292
hsa-miR-491-3p	1094.04	979.792	876.375	916.083	1025.71	741.125	921.708	774.625	681.542	1013.42	759	867.667
hsa-miR-491-5p	3255.75	3503	3952.42	3279.83	3777.79	3020.75	3367.17	3367.17	3952.42	3109.54	3310.46	3146.96
hsa-miR-492	61.7917	65.375	60.7917	78.2917	61.375	56.0833	61.7917	70.8333	65.7917	66.3333	54.3333	62.1667
hsa-miR-493	134.75	141.375	102.583	138	113.708	102.583	104.167	122.875	131.667	112.333	89.9167	118.875
hsa-miR-493*	1272.71	2618.96	1114.25	1223.58	2754.38	2026.13	1217.33	2556.54	1003.75	1863.33	1884.08	2155.63
hsa-miR-494	288.292	313.042	274	298.208	290	283.458	301.958	250.667	339.333	292.625	233.125	275.917
hsa-miR-495	245.625	210.458	186.417	261.792	224.75	182.958	215.875	185.125	209.625	220.917	171.875	197.375
hsa-miR-496	55.0417	55.75	58.375	64.1667	59.5417	49.4167	74.875	51.625	56.7083	56.25	59.0833	62.1667
hsa-miR-497	413.333	341.5	461.042	402.583	354.583	391.875	342.875	395.25	307.375	508.708	549.708	453.542
hsa-miR-497*	28.9167	28.9167	28.9167	28.9167	28.9167	30.5	28.9167	28.9167	28.9167	28.9167	28.9167	28.9167
hsa-miR-498	116.208	161.875	94.1042	187.208	143.792	175.333	142.042	179.792	138.458	135.417	142.542	131.208
hsa-miR-499-3p	127.583	112.833	109.833	134.75	109.542	104.167	128.958	100.688	113.292	130.208	85.5833	97.8542
hsa-miR-499-5p	3653	3218.21	3445.71	3801.75	3279.83	3340.33	3445.71	2999.83	3777.79	3503	2955.88	3310.46
hsa-miR-500	11820.9	11752.5	12591.3	12316.2	12053.3	11951.4	12463	11951.4	14031.9	12053.3	11084.5	12191.8
hsa-miR-501-3p	8875.5	7736.21	6748.96	8522.21	7144.83	8795.08	8795.08	7396.63	9234.96	7584.58	7049.08	7926.92
hsa-miR-501-5p	9604.67	9538.38	9832.13	9767.33	9000.63	9901.5	10301.3	10212.5	10681.9	9234.96	8522.21	9467.42
hsa-miR-502-3p,hsa-miR-500*	11752.5	10382	7687.54	11435.6	8457.13	12591.3	11084.5	8680.42	12771.5	9000.63	9604.67	9065.38
hsa-miR-502-5p	658.833	689.25	755.625	661.833	722.167	664.958	846.5	734.583	771	841.833	979.792	832.083
hsa-miR-503	6995.63	5440.54	4177.5	5751.04	4220.71	6935.79	6409.96	4255.13	6409.96	4521.96	5339.13	5440.54
hsa-miR-504	157.292	190.958	131.667	121.125	222.583	131.667	176.833	175.333	139.417	167.625	246.5	166.708
hsa-miR-505	8303.67	8303.67	7144.83	7736.21	8339.63	8743.33	7807.21	8795.08	6935.79	8244.25	8580.13	8522.21
hsa-miR-505*	1749.21	1312.04	2247.33	2100.17	891.333	1430.08	1553.63	1476.83	3084.63	1281.25	1489.08	1939.38
hsa-miR-506	106.417	109.542	110.917	109.542	107.646	115.167	125.5	104.167	114.75	119.875	138	128.958
hsa-miR-507	880.792	774.625	734.583	880.792	771	715.25	841.833	685.542	841.833	820.875	645.5	741.125
hsa-miR-508-3p	74.5417	55.75	59.5417	51.625	85.5833	54.3333	53.4167	59.7917	53.4167	66.3333	103.042	78.2917
hsa-miR-508-5p	109.542	91.1042	98.1667	105.792	92.2083	101.25	100.688	87.125	96.7083	104.625	110.292	98.9583
hsa-miR-509-3-5p	83.75	67.375	58.375	59.5417	72.6667	43.9583	67.2083	74.5417	65.0417	73.3333	63.75	89.25
hsa-miR-509-3p	103.042	83.75	108.542	98.5417	98.5417	131.667	111.833	152.5	133.25	100.688	165.625	127.583
hsa-miR-509-5p	103.042	134.583	136.083	114.75	156.708	166.167	70.8333	192.167	162.333	113.292	126.5	100.167
hsa-miR-510	107.646	87.375	110.917	115.875	93.8333	104.167	100.083	100.083	122.875	96.1667	78.5	99.5417
hsa-miR-511	183.375	156.708	148.125	161.292	133.25	248.167	133.875	204.5	117.417	195.083	227.375	274.917
hsa-miR-512-3p	355.792	395.25	317.333	358.833	417.125	268.25	350.667	334.417	304.75	371.542	300.75	321.042
hsa-miR-512-5p	72.375	69.25	71.9583	84.375	63.4583	70.625	84.0417	78.0417	86.4583	69.375	89.9167	82.4583
hsa-miR-513:9.1	35.7083	41.7917	87.125	35	33.7917	36.375	45.75	46	36.375	35	37.0833	44.2083
hsa-miR-513a-3p	77.125	93.4792	84.0417	80.4167	88.1042	89.25	77.4583	84.0417	81	74.875	87.125	86.4583
hsa-miR-513a-5p	1203.42	1184	1137.29	1258.13	1203.42	1152.79	1209.38	1132.88	1419.5	1173.08	942.375	1192.75
hsa-miR-513b	1521	1019.92	1178.75	1678.25	905.125	1031.17	1242.71	1364.38	3060.21	1173.08	499	1419.5
hsa-miR-513c	112.833	85.4167	105.792	117.875	85.5833	113.292	117.417	75.375	120.583	112.333	87.125	104.167
hsa-miR-514	37.9583	39.125	52.375	37.9583	61.375	60.5417	61.7917	66.7917	36.375	40.3333	49.9167	37.0833
hsa-miR-515-3p	128.625	147.583	162.333	130.583	153.792	158.375	127.917	169.792	149.667	152.5	185.792	156.167
hsa-miR-515-5p	45.75	46	46.2917	44.2083	45.75	49.4167	42.625	51.625	63.75	42.3333	52.375	45.3333
hsa-miR-516a-3p,hsa-miR-516b*	766.958	780.208	717.125	734.583	778	701.042	755.625	664.958	729.5	783.667	685.542	751.792
hsa-miR-516a-5p	629.5	689.25	612.792	652.292	755.625	645.5	625.792	704.625	711.667	652.292	668.708	704.625
hsa-miR-516b	61.0417	69.7083	67.5833	75.1667	64.4167	58.375	68.0417	77.125	60.7917	70.8333	69.25	75.1667
hsa-miR-517*	249.208	164.625	196	221.833	163.625	201.5	223.208	180.75	252.083	278.042	190.958	240.333
hsa-miR-517a	3992.58	3839.71	3869.08	4220.71	3839.71	3952.42	3869.08	3801.75	4349.88	3913.88	3279.83	4093.75
hsa-miR-517a,hsa-miR-517b	274	269.25	236.667	271.875	306.208	247.167	249.208	252.083	245.625	274.917	298.208	238.208
hsa-miR-517c	3503	3060.21	4420.67	3869.08	2774.42	3992.58	3653	3255.75	5632.5	3146.96	2389.63	3367.17
hsa-miR-518a-3p	6560.21	6521.08	7088.46	7049.08	6560.21	6323.42	6748.96	5632.5	7861.13	6081.46	5534.54	6560.21
hsa-miR-518a-5p,hsa-miR-527	202.208	142.542	151.542	206.583	126.5	148.542	209.625	134.583	155	196	113.708	148.125
hsa-miR-518b	179.792	223.208	241.958	190.625	182.292	171.333	210.458	174.833	229	223.208	163.625	183.375
hsa-miR-518c	124.5	147.583	133.25	118.875	143.167	122.875	129.708	125.167	113.292	145.333	116.667	129.708
hsa-miR-518c*	820.875	801.042	761.625	820.875	780.208	729.5	771	729.5	808.708	751.792	676.167	715.25
hsa-miR-518d-3p	1019.92	937.875	952.083	1110.08	966.417	900.083	1031.17	872.583	1070.38	947.625	864.042	905.125
hsa-miR-518e	107.646	116.208	108.542	112.833	107.646	108.208	109.833	130.208	120.583	110.917	118.333	116.208
hsa-miR-518e*,hsa-miR-519a*,hsa-miR-519b-5p,hsa-miR-519c-5p,hsa-miR-522*,hsa-miR-523*	220.917	228.167	134.583	200.75	189.75	220.167	228.167	272.958	279.083	224.75	234.833	234.208
hsa-miR-518e:9.1	527.583	579.042	398.375	516.708	661.833	387.167	496.292	516.708	459.25	546.833	374.667	563.75
hsa-miR-518f	98.1667	73.125	197.375	73.3333	108.542	201.5	75.9167	134.583	79.7083	103.042	149.167	76.3333
hsa-miR-518f*,hsa-miR-518d-5p,hsa-miR-520c-5p,hsa-miR-526a	97.2917	102	83.1042	103.563	96.7083	86.7708	94.1042	105.375	88.1042	89.9167	91.1042	84.8542
hsa-miR-518f:9.1	52.625	57.4167	49.4167	49.4167	59.5417	46.2917	59.0833	46	49.9167	44.2083	64.6667	47.9167
hsa-miR-519a	51.625	47.5833	51.3333	53.4167	46.2917	49.4167	54.3333	52.9167	51.625	51.1667	75.75	52.625
hsa-miR-519b-3p	2340.79	1979.04	2172.21	2355.5	1825.25	1959.25	2424.58	1749.21	2497.5	1951.96	1521	1959.25
hsa-miR-519c-3p	263	241.958	220.917	254.042	234.833	243.042	243.042	215.167	265.625	238.667	256.667	214.333
hsa-miR-519d	83.75	80.4167	100.083	117.417	79.25	122.875	89.9167	49	104.958	84.0417	73.125	75.1667
hsa-miR-519e	252.083	292.625	253.042	271.875	303.167	245.625	267.208	284.333	275.917	292.625	264.792	318.75
hsa-miR-519e*	173.292	260.167	193.5	153.792	265.625	155.542	194.208	223.875	156.167	238.667	220.917	229.333
hsa-miR-520a-3p	417.125	384	520.375	455.5	363.292	475.75	485.083	406.917	487.042	408.458	425.583	485.083
hsa-miR-520a-5p	119.5	126.5	92.7917	117.875	118.875	111.208	108.542	96.1667	98.1667	105.375	106.646	108.542
hsa-miR-520b,hsa-miR-520c-3p,hsa-miR-520f	94.1042	94.9167	102.583	90.4167	98.5417	101.25	100.083	94.1042	104.167	92.7917	97.2917	117.417
hsa-miR-520c-3p,hsa-miR-520f	142.542	122.125	158.625	139.417	138.917	121.708	130.583	106.646	144.958	140.292	116.667	124.167
hsa-miR-520d:9.1	111.833	92.5	88.5417	105.792	93.8333	89.25	85.4167	106.646	95.3333	89	94.9167	102
hsa-miR-520d-3p	81	71.125	62.1667	96.1667	84.375	95.3333	80.1667	78.5	79.7083	81	52.375	86.4583
hsa-miR-520d-5p	192.167	151.917	148.125	162.833	170.667	138	180.75	144.958	200.75	167.125	165.625	211.042
hsa-miR-520e	114.167	66.3333	92.7917	61.0417	40.8333	71.4583	70.2917	47.9167	93.8333	55.3333	124.167	41.2917
hsa-miR-520f	48.7917	47.5833	46.2917	47.5833	52.375	45.75	47.0417	50.2917	48.7917	48.7917	45.75	47.9167
hsa-miR-520g	61.7917	132.75	137.167	67.8333	71.125	101.25	98.1667	142.542	135.417	70.8333	49.4167	104.167
hsa-miR-520h,hsa-miR-520g	59.5417	52.625	55.3333	52.625	66.0833	61.375	53.4167	60.7917	55.0417	61.7917	67.8333	64.1667
hsa-miR-521	77.125	103.042	103.563	101.25	104.625	118.875	93.4792	96.1667	104.958	110.292	60.7917	93.8333
hsa-miR-522	303.167	340.167	301.958	308.958	345.458	254.958	297	358.833	288.292	429.375	453.542	267.208
hsa-miR-523	173.292	164.625	143.167	169.792	167.125	169.083	166.708	158.625	176.167	183.917	149.167	161.292
hsa-miR-524-3p	155.542	120.333	122.125	138.458	118.333	126.125	126.5	112.333	149.667	132.75	110.292	117.417
hsa-miR-524-5p	205.208	192.167	220.917	208.833	192.833	260.833	200.042	202.917	241.958	203.875	205.208	263
hsa-miR-525-3p	664.958	417.125	668.708	722.167	406.917	652.292	648.792	455.5	880.792	571.875	459.25	632.792
hsa-miR-525-5p	1152.79	974.917	916.083	1184	979.792	876.375	1094.04	820.875	1047.54	1008.71	780.208	916.083
hsa-miR-526b	48.7917	52.625	51.3333	56.25	52.375	63.4583	47.5833	47.9167	49.9167	46.6667	45.75	46.2917
hsa-miR-526b*	67.375	76.3333	90.4167	79.25	67.8333	66.0833	86.7708	70.8333	74.875	64.6667	66.3333	69.375
hsa-miR-526b:9.1	100.083	101.25	90.4167	111.833	80.4167	87.375	151.542	80.4167	99.5417	112.333	74.5417	89.25
hsa-miR-532-3p	11951.4	12191.8	13596.8	12913.3	11435.6	13083.2	12316.2	12191.8	13596.8	11951.4	11820.9	13083.2
hsa-miR-532-5p	6147	6147	6276.46	5825.75	7219.79	5235.54	6020.25	7088.46	6608.5	6850.42	7088.46	6212.92
hsa-miR-539	610.333	567.25	492.792	581.5	510.875	516.708	557.958	394.042	496.292	584.125	417.125	475.75
hsa-miR-541	100.083	125.167	165.167	113.708	140.833	163.625	111.833	165.167	89.25	135.417	101.25	114.167
hsa-miR-541*	138	118.333	125.5	139.417	114.75	118.875	141.375	98.1667	133.875	138.458	116.667	138.917
hsa-miR-542-3p	415.583	755.625	313.042	396.75	1076.17	629.5	431.208	711.667	295.75	722.167	1145.79	508.708
hsa-miR-542-5p	243.042	219.542	114.75	185.125	182.292	219.542	236.667	196.75	176.167	229	238.667	199.5
hsa-miR-543	114.167	155	100.688	111.833	219.542	95.3333	98.9583	232.583	108.208	109.542	157.292	145.333
hsa-miR-544	24208.3	21504.6	25147.9	23826.3	18014.5	23826.3	24730.9	22202.8	24730.9	19821.5	23826.3	18240.9
hsa-miR-545	104.625	96.7083	88.5417	108.208	93.8333	82.7917	101.25	81.7917	122.875	105.375	87.125	87.375
hsa-miR-545*	483.25	473.708	444.583	439.917	465.333	536.375	480.125	432.958	459.25	487.042	632.792	444.583
hsa-miR-545:9.1	838.125	832.083	937.875	780.208	808.708	867.667	780.208	824.208	872.583	788	867.667	824.208
hsa-miR-548a-3p	2235.75	1895.04	1951.96	2306.42	1813.42	1837.08	2172.21	1637.75	2319.33	1848.63	1564.79	1801.04
hsa-miR-548a-5p	77.125	65.375	64.4167	67.8333	69.7083	63.4583	85.4167	63.0417	74.875	81	81.7917	67.375
hsa-miR-548b-3p	494.917	581.5	395.25	492.792	717.125	567.25	444.583	587.917	374.667	581.5	673.125	575.208
hsa-miR-548b-5p	3529.75	3233.54	3393.25	3688.88	2977.63	3367.17	3621	2895.88	3419.92	3367.17	2708	3109.54
hsa-miR-548c-3p	149.667	177.25	146.125	166.167	177.75	149.667	142.042	160.375	157.792	170.667	220.917	166.708
hsa-miR-548c-5p	448.333	599.625	396.75	478.708	704.625	446.417	475.75	618.75	293.75	648.792	788	438.083
hsa-miR-548d-3p	1145.79	1003.75	1126.29	766.958	1008.71	952.083	820.875	926.083	744.083	1137.29	1397.21	1058.92
hsa-miR-548d-5p	1637.75	1097.75	1939.38	1951.96	1019.92	1510.67	1724.29	1272.71	2247.33	1476.83	1159.67	1619.04
hsa-miR-548e	277	648.792	365.958	263.792	623	485.083	395.25	571.875	127.917	805.25	1036.79	379.875
hsa-miR-548f	501.667	481.292	357.667	499	529.75	370.125	508.708	431.208	431.208	542.958	465.333	499
hsa-miR-548g	244.917	231.917	269.25	241.083	243.792	303.167	217.125	236.667	269.25	213.875	209.625	231.917
hsa-miR-548h	89.9167	89.5833	78.0417	82.4583	149.167	90.7083	89.9167	102	95.3333	102	195.083	95.7917
hsa-miR-548i	203.375	140.292	177.75	227.375	134.583	194.208	173.833	142.542	232.583	164.208	136.083	170.667
hsa-miR-548j	512.958	592.25	676.167	480.125	761.625	455.5	354.583	755.625	575.208	692.958	1178.75	668.708
hsa-miR-548k	78.2917	69.25	76.75	100.083	100.167	105.792	89.9167	79.25	104.958	68.4583	56.25	69.375
hsa-miR-548l	187.208	187.75	163.625	168.333	176.167	157.292	189.25	140.292	189.25	180.208	192.833	189.75
hsa-miR-548m	645.5	778	399.75	587.917	956.208	381.667	468.708	751.792	468.708	549.708	604	538.792
hsa-miR-548n	45.75	40.8333	46.2917	44.2083	40.8333	43.9583	45.75	39.125	42.3333	41.2917	40.8333	51.1667
hsa-miR-548o	480.125	443.25	294.583	313.042	715.25	453.542	448.333	542.958	361.583	480.125	991.875	656.208
hsa-miR-548p	259.125	254.042	203.375	257.875	290	223.208	235.708	225.75	235.708	271.125	268.25	220.917
hsa-miR-549	264.792	184.542	157.292	202.917	193.5	159.417	182.958	183.917	192.167	187.208	146.625	180.75
hsa-miR-550	5884.88	4806.33	2895.88	5440.54	4565.17	2539.25	5700.38	4806.33	3109.54	3621	4349.88	3020.75
hsa-miR-550*	4220.71	3310.46	2519.25	2955.88	3529.75	2854.54	3718.17	3529.75	2440.04	2519.25	3419.92	2375.88
hsa-miR-551a	2306.42	2195.04	2026.13	2319.33	2319.33	1895.04	2319.33	2172.21	2556.54	2389.63	2235.75	2285.04
hsa-miR-551b	54.0417	46	92.2083	45.75	81.7917	73.3333	50.2917	57.25	60.7917	55.3333	48.25	78.2917
hsa-miR-551b*	87.7083	124.167	90.4167	107	93.8333	85.5833	82.4583	89	102	100.688	96.1667	82.4583
hsa-miR-552	124.5	112.833	130.583	128.625	101.542	128.958	136.292	92.7917	139.417	119.875	113.708	132.75
hsa-miR-553	143.792	120.333	131.667	151.917	81.7917	120.333	147.583	77.125	165.625	126.5	84.0417	114.167
hsa-miR-554	536.375	527.583	540.542	571.875	536.375	556.083	560.292	515.042	599.625	575.208	538.792	571.875
hsa-miR-555	72.375	71.125	73.125	76.75	79.25	63.4583	69.25	81.7917	69.7083	73.3333	66.3333	75.1667
hsa-miR-556-3p	271.875	236.667	184.542	331.542	158.375	203.375	357.667	222.583	146.125	439.917	364.542	446.417
hsa-miR-556-5p	86.7708	114.75	87.125	92.2083	112.833	127.583	37.9583	94.1042	43.2083	98.5417	180.208	104.167
hsa-miR-557	43.5417	50.2917	41.2917	52.625	82.7917	43.9583	60.125	70.8333	44.2083	53.7917	62.5833	44.2083
hsa-miR-558	70.2917	70.625	68.4583	97.8542	86.7708	75.1667	73.6667	64.4167	89.25	82.7917	110.292	93.8333
hsa-miR-559	353.417	348.5	322.25	371.542	360.125	299.708	358.833	301.958	337.042	340.167	348.5	278.042
hsa-miR-560:9.1	1203.42	1735.17	1500.13	1619.04	1761.13	1460.42	1378.25	1460.42	2155.63	1564.79	1364.38	2120.92
hsa-miR-561	183.375	180.75	136.083	136.083	210.458	139.417	152.5	182.958	153.792	138	226.5	165.625
hsa-miR-562	42.3333	41.7917	54.0417	50.75	42.3333	87.375	102	68.4583	46	42.3333	40.8333	42.3333
hsa-miR-563	313.042	327.625	345.458	325.083	333.708	342.875	306.208	317.333	342.875	350.667	327.625	348.5
hsa-miR-564	1114.25	991.875	1097.75	1234.33	1053.54	1087.71	1003.75	1070.38	1397.21	1047.54	876.375	1076.17
hsa-miR-565:9.1	7986.71	6323.42	6212.92	7452.92	7396.63	6608.5	6081.46	6850.42	6466.67	5632.5	4521.96	4349.88
hsa-miR-566	771	824.208	974.917	759	824.208	921.708	828.542	1036.79	876.375	880.792	729.5	692.958
hsa-miR-567	180.75	174.833	155.542	178.167	182.292	142.042	165.625	169.792	155	191.458	187.75	157.792
hsa-miR-568	171.333	173.292	203.375	181.292	165.167	192.167	169.792	204.5	200.75	170.667	178.167	170.667
hsa-miR-569	154.375	146.125	197.375	179.792	145.333	153.792	155	124.167	180.75	177.75	200.042	134.75
hsa-miR-570	226.5	241.958	229.333	142.042	423.333	127.583	133.875	185.792	202.917	290	544.875	220.917
hsa-miR-571	1103.96	1047.54	942.375	1082.25	1047.54	841.833	1058.92	867.667	942.375	1087.71	778	891.333
hsa-miR-572	384	441.875	531.75	423.333	385.042	527.583	427.708	435.792	584.125	327.625	355.792	406.917
hsa-miR-573	579.042	540.542	480.125	553.583	492.792	419	516.708	490.792	443.25	523.208	404.5	455.5
hsa-miR-574-3p	21196.3	19821.5	14877.2	20465.1	14358.9	20885.9	21036.4	13196.7	21504.6	16158.6	14723.4	18014.5
hsa-miR-574-5p	5973.54	4133.17	7452.92	7144.83	3474.38	4806.33	6521.08	4906.21	9977.33	4806.33	4255.13	5123.92
hsa-miR-575	65.7917	44.2083	69.7083	51.625	54.0417	68.0417	42.625	55.75	78.875	51.9167	39.125	56.0833
hsa-miR-576-3p	485.083	256.667	220.917	370.125	417.125	225.75	334.417	364.542	234.833	527.583	652.292	361.583
hsa-miR-576-5p	9832.13	9387.54	10752.3	10301.3	7807.21	9538.38	10139	11084.5	10077.5	11675.5	11951.4	11435.6
hsa-miR-577	61.0417	82.0417	78.0417	62.1667	64.4167	61.7917	73.3333	83.1042	60.7917	66.3333	71.125	65.375
hsa-miR-578	322.25	275.917	376.042	350.667	312	334.417	338.042	264.792	400.917	282.167	268.25	313.042
hsa-miR-579	260.833	332.958	152.5	255.708	451.417	325.083	321.042	388.708	220.167	363.292	394.042	245.625
hsa-miR-580	310.667	318.75	218.667	245.625	327.625	227.375	284.333	280.875	250.667	274.917	342.875	246.5
hsa-miR-581	315.958	322.25	335.667	322.25	363.292	345.458	308.958	337.042	333.708	325.083	411.667	330.708
hsa-miR-582-3p	174.833	204.5	225.75	173.292	238.208	214.333	226.5	215.875	225.75	254.042	332.958	228.167
hsa-miR-582-5p	5187.92	5534.54	5285.25	4677.33	8137.83	5123.92	4734.08	6748.96	4521.96	6608.5	7341.29	5380.92
hsa-miR-583	783.667	668.708	793.083	808.708	571.875	726.083	697.042	581.5	905.125	656.208	515.042	652.292
hsa-miR-584	152.958	158.625	153.792	162.833	184.542	169.083	177.75	158.625	171.875	177.75	209.625	259.125
hsa-miR-585	1110.08	900.083	926.083	1167.71	916.083	947.625	1025.71	859.25	952.083	1019.92	801.042	916.083
hsa-miR-586	158.375	138	152.5	156.167	129.708	187.75	145.333	127.583	159.917	156.167	137.167	145.333
hsa-miR-587	106.417	93.8333	96.1667	96.7083	101.542	111.208	86.7708	154.375	108.208	87.375	110.292	91.1042
hsa-miR-588	189.25	310.667	274.917	209.625	331.542	239.458	243.042	327.625	248.167	317.333	379.875	391.875
hsa-miR-589	4906.21	3020.75	2797.92	3718.17	2172.21	2918.58	3777.79	2655.71	3146.96	2708	2306.42	2955.88
hsa-miR-589*	648.792	717.125	496.292	704.625	998.167	384	701.042	876.375	581.5	916.083	1087.71	956.208
hsa-miR-590-3p	1489.08	3558.5	1184	864.042	4349.88	1951.96	2247.33	3279.83	438.083	4565.17	5285.25	2754.38
hsa-miR-590-5p	144.958	161.875	119.5	122.875	217.125	155.542	153.792	125.167	114.75	152.958	180.208	125.5
hsa-miR-591	1184	1013.42	960.708	1251.75	991.875	974.917	1145.79	838.125	1082.25	1070.38	812.125	966.417
hsa-miR-592	345.458	339.333	298.208	358.833	348.5	323.625	406.917	307.375	315.958	376.042	439.917	353.417
hsa-miR-593	200.042	233.125	211.042	192.833	228.167	230.125	164.625	255.708	267.208	147.167	143.792	158.625
hsa-miR-593*	195.083	178.542	217.125	198	177.75	142.042	160.917	187.75	275.917	177.75	174.375	212.292
hsa-miR-594:9.1	10382	11084.5	7986.71	9604.67	12316.2	9387.54	9682.42	9832.13	9832.13	8072.42	6466.67	7452.92
hsa-miR-595	93.4792	77.4583	112.333	93.4792	60.5417	86.4583	119.5	109.542	66.7917	71.9583	88.5417	81.375
hsa-miR-596	455.5	444.583	492.792	483.25	432.958	473.708	439.917	448.333	534.25	415.583	453.542	443.25
hsa-miR-597	176.167	161.875	167.125	183.917	152.958	173.292	174.833	144.958	192.167	165.167	132.75	150.25
hsa-miR-598	2026.13	2267.38	2066.54	1670.63	2618.96	2134.13	1660.13	2026.13	1242.71	3194.67	3869.08	2539.25
hsa-miR-599	63.0417	52.625	60.7917	67.2083	66.0833	68.0417	57.4167	91.625	52.375	72.375	56.25	58.6667
hsa-miR-600	81	88.5417	71.9583	89	89	67.375	74.875	89	74.875	75.9167	82.4583	73.125
hsa-miR-601	85.9583	67.375	75.375	80.4167	64.4167	75.1667	82.4583	70.8333	92.5	87.375	105.375	67.375
hsa-miR-602	366.958	307.375	321.042	365.958	254.958	290	399.75	208.833	297	365.958	220.917	307.375
hsa-miR-603	1735.17	1713	2655.71	2080.83	1460.42	2247.33	1761.13	1939.38	3367.17	1678.25	1449.96	2100.17
hsa-miR-604	527.583	182.292	104.625	413.333	229	361.583	374.667	194.208	354.583	177.75	92.7917	365.958
hsa-miR-605	122.875	118.333	114.75	142.042	134.583	139.417	122.875	126.125	153.792	127.125	97.2917	131.667
hsa-miR-606	33.7917	34.4583	32.0833	33.7917	35	32.0833	32.0833	34.4583	32.0833	35	32.9167	32.9167
hsa-miR-607	473.708	529.75	465.333	457.5	475.75	685.542	556.083	451.417	571.875	473.708	487.042	599.625
hsa-miR-608	176.167	295.75	171.333	150.25	267.208	181.667	192.833	263	192.167	231	171.875	219.542
hsa-miR-609	708.625	610.333	529.75	658.833	560.292	610.333	623	457.5	569.833	615.542	510.875	553.583
hsa-miR-610	1234.33	2440.04	1041.04	952.083	3194.67	2120.92	1408.92	2306.42	516.708	1670.63	2211.38	1337.75
hsa-miR-611	47.0417	43.2083	41.2917	46.2917	42.625	43.9583	45.75	42.3333	42.3333	44.2083	44.2083	42.3333
hsa-miR-612	612.792	473.708	544.875	604	481.292	499	432.958	567.25	734.583	503.375	431.208	584.125
hsa-miR-613	173.292	200.042	181.292	177.25	222.583	169.083	187.208	211.042	156.708	215.167	202.917	195.083
hsa-miR-614	1137.29	1087.71	1152.79	1173.08	1110.08	905.125	1087.71	1076.17	956.208	1019.92	808.708	900.083
hsa-miR-615-3p	9538.38	8944.25	9387.54	9682.42	9176.88	9234.96	9341	9279.17	9901.5	8680.42	8137.83	8875.5
hsa-miR-615-5p	9176.88	8795.08	7219.79	9387.54	8680.42	9341	8522.21	8743.33	8406	7280.75	6850.42	8795.08
hsa-miR-616	391.875	158.625	503.375	304.75	196	229	291.667	225.75	421.167	226.5	195.083	323.625
hsa-miR-616*	1053.54	1159.67	855.542	905.125	1303.5	886.542	1114.25	1229.08	623	1251.75	1184	1070.38
hsa-miR-617	353.417	323.625	282.167	349.833	353.417	256.667	292.625	314.5	290	328.708	246.5	244.917
hsa-miR-618	1173.08	1328.17	1008.71	1203.42	1419.5	1801.04	1041.04	1192.75	909.917	1145.79	1786.58	1749.21
hsa-miR-619	534.25	508.708	571.875	546.833	512.958	632.792	515.042	534.25	759	411.667	340.167	415.583
hsa-miR-620	266.417	240.333	299.708	271.125	219.542	297	252.083	220.917	318.75	232.583	224.75	267.208
hsa-miR-621	49.7083	75.1667	52.9167	47.5833	49.7083	50.2917	47.9167	49	51.625	51.1667	53.7917	51.1667
hsa-miR-622	104.625	89.5833	109.833	116.667	114.75	103.563	107.646	96.1667	102	104.625	120.333	107.646
hsa-miR-623	134.75	148.542	98.1667	153.792	145.333	200.042	354.583	122.125	111.208	98.5417	202.917	122.875
hsa-miR-624	236.667	284.333	286.125	204.5	274.917	257.875	286.958	278.042	225.75	298.208	294.583	332.958
hsa-miR-624*	6212.92	8457.13	8137.83	5380.92	8303.67	8457.13	7986.71	9341	2895.88	8580.13	8795.08	7280.75
hsa-miR-625	7280.75	6995.63	6935.79	7584.58	7452.92	5884.88	6608.5	7861.13	6995.63	7049.08	8339.63	7088.46
hsa-miR-625*	9065.38	8137.83	8406	9234.96	7341.29	7687.54	9000.63	7926.92	8303.67	7687.54	7687.54	8244.25
hsa-miR-626	294.583	243.792	282.167	290.708	239.458	266.417	269.25	230.125	290	250.042	206.583	217.125
hsa-miR-627	2080.83	2681.54	2729.25	2134.13	2440.04	2481.96	2211.38	2406.96	1597.33	2080.83	3233.54	2389.63
hsa-miR-628-3p	4309.71	3653	5235.54	4626.25	2999.83	3529.75	4177.5	4177.5	4420.67	4309.71	4177.5	4309.71
hsa-miR-628-5p	4565.17	3279.83	5884.88	5187.92	2556.54	3748.21	5591.04	4093.75	3529.75	4420.67	3591.08	5285.25
hsa-miR-629	2319.33	2519.25	2640.83	2235.75	3913.88	2007.88	1813.42	2754.38	2519.25	2497.5	3653	2895.88
hsa-miR-629*	6748.96	6798.54	5491.71	6560.21	5591.04	5440.54	6798.54	6409.96	5001.21	6995.63	6995.63	6798.54
hsa-miR-630	75.9167	75.1667	71.9583	125.167	115.875	73.3333	182.958	87.125	87.125	89	69.25	78.2917
hsa-miR-631	185.125	177.25	238.208	261.792	172.458	194.208	202.917	196.75	229	185.792	202.917	220.167
hsa-miR-632	286.125	294.583	415.583	299.708	299.708	399.75	240.333	280.875	254.958	221.833	274.917	264.792
hsa-miR-633	81	73.125	71.9583	82.4583	77.125	78.0417	72.375	66.7917	69.7083	81	87.125	82.4583
hsa-miR-634	363.292	395.25	334.417	400.917	410.042	373.375	350.667	366.958	363.292	363.292	355.792	339.333
hsa-miR-635	59.5417	46	65.375	84.375	47.9167	109.833	52.375	52.9167	69.7083	56.25	70.2917	53.7917
hsa-miR-636	563.75	738.125	722.167	664.958	859.25	1003.75	820.875	704.625	579.042	587.917	916.083	708.625
hsa-miR-637	138	234.208	187.208	146.625	200.042	130.208	181.667	222.583	159.917	175.333	138	170.667
hsa-miR-638	444.583	338.042	475.75	259.125	265.625	280.125	267.208	400.917	544.875	280.125	278.042	358.833
hsa-miR-639	117.417	185.792	200.75	125.167	203.875	195.542	143.792	150.917	133.875	117.417	132.75	140.292
hsa-miR-640	90.7083	104.958	84.0417	101.25	95.7917	87.375	104.167	113.708	93.8333	107.646	79.25	91.1042
hsa-miR-641	956.208	872.583	778	986.375	832.083	741.125	942.375	692.958	793.083	998.167	956.208	788
hsa-miR-642	8244.25	7986.71	9467.42	8580.13	6212.92	8406	8244.25	8303.67	7219.79	8072.42	8743.33	9130.38
hsa-miR-643	512.958	463.375	421.167	508.708	534.25	435.792	453.542	438.083	459.25	443.25	421.167	387.167
hsa-miR-644	113.292	124.167	208.333	138.458	110.917	120.583	95.3333	177.75	149.667	109.542	103.042	161.292
hsa-miR-645	341.5	379.875	388.708	355.792	400.917	357.667	404.5	365.958	352.25	363.292	448.333	366.958
hsa-miR-646	832.083	812.125	708.625	812.125	783.667	612.792	711.667	741.125	805.25	715.25	612.792	668.708
hsa-miR-647	546.833	536.375	538.792	636.458	404.5	697.042	632.792	478.708	629.5	560.292	465.333	636.458
hsa-miR-648	78.2917	83.75	78.875	80.4167	72.375	70.625	79.7083	65.7917	73.3333	86.4583	67.8333	67.375
hsa-miR-649	198	156.167	142.042	158.375	163.625	136.292	147.583	132.75	169.792	144.542	129.708	127.583
hsa-miR-650	69.25	64.1667	67.5833	85.4167	69.7083	80.4167	63.0417	87.125	66.7917	63.75	77.25	67.375
hsa-miR-651	1319.79	1991.92	1217.33	1288.67	2655.71	1397.21	1489.08	1670.63	1019.92	2052	2319.33	1303.5
hsa-miR-652	3718.17	3474.38	3146.96	3653	3419.92	2955.88	3340.33	4220.71	3913.88	3869.08	4065.96	3839.71
hsa-miR-653	755.625	595.458	747.917	729.5	584.125	563.75	708.625	556.083	648.792	711.667	579.042	648.792
hsa-miR-653:9.1	249.208	213.125	256.667	183.375	229.333	217.125	171.875	205.708	222.583	198.917	161.875	192.167
hsa-miR-654-3p	181.667	225.75	175.333	177.25	174.375	190.625	167.125	196.75	213.125	203.875	270.333	193.5
hsa-miR-654-5p	243.042	211.708	342.875	191.458	196.75	387.167	419	277	189.25	247.167	272.958	270.333
hsa-miR-655	70.8333	55.75	63.4583	58.375	67.8333	45.75	53.4167	59.7917	82.7917	53.7917	49.9167	52.625
hsa-miR-656	41.2917	37.0833	42.625	40.3333	37.0833	40.8333	41.2917	35.7083	41.2917	41.2917	43.2083	35.7083
hsa-miR-657	220.167	184.542	220.917	233.125	180.75	198	201.5	166.167	190.625	191.458	171.875	189.75
hsa-miR-658	82.4583	82.0417	85.4167	83.1042	84.375	90.7083	75.9167	68.4583	82.7917	96.1667	92.7917	95.7917
hsa-miR-659	1003.75	900.083	828.542	974.917	1003.75	880.792	979.792	960.708	891.333	937.875	921.708	1041.04
hsa-miR-660	1500.13	2319.33	1959.25	1637.75	4385.83	1678.25	1848.63	2481.96	1637.75	2878.21	3718.17	2195.04
hsa-miR-661	410.042	408.458	467.167	410.042	396.75	481.292	510.875	503.375	587.917	459.25	337.042	459.25
hsa-miR-662	45.75	57.4167	49.4167	54.0417	55.75	77.125	65.375	55.75	95.3333	75.9167	73.125	58.6667
hsa-miR-663	2729.25	3194.67	2878.21	3040.63	2895.88	3255.75	2824.46	3172	3558.5	2797.92	1979.04	3393.25
hsa-miR-663b	2100.17	4065.96	2999.83	2406.96	3109.54	2655.71	2729.25	2708	4255.13	1597.33	1627.63	2729.25
hsa-miR-664	4420.67	7807.21	4255.13	4906.21	10382	6798.54	4869.25	7280.75	3194.67	6748.96	7736.21	5973.54
hsa-miR-664*	998.167	1627.63	1070.38	859.25	4521.96	1242.71	900.083	1234.33	1070.38	1223.58	1597.33	1265.71
hsa-miR-665	689.25	676.167	692.958	610.333	729.5	708.625	685.542	805.25	553.583	595.458	592.25	658.833
hsa-miR-668	205.208	326.5	267.208	340.167	238.208	339.333	337.042	268.25	272.958	286.125	196	288.292
hsa-miR-671:9.1	805.25	796.208	766.958	960.708	812.125	886.542	812.125	974.917	1036.79	846.5	832.083	778
hsa-miR-671-3p	5440.54	5751.04	5825.75	5591.04	5632.5	6081.46	5001.21	5591.04	5751.04	4906.21	4906.21	5075.33
hsa-miR-671-5p	142.542	112.833	69.7083	94.9167	92.2083	99.5417	81.7917	115.875	111.208	106.646	94.9167	104.167
hsa-miR-675	7512.08	8580.13	9000.63	7807.21	7861.13	8627.13	7396.63	8406	9538.38	7341.29	7986.71	9279.17
hsa-miR-7	26915.8	27134.8	26033	26558	27452.7	25246.3	26723.5	27452.7	23826.3	27134.8	28079.2	26194.6
hsa-miR-708	92.2083	111.833	138.917	140.833	168.333	166.167	115.167	104.167	119.5	162.333	202.917	180.75
hsa-miR-708*	208.833	219.542	188.417	210.458	231.917	180.208	190.958	208.333	210.458	196	149.167	176.833
hsa-miR-7-1*	4869.25	4093.75	4220.71	3279.83	3952.42	3591.08	4028.33	3060.21	3445.71	3688.88	5491.71	3621
hsa-miR-7-2*	46.6667	44.2083	45.3333	47.5833	46.2917	42.3333	43.9583	49	48.7917	44.2083	40.8333	41.2917
hsa-miR-720	26426.8	26723.5	26915.8	26723.5	26558	27452.7	26915.8	26308.6	25850.5	26426.8	25606.6	25606.6
hsa-miR-744	10576.2	10576.2	11435.6	10985.2	9832.13	10985.2	10077.5	11180.5	11951.4	10077.5	10139	11572.6
hsa-miR-744*	338.042	387.167	227.375	321.042	444.583	245.625	290	310.667	234.208	326.5	321.042	290
hsa-miR-760	1242.71	1303.5	2211.38	1352	1126.29	1749.21	1258.13	1500.13	1863.33	1132.88	1126.29	1553.63
hsa-miR-765	203.375	178.542	231.917	179.125	173.833	271.875	238.667	187.75	274	197.375	253.042	256.667
hsa-miR-766	4177.5	4521.96	5700.38	4734.08	3688.88	5187.92	4677.33	4677.33	5591.04	4950.33	4734.08	5751.04
hsa-miR-767-3p	841.833	956.208	998.167	771	855.542	909.917	766.958	905.125	610.333	974.917	1364.38	1031.17
hsa-miR-767-5p	6276.46	5700.38	4093.75	5632.5	5123.92	7736.21	5380.92	4385.83	6147	4481.83	5700.38	5591.04
hsa-miR-768-3p:11.0	25036.5	26426.8	20720.8	25734.6	24504.3	26915.8	25850.5	23079.7	24208.3	18240.9	17077.8	24084.6
hsa-miR-768-5p:11.0	21893.8	23362.8	18014.5	22202.8	21893.8	23485.9	22306.3	21036.4	22592.8	17580	15953.4	22306.3
hsa-miR-769-3p	1436.46	1500.13	1296.58	1500.13	2066.54	1713	1386.46	1991.92	1670.63	1884.08	2497.5	2066.54
hsa-miR-769-5p	5123.92	4349.88	5001.21	5001.21	4309.71	4734.08	4950.33	4309.71	5339.13	5285.25	5235.54	5440.54
hsa-miR-770-5p	54.0417	65.375	56.7083	56.25	51.1667	52.9167	72.375	54.0417	77.125	51.1667	51.3333	52.625
hsa-miR-801:9.1	398.375	438.083	304.75	350.667	544.875	354.583	384	370.125	355.792	431.208	325.083	335.667
hsa-miR-802	187.208	144.958	155	181.292	137.167	153.792	180.75	115.875	167.125	157.292	128.625	161.292
hsa-miR-873	96.1667	96.7083	87.125	99.5417	121.708	120.583	124.5	141.375	84.375	106.646	138.917	95.7917
hsa-miR-874	1553.63	1691.71	1145.79	1713	1951.96	2039.17	1419.5	1895.04	1345.08	1939.38	2134.13	2319.33
hsa-miR-875-3p	254.958	238.208	200.75	245.625	257.875	205.208	202.917	213.875	213.125	208.333	167.125	217.125
hsa-miR-875-5p	618.75	557.958	556.083	599.625	496.292	549.708	612.792	494.917	567.25	636.458	503.375	612.792
hsa-miR-876-3p	210.458	167.625	286.125	181.292	245.625	143.167	170.667	199.5	183.917	201.5	230.125	164.208
hsa-miR-876-5p	195.083	280.125	179.792	156.167	321.042	293.75	173.833	294.583	141.375	241.083	325.083	250.667
hsa-miR-877	6608.5	5884.88	8072.42	6798.54	4677.33	6466.67	5928.46	6020.25	9604.67	4677.33	5001.21	6409.96
hsa-miR-877*	1564.79	1647.21	1813.42	1895.04	960.708	1337.75	2052	1303.5	1848.63	1337.75	1137.29	1627.63
hsa-miR-885-3p	345.458	417.125	318.75	378.25	374.667	278.042	347.042	331.542	368.292	319.833	236.667	347.042
hsa-miR-885-5p	104.625	146.125	74.0417	105.792	89.9167	84.0417	113.292	117.875	162.833	73.3333	122.125	108.542
hsa-miR-886-3p	370.125	337.042	378.25	353.417	350.667	328.708	321.042	325.083	398.375	345.458	308.958	379.875
hsa-miR-886-5p	279.083	323.625	406.917	318.75	331.542	330.708	231.917	387.167	308.958	297	330.708	284.333
hsa-miR-887	432.958	355.792	358.833	429.375	438.083	398.375	379.875	366.958	455.5	451.417	496.292	492.792
hsa-miR-888	315.958	549.708	323.625	285.5	575.208	431.208	339.333	512.958	257.875	483.25	540.542	429.375
hsa-miR-888*	70.2917	82.0417	60.7917	75.1667	55.75	77.125	60.7917	64.4167	81	63.75	44.2083	66.0833
hsa-miR-889	1296.58	1489.08	1521	1397.21	1449.96	1167.71	1533.79	1430.08	1303.5	1647.21	1430.08	1647.21
hsa-miR-890	1132.88	1065.29	1047.54	1229.08	1058.92	1041.04	1152.79	896.583	1328.17	1065.29	855.542	1019.92
hsa-miR-891a	79.25	157.792	196	169.792	127.583	160.917	155	127.583	144.958	174.375	217.125	197.375
hsa-miR-891b	36.375	39.125	32.0833	36.375	35	32.9167	33.7917	30.5	34.4583	37.9583	34.4583	32.9167
hsa-miR-892a	54.0417	47.5833	43.5417	56.25	59.5417	42.3333	49	54.0417	55.0417	46.6667	56.25	49.9167
hsa-miR-892b	51.1667	52.625	49.4167	51.625	57.25	50.2917	51.3333	68.4583	60.7917	85.5833	61.7917	60.5417
hsa-miR-9	15302.7	18240.9	18726.1	15075.2	18726.1	19453.6	16158.6	17850.5	15075.2	17850.5	18492.5	19453.6
hsa-miR-9*	8183.92	10752.3	5632.5	5339.13	11572.6	7280.75	8137.83	9604.67	3172	11752.5	12191.8	7736.21
hsa-miR-920	174.833	197.375	202.208	155.542	206.583	164.625	149.667	213.875	179.792	208.333	200.042	189.75
hsa-miR-921	165.167	182.292	207.542	159.417	200.042	212.292	171.875	213.875	165.625	203.875	260.167	202.917
hsa-miR-922	239.458	278.042	234.208	250.042	327.625	244.917	218.667	318.75	256.667	244.917	280.875	284.333
hsa-miR-923	2247.33	3172	2774.42	1801.04	1775.38	2406.96	2797.92	2007.88	3020.75	1544.5	1735.17	2211.38
hsa-miR-924	132.75	114.75	121.708	129.708	119.875	109.833	132.208	104.167	124.167	131.208	108.542	116.208
hsa-miR-92a	24730.9	24208.3	25036.5	24208.3	24208.3	24892.9	24208.3	24084.6	25246.3	24504.3	23696.1	24892.9
hsa-miR-92a-1*	7736.21	6466.67	9130.38	8795.08	5339.13	8137.83	7341.29	5380.92	9000.63	3279.83	3218.21	3591.08
hsa-miR-92a-2*	8743.33	8680.42	10576.2	9538.38	6521.08	10494	8743.33	8522.21	11299.9	6020.25	5591.04	6748.96
hsa-miR-92b	26723.5	26558	26723.5	26308.6	24339.8	25850.5	26308.6	26723.5	27134.8	25850.5	26033	26033
hsa-miR-92b*	5825.75	4869.25	6521.08	6935.79	3591.08	5591.04	5440.54	5534.54	8680.42	4385.83	3801.75	4806.33
hsa-miR-93	20720.8	21331	22202.8	20885.9	21036.4	22460	20885.9	21715	23362.8	20720.8	21036.4	22460
hsa-miR-93*	3194.67	2878.21	1884.08	2754.38	3060.21	2729.25	2406.96	2584.38	2285.04	2340.79	2519.25	2247.33
hsa-miR-933	132.75	125.167	140.292	126.5	133.25	113.292	122.875	100.688	127.125	133.875	122.125	127.583
hsa-miR-934	81.7917	79.25	81	94.9167	78.2917	78.875	82.4583	85.5833	81.7917	75.9167	75.1667	78.2917
hsa-miR-935	8627.13	7280.75	10139	8680.42	5187.92	9176.88	9176.88	7341.29	8875.5	8944.25	8303.67	10576.2
hsa-miR-936	147.583	134.583	148.125	150.25	151.542	125.167	143.167	123.583	131.667	137.167	176.833	132.208
hsa-miR-937	47.9167	60.125	49.4167	42.3333	44.2083	46.6667	51.3333	46	51.625	53.7917	77.25	57.9167
hsa-miR-938	241.958	349.833	828.542	243.042	231.917	376.042	581.5	333.708	164.625	113.292	485.083	138.917
hsa-miR-939	6798.54	6935.79	7341.29	7219.79	7049.08	7049.08	7088.46	6521.08	7736.21	6521.08	5973.54	6935.79
hsa-miR-940	5075.33	5187.92	5534.54	5491.71	5075.33	5339.13	5339.13	5075.33	5973.54	5440.54	4869.25	4869.25
hsa-miR-941	5339.13	4481.83	6995.63	6521.08	3393.25	5973.54	5075.33	4481.83	8457.13	5235.54	3688.88	6020.25
hsa-miR-942	7861.13	7687.54	9279.17	8743.33	6466.67	8072.42	8072.42	8339.63	7807.21	7624.75	8183.92	7219.79
hsa-miR-943	744.083	1036.79	1430.08	715.25	1337.75	1544.5	855.542	1203.42	722.167	956.208	1058.92	805.25
hsa-miR-944	138	35.7083	92.2083	60.5417	40	61.7917	204.5	121.125	34.4583	51.9167	99.5417	60.5417
hsa-miR-95	4906.21	5075.33	4950.33	4565.17	6323.42	4677.33	5825.75	5339.13	3503	8183.92	9279.17	6521.08
hsa-miR-96	3233.54	3146.96	2681.54	2481.96	4906.21	3194.67	2556.54	3146.96	2774.42	3558.5	4806.33	3992.58
hsa-miR-96*	167.125	167.625	149.667	151.917	217.833	160.917	162.833	153.792	131.667	195.083	196.75	157.792
hsa-miR-98	18998.6	13083.2	18492.5	21715	11752.5	14532.8	17850.5	15302.7	18998.6	16820.7	15075.2	16158.6
hsa-miR-99a	6081.46	6608.5	5440.54	5285.25	9767.33	5001.21	5751.04	6798.54	5235.54	6798.54	9538.38	6276.46
hsa-miR-99a*	1678.25	1564.79	1469.42	1735.17	1702.04	1775.38	1637.75	1489.08	1606.58	1627.63	1848.63	1775.38
hsa-miR-99b	10853.9	12463	11752.5	10681.9	12913.3	11435.6	10752.3	12316.2	11180.5	11820.9	13196.7	11752.5
hsa-miR-99b*	2977.63	3591.08	3621	2918.58	3255.75	4309.71	3040.63	3748.21	3279.83	3040.63	3558.5	3748.21
solexa-1460-671	3591.08	3801.75	3529.75	4028.33	3445.71	4385.83	3688.88	3653	4385.83	3419.92	3040.63	3474.38
solexa-15-44487	3310.46	3040.63	3060.21	3591.08	3233.54	2681.54	2754.38	3952.42	3621	3084.63	2878.21	2878.21
solexa-2502-366	88.5417	78.5	96.1667	67.2083	89.9167	92.2083	57.4167	89	44.2083	100.688	146.625	91.1042
solexa-2526-361	215.875	122.125	247.167	164.208	179.792	157.292	147.583	189.75	217.125	219.542	263	154.375
solexa-2580-353	57.25	68.0417	35	40.3333	49.7083	38.5	40.3333	73.3333	56.7083	57.9167	49.9167	52.625
solexa-2683-338	926.083	1875.58	1328.17	971.5	4133.17	1735.17	998.167	1884.08	664.958	1449.96	1678.25	1167.71
solexa-2952-306	18014.5	20137.7	20885.9	18240.9	19961.6	21893.8	17580	20465.1	20137.7	18492.5	19211.4	20885.9
solexa-3022-299	1296.58	1378.25	1272.71	1469.42	1041.04	1258.13	1510.67	947.625	1627.63	1303.5	824.208	1386.46
solexa-3044-295	1126.29	689.25	1678.25	1575.83	685.542	1319.79	1036.79	1209.38	1167.71	1126.29	661.833	926.083
solexa-3126-285	1364.38	1397.21	1345.08	1178.75	1345.08	1884.08	1436.46	1419.5	1229.08	1345.08	1863.33	1436.46
solexa-3277-272	553.583	859.25	592.25	485.083	3172	579.042	490.792	759	451.417	569.833	783.667	557.958
solexa-3464-254	15764.5	16473.1	19961.6	16473.1	16820.7	19211.4	15302.7	16473.1	20318	14358.9	14031.9	18726.1
solexa-3695-237	272.958	363.292	483.25	354.583	374.667	520.375	314.5	421.167	298.208	236.667	217.833	192.167
solexa-3793-229	431.208	575.208	676.167	641.167	468.708	689.25	330.708	715.25	1203.42	525.208	344.292	496.292
solexa-3927-221	29807	29807	28630.5	29270.8	29807	29270.8	28079.2	29807	28630.5	28630.5	28630.5	28630.5
solexa-4793-177	8137.83	7144.83	9604.67	9977.33	6798.54	8303.67	8303.67	8627.13	10301.3	7861.13	5632.5	9341
solexa-499-2217	7687.54	8743.33	9538.38	8244.25	8795.08	9832.13	7452.92	9130.38	10752.3	8627.13	7926.92	10301.3
solexa-51-13984	17077.8	12913.3	15302.7	19211.4	7512.08	14723.4	14877.2	5123.92	21715	12591.3	3474.38	14031.9
solexa-5169-164	52.625	81.375	58.375	53.4167	52.375	51.625	51.3333	57.25	55.0417	66.3333	101.25	85.5833
solexa-539-2056	9682.42	7088.46	10985.2	8944.25	6147	9604.67	11299.9	7144.83	10576.2	6212.92	8457.13	7512.08
solexa-555-1991	7926.92	7512.08	8457.13	9065.38	8244.25	8339.63	7624.75	8457.13	8627.13	9065.38	7624.75	8944.25
solexa-5620-151	3146.96	3419.92	3194.67	3474.38	2797.92	4220.71	2918.58	3393.25	2708	3310.46	2556.54	3688.88
solexa-578-1915	3060.21	3952.42	4028.33	4309.71	4093.75	4028.33	3503	4349.88	4177.5	3255.75	3146.96	3718.17
solexa-5874-144	178.542	136.292	140.292	187.75	92.2083	159.417	167.625	134.583	151.542	158.375	151.917	136.292
solexa-603-1846	2375.88	6560.21	4734.08	3839.71	5751.04	5285.25	3172	8183.92	1137.29	4177.5	5884.88	5001.21
solexa-6676-127	140.833	134.583	173.833	202.917	163.625	150.917	270.333	134.583	103.042	170.667	233.125	201.5
solexa-7111-119	121.125	114.75	85.4167	73.3333	103.042	73.3333	72.375	84.0417	75.75	90.4167	67.8333	76.3333
solexa-7297-115	207.542	274.917	166.708	293.75	345.458	220.917	213.125	217.125	261.792	266.417	435.792	295.75
solexa-7509-112	1167.71	1265.71	986.375	1272.71	1251.75	1178.75	1281.25	1242.71	1386.46	1265.71	1120.46	1126.29
solexa-7534-111	632.792	556.083	864.042	676.167	455.5	778	751.792	629.5	832.083	538.792	567.25	581.5
solexa-7764-108	1801.04	909.917	652.292	1242.71	708.625	986.375	1296.58	886.542	926.083	828.542	926.083	741.125
solexa-8000-104	179.792	248.167	119.5	202.917	317.333	210.458	162.833	247.167	205.708	241.083	390.25	259.125
solexa-8048-104	3020.75	3913.88	3558.5	3367.17	2640.83	3419.92	3529.75	3233.54	4734.08	2375.88	2440.04	3218.21
solexa-8211-102	2267.38	4677.33	1691.71	1761.13	11675.5	3653	2389.63	3913.88	1724.29	3060.21	5075.33	2424.58
solexa-826-1288	3172	1939.38	815.75	2854.54	1670.63	3172	2306.42	1173.08	3718.17	1352	952.083	2519.25
solexa-8926-93	851.708	711.667	1436.46	886.542	540.542	1025.71	851.708	697.042	1775.38	778	960.708	1065.29
solexa-9029-92	8680.42	7926.92	8944.25	9279.17	8406	8244.25	8680.42	7452.92	9279.17	7807.21	6560.21	7861.13
solexa-9081-91	1702.04	1660.13	2406.96	2211.38	1184	1606.58	2039.17	2039.17	1884.08	1192.75	1959.25	1510.67
solexa-9124-90	4734.08	4385.83	4906.21	5123.92	4734.08	5075.33	4906.21	4734.08	5440.54	4255.13	4028.33	4481.83
solexa-9578-86	734.583	864.042	722.167	838.125	747.917	771	689.25	689.25	774.625	738.125	648.792	851.708
solexa-9655-85	3218.21	3367.17	4349.88	2999.83	3040.63	4521.96	3255.75	3503	4133.17	3393.25	2797.92	4065.96

## Sheet: CL1-5
ID_CL1-5	CL1-5_0h_1	CL1-5_0h_2	CL1-5_0h_3	CL1-5_1h_1	CL1-5_1h_2	CL1-5_1h_3	CL1-5_4h_1	CL1-5_4h_2	CL1-5_4h_3	CL1-5_24h_1	CL1-5_24h_2	CL1-5_24h_3
HS_1	79.7083	98.5417	101.542	61.0417	46	138.458	126.125	81	76.3333	57.25	89	132.208
HS_10	1959.25	2285.04	1319.79	2355.5	3020.75	2774.42	2519.25	960.708	2519.25	1875.58	2247.33	1386.46
HS_100	22306.3	23362.8	23362.8	22075.7	22781.3	23079.7	22306.3	22916.2	23485.9	21715	22781.3	22781.3
HS_101	73.125	56.0833	55.75	62.1667	51.3333	55.3333	65.375	52.625	49.4167	83.75	73.125	53.7917
HS_104	808.708	966.417	512.958	579.042	774.625	581.5	689.25	824.208	796.208	599.625	531.75	648.792
HS_105	689.25	623	592.25	544.875	689.25	645.5	529.75	487.042	751.792	451.417	632.792	542.958
HS_106	926.083	808.708	701.042	934.125	1288.67	952.083	1114.25	1003.75	934.125	783.667	1076.17	812.125
HS_107	66.0833	61.0417	65.0417	67.8333	60.7917	65.375	75.375	64.6667	83.75	61.0417	65.7917	61.7917
HS_108.1	520.375	1251.75	390.25	783.667	1397.21	711.667	780.208	366.958	708.625	563.75	801.042	503.375
HS_109	117.875	113.708	98.1667	83.1042	92.7917	117.875	63.4583	105.792	126.5	77.125	67.2083	179.792
HS_11.1	127.125	134.583	140.833	136.083	152.5	131.208	128.958	160.917	138	149.167	151.917	144.958
HS_110	1013.42	1436.46	960.708	974.917	1296.58	1209.38	1003.75	891.333	1352	934.125	1209.38	886.542
HS_111	209.625	237.375	174.375	158.625	274	274.917	214.333	195.542	148.542	184.542	226.5	267.208
HS_112	243.042	373.375	396.75	178.542	231	209.625	191.458	325.083	278.042	322.25	286.125	385.042
HS_113	1619.04	1319.79	1312.04	1647.21	1209.38	1386.46	1606.58	1419.5	1152.79	1489.08	1436.46	1008.71
HS_114	796.208	851.708	926.083	1003.75	808.708	947.625	859.25	645.5	867.667	952.083	905.125	755.625
HS_115	67.8333	81.375	57.4167	61.0417	82.0417	79.25	60.7917	58.6667	114.167	57.25	57.25	55.0417
HS_116	641.167	788	692.958	542.958	872.583	926.083	726.083	658.833	722.167	560.292	610.333	681.542
HS_117	280.125	338.042	231	213.125	438.083	388.708	220.167	280.875	326.5	223.208	243.792	308.958
HS_119	297	215.167	271.125	301.958	223.208	261.792	315.958	214.333	214.333	306.208	252.083	210.458
HS_12	228.167	357.667	229.333	195.542	239.458	202.917	330.708	259.125	260.167	235.708	238.667	286.125
HS_120	516.708	896.583	480.125	463.375	859.25	553.583	783.667	612.792	934.125	494.917	668.708	771
HS_121	203.375	159.417	173.292	192.167	152.5	169.083	176.167	182.958	108.542	179.792	166.708	130.208
HS_122.1	215.167	202.208	185.125	200.75	165.625	209.625	192.833	187.208	157.792	182.958	246.5	161.292
HS_123	330.708	400.917	317.333	328.708	347.042	277	265.625	352.25	193.5	277	364.542	271.125
HS_124	40.3333	37.9583	37.9583	42.625	61.7917	40.8333	54.0417	52.625	43.2083	40.3333	40	40.8333
HS_126	1825.25	1724.29	2454.88	1097.75	1670.63	1713	1619.04	2195.04	1702.04	1627.63	1951.96	2195.04
HS_127.1	109.542	89.5833	109.542	116.667	127.583	109.125	92.5	101.542	57.9167	112.833	89	74.5417
HS_128	478.708	584.125	531.75	492.792	599.625	595.458	463.375	505.792	664.958	499	391.875	546.833
HS_129	108.208	111.833	98.1667	117.875	164.208	107	124.167	120.333	83.75	112.833	105.792	98.5417
HS_13	538.792	480.125	410.042	303.167	451.417	492.792	284.333	295.75	159.917	470.917	455.5	364.542
HS_130	218.667	221.833	280.875	186.417	198.917	264.792	230.125	256.667	176.833	189.75	279.083	277
HS_131	510.875	467.167	432.958	385.042	378.25	496.292	459.25	390.25	468.708	272.958	299.708	610.333
HS_132.1	1152.79	1875.58	1065.29	1217.33	2306.42	1875.58	1951.96	1223.58	3279.83	1152.79	1979.04	1951.96
HS_133.1	325.083	327.625	312	337.042	427.708	292.625	314.5	322.25	396.75	312	299.708	240.333
HS_134	211.042	243.042	254.042	185.125	215.167	229.333	174.833	180.75	354.583	314.5	319.833	444.583
HS_135	94.1042	90.7083	122.125	100.688	148.125	85.9583	94.375	103.042	140.292	114.75	105.792	111.833
HS_136	297	215.167	236.667	265.625	293.75	195.083	250.667	229.333	319.833	150.917	196	217.125
HS_137	60.7917	70.2917	63.75	71.4583	78.2917	64.4167	68.7917	68.0417	67.2083	63.0417	71.125	61.7917
HS_138	549.708	542.958	556.083	505.792	478.708	515.042	557.958	525.208	510.875	529.75	557.958	483.25
HS_139	3194.67	3194.67	3109.54	3146.96	2824.46	3172	3040.63	3020.75	3109.54	2618.96	3310.46	2774.42
HS_14.1	159.917	170.208	171.875	187.208	159.917	170.667	191.458	165.625	295.75	157.792	210.458	200.75
HS_140	159.917	176.833	124.167	149.167	104.958	173.833	162.333	109.833	257.875	149.167	217.125	123.583
HS_141	429.375	404.5	400.917	485.083	358.833	421.167	468.708	348.5	326.5	520.375	494.917	394.042
HS_142.1	780.208	747.917	661.833	747.917	1103.96	1031.17	824.208	717.125	788	606.917	952.083	916.083
HS_143	66.0833	50.75	82.7917	61.0417	52.625	52.625	77.25	70.2917	49.4167	58.375	82.7917	45.75
HS_144	171.875	190.625	205.208	197.375	169.792	192.833	206.583	136.292	198	155.542	212.292	156.708
HS_145.1	979.792	876.375	900.083	979.792	788	991.875	1053.54	876.375	905.125	960.708	921.708	755.625
HS_146.1	87.375	94.375	91.625	95.7917	87.125	84.8542	87.7083	97.8542	85.4167	85.4167	119.875	81.7917
HS_147	579.042	652.292	685.542	503.375	542.958	625.792	595.458	676.167	711.667	423.333	515.042	636.458
HS_149	6081.46	7396.63	5285.25	4565.17	6212.92	7584.58	7088.46	4093.75	6682.79	5491.71	7144.83	7584.58
HS_15.1	166.167	180.75	221.833	124.167	127.583	313.042	170.208	174.833	726.083	192.833	342.875	236.667
HS_150	3474.38	3529.75	3529.75	3869.08	3529.75	3591.08	3748.21	2955.88	3529.75	3310.46	3718.17	2824.46
HS_151.1	195.542	203.875	252.083	181.667	261.792	149.667	189.75	198	190.958	183.375	206.583	206.583
HS_152	3172	2519.25	2640.83	3233.54	2066.54	2519.25	3255.75	2440.04	2306.42	3109.54	2681.54	1895.04
HS_153	741.125	685.542	796.208	661.833	571.875	641.167	661.833	681.542	516.708	652.292	701.042	606.917
HS_154	86.4583	103.563	55.75	69.25	89.9167	113.292	67.375	57.25	83.75	79.25	82.7917	80.1667
HS_155	100.083	155	117.875	94.1042	92.7917	128.625	114.167	105.792	138	107.646	96.1667	187.208
HS_156	838.125	1713	761.625	864.042	2454.88	1167.71	1397.21	1178.75	2066.54	681.542	1345.08	820.875
HS_157	708.625	715.25	579.042	516.708	846.5	744.083	612.792	587.917	1145.79	553.583	715.25	841.833
HS_159	83.1042	101.25	73.6667	78.2917	75.375	87.125	85.9583	83.75	76.3333	104.958	73.125	76.3333
HS_16	77.25	72.6667	80.1667	81.7917	82.0417	72.375	74.0417	78.2917	80.1667	80.4167	101.542	83.1042
HS_160	1178.75	1251.75	1126.29	1265.71	1025.71	1229.08	1120.46	1087.71	1082.25	1251.75	1449.96	1031.17
HS_161	82.4583	70.8333	76.3333	71.4583	82.0417	75.1667	71.4583	71.9583	68.7917	67.2083	65.7917	75.1667
HS_162	63.0417	61.0417	58.6667	63.4583	58.375	55.3333	65.375	64.6667	55.3333	67.2083	61.0417	56.7083
HS_163	2774.42	3591.08	2708	2039.17	5235.54	3801.75	3653	2355.5	5534.54	2066.54	3801.75	3172
HS_164	121.708	70.8333	81.7917	78.2917	70.8333	102.583	81.375	94.1042	78.5	77.125	74.0417	100.083
HS_166.1	991.875	867.667	986.375	801.042	793.083	1031.17	880.792	905.125	715.25	824.208	846.5	891.333
HS_167.1	563.75	546.833	584.125	478.708	536.375	606.917	461.042	604	717.125	455.5	632.792	629.5
HS_168	475.75	350.667	404.5	496.292	368.292	439.917	478.708	557.958	300.75	483.25	451.417	274.917
HS_169	410.042	546.833	523.208	390.25	571.875	612.792	402.583	538.792	560.292	280.125	494.917	661.833
HS_17	1251.75	2026.13	1489.08	952.083	1533.79	1533.79	1476.83	1303.5	1713	793.083	1234.33	1575.83
HS_170	681.542	1031.17	536.375	415.583	708.625	664.958	681.542	632.792	661.833	505.792	641.167	778
HS_174.1	132.208	211.708	187.75	178.542	150.25	169.083	227.375	512.958	120.583	213.125	178.167	249.208
HS_175	492.792	587.917	473.708	429.375	446.417	525.208	503.375	457.5	435.792	413.333	465.333	473.708
HS_176	540.542	529.75	468.708	557.958	523.208	354.583	615.542	567.25	439.917	417.125	470.917	529.75
HS_177	421.167	314.5	354.583	494.917	271.875	327.625	453.542	304.75	306.208	485.083	290	279.083
HS_179	113.292	111.833	105.375	109.542	107.646	109.542	103.563	100.083	146.125	92.7917	103.563	127.125
HS_18	288.292	358.833	221.833	408.458	483.25	249.208	307.375	315.958	295.75	217.125	202.917	291.667
HS_182.1	378.25	531.75	385.042	308.958	473.708	461.042	435.792	278.042	641.167	261.792	334.417	463.375
HS_183.1	52.625	58.375	49	37.9583	44.625	42.3333	38.5	43.2083	44.625	39.125	35	49.7083
HS_184	2655.71	2424.58	2977.63	2729.25	2195.04	2955.88	2918.58	1991.92	2824.46	2708	2355.5	2999.83
HS_185.1	66.0833	59.5417	55.75	59.5417	59.7917	55.3333	57.4167	63.0417	51.625	55.75	61.0417	46.6667
HS_186	1749.21	1660.13	2556.54	1419.5	1460.42	1939.38	1126.29	2754.38	1619.04	2120.92	2195.04	2267.38
HS_187	158.375	176.167	159.917	125.167	133.25	188.417	151.542	226.5	97.8542	143.167	136.083	174.375
HS_188	2285.04	2319.33	1895.04	1553.63	1923.88	2306.42	1660.13	1775.38	2100.17	1476.83	1825.25	2539.25
HS_189.1	113.292	126.125	108.542	150.917	138.917	132.75	119.875	128.625	203.875	140.833	126.125	115.875
HS_19	1991.92	1761.13	1991.92	1939.38	1735.17	2007.88	2172.21	1533.79	1637.75	2100.17	1544.5	1863.33
HS_190	164.625	146.625	138.917	108.542	145.333	138.458	105.375	138.917	125.167	107.646	136.292	140.833
HS_192.1	22592.8	19453.6	24208.3	21331	15509.2	13083.2	21633.3	23485.9	6521.08	23231.5	22202.8	22592.8
HS_193	186.417	247.167	285.5	166.708	378.25	188.417	240.333	259.125	235.708	146.625	238.667	260.167
HS_194	140.833	198	151.542	158.625	270.333	234.833	246.5	135.417	254.958	124.167	208.333	199.5
HS_195	113.292	167.125	113.708	126.5	158.375	152.5	165.167	140.833	146.125	142.542	178.167	151.917
HS_196.1	2007.88	2895.88	1959.25	1786.58	2681.54	2797.92	3109.54	2052	3952.42	1619.04	2235.75	2481.96
HS_197	272.958	487.042	322.25	286.125	341.5	364.542	293.75	295.75	438.083	269.25	361.583	263
HS_198	117.875	161.875	73.6667	105.375	313.042	148.125	255.708	84.375	132.208	67.2083	174.833	103.563
HS_199	632.792	505.792	604	584.125	457.5	515.042	485.083	510.875	364.542	478.708	501.667	435.792
HS_2	1419.5	1288.67	1397.21	1114.25	1058.92	1337.75	1312.04	1272.71	1597.33	1053.54	960.708	1223.58
HS_20	1296.58	1469.42	1564.79	1272.71	1312.04	1575.83	1319.79	1217.33	1460.42	1265.71	1378.25	1430.08
HS_200	365.958	494.917	379.875	347.042	361.583	431.208	394.042	337.042	246.5	327.625	297	366.958
HS_201	229.333	284.333	294.583	286.125	347.042	325.083	263.792	239.458	461.042	254.042	353.417	265.625
HS_202.1	290	365.958	284.333	233.125	280.125	217.125	236.667	292.625	217.125	255.708	229.333	155
HS_203	851.708	685.542	685.542	778	673.125	636.458	734.583	715.25	584.125	656.208	744.083	429.375
HS_204.1	18492.5	20465.1	21331	19643.8	19821.5	21036.4	18726.1	20465.1	21036.4	18492.5	20465.1	21196.3
HS_205.1	237.375	266.417	238.667	266.417	239.458	253.042	271.125	220.167	330.708	274.917	244.917	390.25
HS_206	270.333	294.583	235.708	257.875	360.125	323.625	243.792	198.917	190.958	186.417	196	451.417
HS_208	465.333	327.625	378.25	344.292	333.708	357.667	277	381.667	202.208	266.417	368.292	339.333
HS_209.1	6020.25	5928.46	4950.33	6147	5491.71	2824.46	5591.04	6995.63	3801.75	6212.92	4906.21	3194.67
HS_21	190.958	173.292	130.208	142.042	145.333	158.625	153.792	164.208	155	143.167	152.958	166.708
HS_211	97.2917	101.25	110.917	105.792	114.75	105.375	93.4792	108.208	96.1667	98.9583	114.75	89
HS_215	234.833	208.333	203.375	202.917	226.5	263.792	203.875	215.167	417.125	174.833	285.5	219.542
HS_216	60.7917	66.0833	69.375	66.3333	68.4583	70.8333	60.7917	68.0417	76.3333	67.2083	63.0417	73.3333
HS_217	92.2083	65.375	69.375	95.7917	149.167	167.125	105.375	82.4583	292.625	120.583	92.5	109.125
HS_218	51.625	54.0417	55.75	55.3333	58.375	53.7917	95.7917	61.0417	62.5833	51.3333	55.75	67.375
HS_219	729.5	520.375	645.5	708.625	501.667	581.5	685.542	592.25	492.792	704.625	658.833	501.667
HS_22.1	1837.08	2007.88	2080.83	1702.04	1951.96	2039.17	2340.79	1786.58	2556.54	1951.96	1959.25	1959.25
HS_220	134.75	117.417	126.125	120.583	100.167	104.167	112.333	118.333	87.125	134.583	112.333	89
HS_221	156.708	134.583	157.792	122.125	239.458	172.458	132.75	170.667	135.417	151.917	156.708	208.833
HS_228.1	131.208	101.25	189.75	127.917	142.542	214.333	187.75	133.875	527.583	154.375	104.958	182.958
HS_23	327.625	354.583	323.625	370.125	355.792	384	344.292	345.458	312	330.708	512.958	218.667
HS_231	184.542	179.125	213.125	181.667	234.833	322.25	185.792	217.833	282.167	177.25	217.125	190.958
HS_232	399.75	459.25	394.042	381.667	612.792	508.708	490.792	395.25	575.208	259.125	544.875	404.5
HS_239	1875.58	1678.25	2235.75	1597.33	1606.58	2120.92	1564.79	1884.08	1837.08	1724.29	1895.04	2120.92
HS_24	3653	4806.33	3419.92	3992.58	5884.88	4906.21	5075.33	3146.96	7049.08	4028.33	4906.21	4349.88
HS_240	154.375	235.708	185.125	238.208	200.75	274.917	157.792	218.667	201.5	174.833	161.875	229
HS_241.1	956.208	1094.04	1013.42	656.208	1031.17	971.5	708.625	1013.42	900.083	717.125	681.542	1209.38
HS_242	254.958	146.625	163.625	269.25	243.042	300.75	260.167	280.125	257.875	280.125	113.292	249.208
HS_243.1	6276.46	8137.83	5928.46	5075.33	7280.75	6935.79	6147	5285.25	5339.13	5440.54	8244.25	7088.46
HS_244	4065.96	3952.42	4255.13	4349.88	4065.96	4133.17	4028.33	3869.08	4349.88	4521.96	5001.21	3748.21
HS_25	793.083	956.208	966.417	780.208	780.208	1159.67	947.625	726.083	1272.71	841.833	738.125	991.875
HS_250	567.25	510.875	599.625	421.167	641.167	475.75	503.375	536.375	391.875	549.708	459.25	534.25
HS_251.1	163.625	144.958	151.542	166.708	145.333	161.292	171.875	128.958	142.542	150.917	173.292	161.292
HS_252.1	463.375	350.667	370.125	459.25	327.625	423.333	470.917	413.333	338.042	455.5	432.958	301.958
HS_253	74.875	62.1667	75.75	70.625	63.75	62.5833	58.6667	71.9583	62.5833	64.4167	64.1667	66.3333
HS_254	556.083	457.5	508.708	337.042	487.042	510.875	538.792	503.375	820.875	315.958	384	581.5
HS_255	374.667	376.042	330.708	298.208	419	398.375	387.167	360.125	516.708	238.208	223.208	272.958
HS_257	704.625	780.208	668.708	253.042	520.375	783.667	567.25	370.125	780.208	658.833	971.5	966.417
HS_258	49.9167	54.0417	67.375	59.5417	64.6667	62.5833	75.375	68.0417	108.542	54.0417	57.25	90.7083
HS_26.1	169.792	185.792	166.167	203.375	257.875	232.583	210.458	157.792	240.333	174.833	139.417	229
HS_260	7861.13	7219.79	8072.42	6798.54	6748.96	8244.25	5973.54	6798.54	6276.46	7088.46	6682.79	8627.13
HS_261.1	166.167	223.208	129.708	132.208	198	198.917	203.875	155.542	396.75	159.917	203.875	226.5
HS_262.1	952.083	1041.04	926.083	896.583	1008.71	1008.71	891.333	942.375	1070.38	872.583	1003.75	832.083
HS_263.1	6682.79	8339.63	6466.67	5491.71	7396.63	7687.54	6935.79	6020.25	6020.25	5751.04	7219.79	7049.08
HS_264.1	54.3333	56.0833	60.125	56.0833	54.0417	57.25	55.3333	55.0417	60.5417	52.625	55.0417	64.1667
HS_265.1	425.583	536.375	410.042	478.708	432.958	459.25	531.75	534.25	358.833	455.5	415.583	492.792
HS_266.1	48.7917	94.375	57.4167	46	64.6667	77.25	84.8542	51.1667	157.792	61.0417	45.3333	49.7083
HS_267	194.208	176.833	163.625	178.542	186.417	159.917	158.375	157.792	208.833	162.333	176.833	182.958
HS_268	1460.42	1110.08	1087.71	1296.58	947.625	1087.71	1229.08	1132.88	771	1097.75	1209.38	711.667
HS_269	149.167	148.542	109.542	126.5	124.5	146.625	125.167	122.125	159.917	120.583	133.25	103.563
HS_27	905.125	711.667	896.583	828.542	656.208	726.083	755.625	801.042	499	896.583	867.667	689.25
HS_273	272.958	319.833	250.667	274	282.167	265.625	326.5	150.25	334.417	250.042	223.208	233.125
HS_275	5534.54	5973.54	6212.92	6020.25	5825.75	6276.46	6409.96	5123.92	6409.96	5825.75	6081.46	6276.46
HS_276.1	1132.88	1352	1025.71	1013.42	1065.29	1070.38	1103.96	986.375	1094.04	1031.17	947.625	934.125
HS_278	63.0417	94.375	54.0417	76.3333	60.7917	80.4167	51.9167	61.0417	51.625	59.5417	53.7917	67.375
HS_279_a	726.083	581.5	645.5	771	604	697.042	618.75	531.75	483.25	641.167	661.833	520.375
HS_280_a	534.25	404.5	503.375	529.75	317.333	328.708	571.875	453.542	330.708	516.708	395.25	395.25
HS_280_b	417.125	394.042	334.417	249.208	384	319.833	384	370.125	164.625	298.208	265.625	318.75
HS_282	360.125	387.167	354.583	304.75	288.292	341.5	277	421.167	231	308.958	358.833	371.542
HS_283_a	234.833	275.917	203.375	241.083	277	223.208	230.125	228.167	178.167	250.667	293.75	231
HS_283_b	45.75	50.75	39.125	46	37.0833	49.9167	42.625	36.375	62.5833	45.75	32.9167	65.7917
HS_284	56.0833	68.7917	52.9167	53.4167	55.75	52.625	54.0417	57.25	55.3333	54.0417	55.75	46.6667
HS_284.1	1884.08	2440.04	3146.96	1619.04	1761.13	2999.83	1713	1670.63	2481.96	1430.08	1553.63	2584.38
HS_285	867.667	1065.29	952.083	744.083	926.083	855.542	846.5	1053.54	960.708	867.667	909.917	1114.25
HS_286_a	56.0833	94.375	81.7917	66.3333	94.9167	60.125	72.6667	92.5	49.4167	49.9167	51.625	53.7917
HS_287	21893.8	21893.8	21504.6	19453.6	21893.8	21715	22202.8	21504.6	21633.3	22075.7	23231.5	22916.2
HS_29	905.125	1735.17	1058.92	692.958	2155.63	3194.67	1553.63	385.042	2267.38	692.958	1058.92	1013.42
HS_3	340.167	353.417	265.625	220.167	333.708	368.292	268.25	247.167	317.333	227.375	337.042	355.792
HS_30	71.9583	72.6667	67.375	75.1667	98.1667	80.4167	67.375	64.6667	166.708	80.4167	81.375	61.7917
HS_303_a	3913.88	3869.08	4309.71	3172	3558.5	3218.21	3801.75	3367.17	2854.54	3869.08	3992.58	4065.96
HS_303_b	595.458	891.333	629.5	715.25	1076.17	880.792	715.25	427.708	692.958	575.208	832.083	652.292
HS_304_a	425.583	358.833	374.667	415.583	265.625	435.792	365.958	327.625	298.208	358.833	331.542	321.042
HS_304_b	263	252.083	358.833	221.833	308.958	274.917	263	423.333	465.333	246.5	259.125	226.5
HS_305_b	307.375	292.625	291.667	274.917	629.5	368.292	250.667	263	402.583	179.125	173.292	455.5
HS_31.1	435.792	410.042	618.75	470.917	443.25	673.125	494.917	575.208	966.417	581.5	567.25	569.833
HS_32	4420.67	6323.42	4349.88	3718.17	4626.25	4677.33	3952.42	4734.08	4177.5	3718.17	3839.71	4093.75
HS_33	668.708	629.5	661.833	668.708	625.792	658.833	592.25	549.708	523.208	494.917	549.708	625.792
HS_35	333.708	441.875	312	342.875	896.583	448.333	439.917	354.583	272.958	208.833	404.5	268.25
HS_36.1	166.167	208.333	119.5	126.5	191.458	115.875	224.75	203.875	123.583	158.625	155.542	138.917
HS_37	250.042	192.833	191.458	171.875	326.5	158.625	155	195.542	128.625	176.167	252.083	196.75
HS_38.1	2519.25	2340.79	2267.38	2340.79	2039.17	2267.38	2355.5	2134.13	2052	2039.17	2424.58	1923.88
HS_4.1	197.375	202.208	179.125	171.333	301.958	350.667	205.208	209.625	272.958	181.292	280.875	208.833
HS_40	1345.08	979.792	1082.25	1251.75	1036.79	1378.25	1436.46	921.708	1587.54	1449.96	886.542	1094.04
HS_41	57.9167	44.625	48.25	49.7083	50.2917	43.5417	48.7917	45.3333	49.4167	46.6667	70.2917	42.625
HS_42	778	661.833	697.042	909.917	584.125	738.125	805.25	704.625	1087.71	1019.92	793.083	546.833
HS_43.1	192.833	151.917	152.5	183.375	204.5	162.833	165.167	177.25	128.625	162.333	190.625	106.417
HS_44.1	47.0417	46.6667	51.1667	67.8333	55.0417	53.7917	58.6667	48.7917	60.5417	54.0417	58.6667	58.375
HS_45.1	461.042	322.25	286.125	354.583	327.625	400.917	342.875	378.25	265.625	299.708	314.5	373.375
HS_46	104.958	123.583	140.833	147.583	239.458	165.625	89	138.917	268.25	124.167	68.7917	166.708
HS_47	192.833	146.625	177.75	178.542	142.542	167.125	196	172.458	149.167	173.292	179.792	165.625
HS_48.1	934.125	1281.25	1019.92	846.5	1217.33	1103.96	1025.71	1209.38	1258.13	937.875	1167.71	1364.38
HS_49	438.083	431.208	385.042	349.833	538.792	704.625	534.25	254.958	755.625	379.875	395.25	715.25
HS_5.1	5380.92	5700.38	3952.42	4220.71	4950.33	3913.88	4869.25	4677.33	3653	3367.17	3913.88	4309.71
HS_50	59.7917	117.417	75.1667	78.2917	68.4583	79.25	68.7917	70.8333	68.7917	102	73.125	64.1667
HS_51	168.333	200.75	155	144.542	176.833	149.667	138.917	118.333	115.875	152.958	166.708	176.833
HS_52	2797.92	3060.21	3445.71	3109.54	2999.83	3529.75	2797.92	2618.96	3591.08	2497.5	3393.25	3279.83
HS_53	203.375	211.708	267.208	142.042	261.792	165.625	183.375	250.042	399.75	130.583	256.667	361.583
HS_54	448.333	599.625	652.292	394.042	796.208	1065.29	339.333	390.25	766.958	459.25	473.708	373.375
HS_55	129.708	213.125	121.708	95.7917	229.333	156.167	161.292	142.542	228.167	142.042	182.292	163.625
HS_55.1	138.458	149.667	120.583	136.083	106.417	164.208	131.667	172.458	130.208	98.9583	123.583	136.292
HS_56	178.167	185.792	198	180.75	229.333	176.167	187.75	182.292	182.958	177.25	213.875	202.917
HS_57.1	101.25	85.4167	98.1667	113.708	85.4167	100.083	94.375	82.4583	157.792	87.7083	78.0417	94.9167
HS_58	161.875	227.375	105.375	95.7917	219.542	113.292	184.542	160.917	167.625	114.75	199.5	203.875
HS_59	97.2917	107.646	86.7708	92.2083	77.25	75.1667	110.917	97.8542	73.3333	93.8333	93.8333	86.7708
HS_6	2172.21	2211.38	1884.08	1126.29	2100.17	1923.88	1637.75	1489.08	1923.88	1319.79	1735.17	2355.5
HS_60	451.417	615.542	453.542	515.042	658.833	629.5	542.958	448.333	828.542	400.917	715.25	423.333
HS_61	47.0417	50.75	46	47.0417	52.625	46	49.9167	47.5833	157.792	43.2083	62.1667	44.2083
HS_62	283.458	310.667	321.042	195.542	292.625	202.917	508.708	201.5	230.125	344.292	399.75	510.875
HS_63	201.5	179.125	186.417	225.75	166.708	143.167	194.208	183.917	138	195.542	146.125	163.625
HS_64	218.667	264.792	120.583	210.458	250.667	165.625	161.292	191.458	179.792	125.5	156.708	247.167
HS_65	761.625	937.875	531.75	396.75	805.25	652.292	1087.71	820.875	664.958	510.875	778	461.042
HS_66	39.125	39.125	41.7917	40.3333	42.3333	37.9583	41.2917	41.7917	40.8333	39.125	42.3333	52.9167
HS_67	52.625	61.0417	51.1667	53.4167	49.4167	64.4167	64.4167	51.1667	53.7917	49	48.7917	49.7083
HS_68	1364.38	1419.5	1209.38	909.917	1110.08	1533.79	1408.92	1152.79	1047.54	1114.25	1265.71	1152.79
HS_69	35	35.7083	36.375	35	32.9167	34.4583	35	38.5	35	34.4583	35	34.4583
HS_7	606.917	496.292	542.958	569.833	396.75	463.375	606.917	581.5	470.917	604	432.958	516.708
HS_70	59.7917	70.8333	52.375	57.25	45.3333	65.375	64.4167	49.7083	81	49	78.0417	61.7917
HS_71.1	2306.42	1951.96	2066.54	2100.17	1619.04	2285.04	2285.04	1702.04	2026.13	2211.38	1923.88	1761.13
HS_72	237.375	257.875	249.208	200.75	184.542	246.5	271.875	235.708	203.875	156.167	147.167	282.167
HS_73.1	138.458	187.75	147.167	115.167	177.25	115.875	149.667	148.542	161.292	128.958	128.625	172.458
HS_74	182.958	229	215.875	155.542	200.75	181.667	207.542	224.75	121.708	147.583	182.292	300.75
HS_75.1	413.333	339.333	318.75	322.25	399.75	505.792	396.75	290.708	529.75	319.833	293.75	444.583
HS_76	147.167	133.25	183.375	118.875	109.833	143.792	133.875	234.208	105.375	109.125	142.042	288.292
HS_77	92.7917	90.7083	89	90.4167	162.333	138.458	121.125	87.375	62.5833	112.833	154.375	147.583
HS_78	1065.29	1378.25	1288.67	947.625	1234.33	1223.58	1303.5	1544.5	1265.71	891.333	937.875	1120.46
HS_79.1	241.083	347.042	268.25	328.708	225.75	339.333	270.333	304.75	448.333	238.208	322.25	313.042
HS_8	283.458	190.625	254.958	246.5	323.625	271.125	230.125	240.333	249.208	230.125	256.667	235.708
HS_80	220.167	226.5	257.875	225.75	187.75	236.667	194.208	244.917	348.5	259.125	231	280.125
HS_81	3040.63	2584.38	2797.92	2977.63	2172.21	2655.71	3194.67	2155.63	2584.38	2918.58	2655.71	2285.04
HS_82.1	133.875	234.208	131.667	124.167	394.042	198.917	286.125	136.292	290	110.292	196	138.917
HS_83.1	96.1667	80.1667	92.7917	87.125	80.4167	64.4167	87.7083	82.4583	82.0417	70.625	100.083	72.375
HS_84	175.333	139.417	136.083	185.125	136.083	154.375	177.75	138.917	119.5	167.125	162.833	127.125
HS_85.1	148.125	129.708	163.625	148.125	117.875	150.917	108.208	123.583	103.042	103.563	140.833	127.125
HS_86	266.417	269.25	306.208	280.875	295.75	278.042	260.833	317.333	260.167	279.083	275.917	280.125
HS_87	89.5833	78.5	71.125	83.1042	73.125	117.875	115.167	119.5	174.833	75.75	96.1667	95.3333
HS_88	92.7917	82.7917	58.6667	59.5417	64.6667	87.125	96.7083	73.3333	53.7917	67.2083	136.292	89
HS_89	154.375	143.167	138.917	153.792	180.208	202.208	130.583	150.25	130.208	111.833	126.125	127.125
HS_9	269.25	255.708	208.833	155.542	333.708	304.75	321.042	237.375	376.042	225.75	220.167	347.042
HS_90	225.75	167.125	225.75	244.917	162.333	260.833	238.208	190.958	159.917	266.417	248.167	176.833
HS_91.1	3218.21	4065.96	3172	2155.63	3109.54	4177.5	2584.38	1939.38	3558.5	1923.88	3340.33	4177.5
HS_92	119.875	174.833	134.75	142.042	182.958	179.792	153.792	125.5	211.708	136.083	173.292	156.708
HS_93	144.958	199.5	155	149.167	131.208	148.125	149.167	140.833	244.917	132.208	189.25	186.417
HS_94	2481.96	1597.33	3218.21	1951.96	1510.67	1825.25	1786.58	2655.71	808.708	3040.63	2267.38	2389.63
HS_95	67.8333	67.375	75.75	65.375	70.8333	75.1667	62.1667	70.8333	82.0417	78.0417	64.1667	83.1042
HS_96	11675.5	13196.7	13360	11752.5	12463	12771.5	12771.5	10853.9	11675.5	12463	14031.9	11951.4
HS_97	2155.63	1825.25	1908.63	2052	1597.33	2155.63	2424.58	1564.79	2340.79	2195.04	1884.08	1908.63
HS_99.1	744.083	676.167	876.375	689.25	618.75	741.125	629.5	805.25	623	636.458	766.958	824.208
hsa-let-7a	28079.2	29807	28630.5	28079.2	29270.8	29270.8	29270.8	28630.5	29270.8	28630.5	29270.8	28079.2
hsa-let-7a*	832.083	501.667	838.125	1364.38	468.708	378.25	828.542	701.042	298.208	1281.25	557.958	384
hsa-let-7b	17580	18998.6	18998.6	18998.6	19643.8	19961.6	18014.5	16158.6	20720.8	17077.8	19211.4	19453.6
hsa-let-7b*	8137.83	8627.13	6798.54	5973.54	7926.92	9000.63	8680.42	6147	9234.96	6850.42	8627.13	8339.63
hsa-let-7c	21633.3	23231.5	20885.9	23079.7	23231.5	23362.8	22916.2	19211.4	24339.8	22592.8	23362.8	21036.4
hsa-let-7c*	86.4583	82.7917	80.1667	87.125	85.4167	85.9583	90.4167	81	92.2083	89.25	85.4167	93.8333
hsa-let-7d	19453.6	21331	19643.8	21196.3	21504.6	22202.8	20720.8	17850.5	22592.8	19961.6	20885.9	20465.1
hsa-let-7d*	10077.5	11820.9	9387.54	8457.13	10985.2	11435.6	11180.5	8580.13	11299.9	9130.38	12771.5	10212.5
hsa-let-7e	24605.3	26558	25454.9	27452.7	27134.8	27134.8	27452.7	23079.7	28079.2	26426.8	26426.8	26033
hsa-let-7e*	1678.25	1619.04	1848.63	1979.04	1908.63	1959.25	1460.42	1647.21	2319.33	1553.63	1223.58	2211.38
hsa-let-7f	24208.3	24730.9	25036.5	25036.5	24084.6	25036.5	25246.3	23231.5	24605.3	25454.9	25147.9	24339.8
hsa-let-7f-1*	1660.13	1500.13	1500.13	1959.25	1419.5	685.542	1223.58	1110.08	525.208	1352	692.958	439.917
hsa-let-7f-2*	266.417	205.708	274	162.833	206.583	219.542	166.167	252.083	214.333	178.167	182.292	408.458
hsa-let-7g	26426.8	26308.6	26915.8	26915.8	25606.6	26426.8	26915.8	26194.6	25606.6	26194.6	27452.7	25850.5
hsa-let-7g*	74.875	126.125	90.4167	129.708	116.208	73.3333	103.563	82.4583	121.708	82.4583	89	102
hsa-let-7i	23485.9	24084.6	23970.2	23826.3	23970.2	25147.9	23696.1	23826.3	24892.9	24084.6	24605.3	23362.8
hsa-let-7i*	1337.75	606.917	441.875	1025.71	508.708	689.25	1281.25	575.208	676.167	97.8542	148.542	1097.75
hsa-miR-1	49.9167	45.75	52.9167	75.75	42.3333	49.9167	47.9167	54.0417	66.0833	92.2083	53.7917	51.1667
hsa-miR-100	25246.3	25147.9	25606.6	25454.9	25246.3	23696.1	25147.9	26915.8	23970.2	25606.6	24339.8	24730.9
hsa-miR-100*	1070.38	1749.21	1637.75	1775.38	1328.17	1775.38	855.542	1337.75	1036.79	828.542	618.75	536.375
hsa-miR-101	891.333	876.375	846.5	1597.33	1082.25	966.417	1094.04	1126.29	952.083	1041.04	1184	708.625
hsa-miR-101*	81	83.75	92.7917	85.5833	119.875	88.5417	95.7917	77.125	133.25	80.4167	75.375	76.3333
hsa-miR-103	8795.08	8944.25	9832.13	10494	9538.38	9682.42	8875.5	9682.42	9977.33	9682.42	9682.42	9130.38
hsa-miR-105	6608.5	6682.79	7219.79	6995.63	6608.5	7396.63	6521.08	8303.67	8627.13	7861.13	7088.46	7736.21
hsa-miR-105*	231.917	221.833	257.875	249.208	221.833	253.042	174.375	234.208	238.208	202.917	237.375	238.208
hsa-miR-106a	10212.5	10212.5	10301.3	11180.5	11180.5	10853.9	10681.9	11752.5	10985.2	11435.6	11752.5	9682.42
hsa-miR-106a*	86.4583	88.1042	84.0417	98.1667	91.1042	73.3333	90.4167	96.1667	64.1667	83.1042	108.542	80.1667
hsa-miR-106a:9.1	310.667	265.625	310.667	364.542	344.292	229.333	280.125	314.5	162.833	303.167	234.208	189.25
hsa-miR-106b	10382	11180.5	9767.33	11435.6	11299.9	10382	11435.6	12053.3	10494	11752.5	10853.9	8795.08
hsa-miR-106b*	7736.21	6995.63	8522.21	7396.63	6682.79	8072.42	6212.92	7807.21	8522.21	7986.71	6466.67	9000.63
hsa-miR-107	1430.08	1152.79	1597.33	2375.88	1521	1702.04	1364.38	1863.33	1419.5	1761.13	1510.67	1884.08
hsa-miR-10a	10681.9	8795.08	10212.5	12591.3	8303.67	6682.79	10494	11675.5	6212.92	14723.4	9176.88	7396.63
hsa-miR-10a*	2584.38	2100.17	2618.96	4093.75	1875.58	1500.13	2754.38	2519.25	676.167	4806.33	2955.88	1775.38
hsa-miR-10b	327.625	220.167	357.667	284.333	178.167	200.042	254.042	435.792	116.667	494.917	278.042	284.333
hsa-miR-10b*	134.75	138	127.917	152.5	152.5	129.708	136.292	144.958	145.333	162.333	144.542	140.833
hsa-miR-1178	234.833	255.708	183.917	150.917	215.167	134.583	185.792	110.917	67.2083	200.75	269.25	234.833
hsa-miR-1179	106.417	179.125	125.5	98.1667	145.333	161.875	118.333	140.833	70.8333	148.125	138.458	96.7083
hsa-miR-1180	2267.38	2655.71	2481.96	2878.21	2519.25	3393.25	2497.5	1606.58	4093.75	3146.96	3474.38	3503
hsa-miR-1181	859.25	905.125	805.25	525.208	1070.38	1114.25	717.125	734.583	855.542	584.125	788	1184
hsa-miR-1182	89.5833	85.4167	104.167	86.4583	133.25	152.5	142.042	101.542	126.5	94.375	90.7083	125.167
hsa-miR-1183	385.042	331.542	215.875	231.917	365.958	432.958	444.583	247.167	563.75	255.708	379.875	385.042
hsa-miR-1184	1025.71	855.542	841.833	966.417	783.667	1019.92	1031.17	859.25	1749.21	942.375	805.25	956.208
hsa-miR-1185	64.1667	54.0417	52.9167	61.0417	57.4167	47.5833	55.3333	61.0417	83.75	51.3333	58.6667	44.2083
hsa-miR-1197	230.125	241.083	181.667	247.167	304.75	195.083	266.417	250.042	645.5	231.917	235.708	249.208
hsa-miR-1200	212.292	237.375	228.167	238.208	285.5	223.208	222.583	213.125	178.167	203.875	209.625	271.125
hsa-miR-1201	24892.9	24208.3	26558	24504.3	23826.3	24605.3	24730.9	25734.6	24084.6	25147.9	25734.6	25246.3
hsa-miR-1202	277	417.125	211.042	269.25	431.208	443.25	364.542	203.875	544.875	232.583	306.208	381.667
hsa-miR-1203	134.75	109.542	101.542	106.646	127.583	121.708	127.583	182.958	131.208	100.688	123.583	146.125
hsa-miR-1204	1258.13	1184	1660.13	1223.58	1430.08	1319.79	1192.75	1408.92	1991.92	1345.08	1386.46	1627.63
hsa-miR-1205	274.917	340.167	348.5	297	357.667	319.833	384	319.833	453.542	306.208	312	299.708
hsa-miR-1206	1110.08	942.375	1184	1036.79	761.625	1103.96	1036.79	909.917	872.583	1025.71	942.375	1126.29
hsa-miR-1207-3p	111.208	199.5	117.417	97.2917	121.708	100.083	90.4167	114.75	103.042	100.688	80.1667	73.3333
hsa-miR-1207-5p	1303.5	1265.71	1070.38	1132.88	824.208	1192.75	1265.71	966.417	1019.92	1094.04	998.167	1173.08
hsa-miR-1208	385.042	315.958	332.958	352.25	280.125	319.833	327.625	340.167	254.958	327.625	366.958	243.042
hsa-miR-122	413.333	384	427.708	490.792	354.583	542.958	370.125	300.75	431.208	325.083	399.75	325.083
hsa-miR-122*	181.292	160.375	161.875	205.208	136.083	169.083	189.75	168.333	142.542	186.417	187.208	125.167
hsa-miR-1224-3p	3503	3688.88	4133.17	3777.79	3310.46	4065.96	3869.08	2999.83	4028.33	4177.5	3688.88	3777.79
hsa-miR-1224-5p	244.917	217.833	196	211.708	195.542	219.542	138	179.792	66.0833	158.625	150.25	253.042
hsa-miR-1225-3p	1229.08	1217.33	1242.71	1145.79	1152.79	1184	1378.25	1345.08	1076.17	1178.75	1192.75	1460.42
hsa-miR-1225-5p	218.667	149.167	240.333	253.042	278.042	360.125	313.042	180.75	774.625	303.167	202.917	318.75
hsa-miR-1226	2539.25	3621	2172.21	2134.13	3445.71	3445.71	3084.63	1951.96	3718.17	2052	3718.17	3146.96
hsa-miR-1226*	900.083	755.625	937.875	531.75	648.792	942.375	864.042	1265.71	1167.71	741.125	729.5	1223.58
hsa-miR-1227	2895.88	3040.63	1951.96	2247.33	3040.63	3020.75	2824.46	1469.42	2878.21	1713	2774.42	3020.75
hsa-miR-1228	190.958	190.625	160.917	208.833	388.708	283.458	361.583	167.625	243.042	234.833	339.333	212.292
hsa-miR-1228*	7144.83	8244.25	7144.83	6521.08	7736.21	7986.71	7144.83	7049.08	6748.96	6560.21	7452.92	7280.75
hsa-miR-1229	1813.42	2977.63	1378.25	1476.83	2918.58	2618.96	2052	1234.33	3218.21	1173.08	2195.04	2306.42
hsa-miR-1231	1120.46	1173.08	1258.13	1281.25	998.167	1173.08	1533.79	1041.04	1103.96	1364.38	1097.75	1013.42
hsa-miR-1233	2389.63	2235.75	2247.33	1863.33	2211.38	2247.33	1939.38	1713	2155.63	1991.92	2155.63	2235.75
hsa-miR-1234	921.708	2389.63	722.167	636.458	2007.88	1637.75	1110.08	1312.04	1908.63	876.375	1120.46	1619.04
hsa-miR-1236	266.417	444.583	186.417	283.458	473.708	295.75	303.167	266.417	431.208	318.75	267.208	349.833
hsa-miR-1237	5285.25	6409.96	4806.33	4028.33	5928.46	5591.04	6020.25	4869.25	7219.79	4906.21	5751.04	5440.54
hsa-miR-1238	252.083	751.792	340.167	205.208	867.667	446.417	431.208	780.208	1544.5	370.125	501.667	3688.88
hsa-miR-124	77.25	102	86.7708	62.5833	67.2083	81.7917	110.917	109.833	135.417	67.2083	70.2917	119.875
hsa-miR-124*	51.1667	41.2917	44.2083	39.125	38.5	40	40.3333	36.375	35	36.375	40	37.0833
hsa-miR-1243	496.292	604	508.708	560.292	534.25	549.708	557.958	463.375	606.917	465.333	676.167	417.125
hsa-miR-1244	246.5	274	166.167	294.583	463.375	292.625	431.208	272.958	318.75	265.625	319.833	244.917
hsa-miR-1245	1031.17	1544.5	1167.71	788	1460.42	1587.54	1065.29	952.083	1660.13	956.208	1489.08	1749.21
hsa-miR-1246	22781.3	25734.6	24504.3	24084.6	26558	25734.6	23970.2	25147.9	25454.9	23696.1	25606.6	24208.3
hsa-miR-1247	815.75	1575.83	867.667	625.792	872.583	734.583	905.125	815.75	629.5	676.167	1114.25	1173.08
hsa-miR-1248	625.792	575.208	636.458	673.125	546.833	544.875	584.125	808.708	444.583	623	525.208	470.917
hsa-miR-1249	9176.88	10139	8875.5	8137.83	9279.17	10139	9130.38	7986.71	9767.33	8137.83	9682.42	9977.33
hsa-miR-124a:9.1	79.7083	81.375	65.0417	49.7083	69.375	47.5833	65.375	56.0833	51.625	67.2083	49.7083	70.625
hsa-miR-1250	176.833	195.542	171.875	190.625	223.208	183.375	220.917	157.792	176.833	165.625	192.167	182.958
hsa-miR-1251	70.2917	57.4167	71.125	75.1667	59.7917	62.5833	72.6667	72.6667	78.5	75.75	71.9583	59.5417
hsa-miR-1252	41.7917	47.9167	47.0417	42.625	51.3333	48.7917	47.0417	48.7917	55.3333	43.9583	47.5833	53.7917
hsa-miR-1253	208.333	209.625	181.667	213.875	215.167	201.5	236.667	196.75	231.917	192.833	259.125	169.083
hsa-miR-1254	3255.75	3233.54	3340.33	3340.33	2895.88	3367.17	3233.54	2977.63	2977.63	2977.63	3591.08	3040.63
hsa-miR-1255a	148.125	172.458	115.875	180.75	170.667	129.708	177.75	101.542	166.708	165.625	185.125	121.708
hsa-miR-1255b	352.25	342.875	260.833	288.292	267.208	297	272.958	272.958	348.5	240.333	301.958	257.875
hsa-miR-1256	94.9167	77.125	90.4167	94.9167	75.375	93.4792	98.5417	96.1667	74.875	100.688	104.958	84.8542
hsa-miR-1257	2134.13	1837.08	2007.88	1825.25	2052	1979.04	2155.63	1848.63	1786.58	2247.33	1691.71	1660.13
hsa-miR-1258	101.25	75.9167	66.0833	76.3333	103.563	96.7083	89.25	58.6667	205.708	125.5	110.292	74.5417
hsa-miR-1259	179.792	435.792	205.208	152.5	318.75	417.125	279.083	232.583	384	286.125	463.375	400.917
hsa-miR-125a-3p	1008.71	1126.29	1126.29	1303.5	1053.54	1724.29	1145.79	1386.46	1533.79	1137.29	1345.08	880.792
hsa-miR-125a-5p	24084.6	25606.6	25147.9	23696.1	25036.5	24892.9	24892.9	24339.8	25036.5	24208.3	24504.3	24504.3
hsa-miR-125b	25147.9	25850.5	26308.6	25734.6	25734.6	25850.5	25734.6	26033	26033	25246.3	25850.5	25606.6
hsa-miR-125b-1*	1094.04	974.917	991.875	1120.46	1159.67	1041.04	1076.17	1678.25	1065.29	1337.75	974.917	998.167
hsa-miR-125b-2*	47.0417	49.4167	48.25	54.3333	52.625	60.125	83.1042	52.625	49.4167	55.0417	58.6667	56.7083
hsa-miR-126	8406	7807.21	9176.88	8875.5	7341.29	8457.13	8406	9279.17	7807.21	11180.5	9341	8457.13
hsa-miR-126*	9767.33	6798.54	13083.2	8406	5751.04	5928.46	7986.71	13360	3777.79	16820.7	9279.17	9279.17
hsa-miR-1260	23826.3	24339.8	24892.9	23485.9	24208.3	24208.3	23485.9	24605.3	23079.7	23485.9	23696.1	25036.5
hsa-miR-1261	352.25	271.875	300.75	394.042	248.167	280.125	410.042	268.25	225.75	431.208	272.958	219.542
hsa-miR-1262	365.958	364.542	350.667	384	283.458	400.917	337.042	312	381.667	312	376.042	411.667
hsa-miR-1263	205.208	171.333	191.458	192.167	162.333	196.75	162.333	180.75	131.208	171.333	170.667	189.75
hsa-miR-1264	64.1667	57.4167	65.0417	69.25	57.4167	60.125	67.375	62.5833	60.5417	64.4167	60.125	60.125
hsa-miR-1265	40.3333	56.0833	43.2083	41.2917	43.5417	42.3333	43.9583	40.8333	43.2083	46.6667	44.2083	41.7917
hsa-miR-1266	57.9167	70.8333	55.75	51.3333	77.25	70.8333	60.7917	48.7917	78.5	49.9167	68.0417	81.7917
hsa-miR-1267	1521	1234.33	1606.58	1460.42	1251.75	1533.79	1575.83	1460.42	1489.08	1647.21	1364.38	1500.13
hsa-miR-1268	7926.92	7584.58	7088.46	7219.79	7452.92	8875.5	7624.75	6409.96	8244.25	6081.46	7624.75	9387.54
hsa-miR-1269	747.917	824.208	738.125	579.042	744.083	1203.42	571.875	473.708	974.917	534.25	629.5	952.083
hsa-miR-1270	349.833	431.208	429.375	599.625	579.042	697.042	546.833	301.958	685.542	579.042	612.792	542.958
hsa-miR-1271	1713	2026.13	1352	2007.88	2584.38	2066.54	1735.17	1627.63	3060.21	1065.29	1637.75	2155.63
hsa-miR-1272	499	470.917	556.083	465.333	398.375	465.333	516.708	501.667	378.25	501.667	468.708	480.125
hsa-miR-1273	2355.5	4565.17	1647.21	1587.54	4806.33	3310.46	4565.17	2556.54	4626.25	1678.25	3172	1564.79
hsa-miR-127-3p	317.333	556.083	542.958	364.542	726.083	455.5	307.375	1082.25	553.583	569.833	771	668.708
hsa-miR-1274a	25606.6	24605.3	25734.6	24730.9	25147.9	25606.6	25606.6	25036.5	24730.9	24605.3	25036.5	25454.9
hsa-miR-1274b	25454.9	20885.9	20720.8	25850.5	20720.8	21196.3	22460	23362.8	19961.6	20720.8	18240.9	26308.6
hsa-miR-1275	16820.7	17294.7	16473.1	15764.5	17580	17294.7	17850.5	15302.7	18492.5	14031.9	17077.8	16820.7
hsa-miR-127-5p	47.0417	81.375	45.3333	46	46	66.3333	51.3333	47.5833	49.4167	52.625	65.7917	76.3333
hsa-miR-1276	202.917	164.625	167.625	182.958	145.333	160.917	184.542	162.333	152.5	172.458	169.083	142.542
hsa-miR-1277	32.9167	33.7917	28.9167	32.0833	32.9167	32.9167	32.9167	34.4583	33.7917	30.5	32.9167	34.4583
hsa-miR-1278	145.333	85.4167	108.208	103.042	206.583	67.2083	81.375	135.417	97.8542	105.792	92.5	114.75
hsa-miR-1279	70.8333	63.4583	62.1667	69.25	62.5833	61.375	59.7917	64.6667	58.6667	63.0417	63.0417	56.7083
hsa-miR-128	6798.54	7280.75	7512.08	9000.63	7807.21	6798.54	7687.54	7926.92	7396.63	8580.13	8072.42	7512.08
hsa-miR-1280	27452.7	27134.8	27452.7	27134.8	27452.7	27452.7	27134.8	26308.6	26915.8	27134.8	26558	27452.7
hsa-miR-1281	232.583	523.208	238.667	176.833	368.292	312	337.042	238.208	268.25	215.167	280.125	243.042
hsa-miR-1282	118.875	127.583	102.583	92.2083	121.708	81	108.208	110.917	172.458	90.7083	93.8333	68.4583
hsa-miR-1283	89.5833	66.0833	88.1042	77.25	75.375	89.9167	78.875	81	76.3333	106.417	78.0417	77.4583
hsa-miR-1284	1597.33	1430.08	1670.63	1521	1178.75	1619.04	1500.13	1352	1097.75	1533.79	1564.79	1345.08
hsa-miR-1285	12191.8	10576.2	14877.2	9341	9065.38	8795.08	9279.17	15953.4	8072.42	10985.2	10301.3	10985.2
hsa-miR-1286	1587.54	1145.79	1397.21	1436.46	1097.75	1469.42	1510.67	1296.58	1132.88	1436.46	1319.79	1449.96
hsa-miR-1287	556.083	480.125	523.208	435.792	411.667	503.375	360.125	429.375	304.75	335.667	480.125	467.167
hsa-miR-1288	163.625	217.125	196	236.667	212.292	220.917	198.917	133.875	196	240.333	260.833	206.583
hsa-miR-1289	162.333	161.875	158.625	170.208	202.917	198	233.125	148.542	140.292	139.417	160.917	134.583
hsa-miR-128a:9.1	370.125	465.333	410.042	761.625	384	308.958	439.917	451.417	417.125	820.875	516.708	408.458
hsa-miR-128b:9.1	206.583	127.583	176.833	217.833	164.208	162.833	164.208	177.25	92.2083	189.75	159.917	128.958
hsa-miR-129*	175.333	190.625	167.625	138.458	255.708	203.875	210.458	164.208	238.208	170.208	180.208	169.083
hsa-miR-1290	378.25	2134.13	503.375	448.333	2440.04	808.708	368.292	1825.25	1430.08	408.458	1476.83	1076.17
hsa-miR-1291	150.917	185.792	183.917	137.167	131.208	241.083	146.125	200.042	214.333	200.75	174.833	170.667
hsa-miR-1292	271.875	169.083	295.75	142.042	193.5	195.083	200.75	235.708	338.042	225.75	312	342.875
hsa-miR-1293	361.583	307.375	306.208	415.583	337.042	390.25	344.292	295.75	612.792	364.542	334.417	378.25
hsa-miR-129-3p	385.042	394.042	275.917	314.5	290.708	213.125	299.708	399.75	217.125	249.208	243.042	455.5
hsa-miR-1294	636.458	470.917	612.792	567.25	388.708	490.792	496.292	567.25	402.583	629.5	571.875	357.667
hsa-miR-1295	423.333	632.792	446.417	363.292	307.375	441.875	374.667	465.333	285.5	293.75	388.708	459.25
hsa-miR-129-5p	8339.63	8743.33	9234.96	8339.63	8457.13	9065.38	8627.13	7861.13	8457.13	8303.67	8944.25	8303.67
hsa-miR-1296	5632.5	5632.5	4420.67	5285.25	6409.96	5973.54	6323.42	5491.71	7144.83	2584.38	3084.63	7687.54
hsa-miR-1297	438.083	330.708	361.583	475.75	298.208	337.042	423.333	332.958	228.167	396.75	349.833	232.583
hsa-miR-1298	181.292	207.542	180.208	208.833	178.167	185.125	193.5	193.5	184.542	176.167	220.167	163.625
hsa-miR-1299	544.875	448.333	448.333	455.5	406.917	425.583	446.417	461.042	265.625	431.208	525.208	306.208
hsa-miR-1300	2026.13	2120.92	1587.54	1713	2640.83	2440.04	2100.17	2824.46	2406.96	1378.25	1397.21	2026.13
hsa-miR-1301	7807.21	7624.75	8137.83	7341.29	8244.25	9176.88	8137.83	7144.83	9901.5	7926.92	8795.08	7807.21
hsa-miR-1302	71.9583	54.0417	75.75	72.6667	67.2083	49.9167	67.375	55.0417	68.7917	71.9583	46.6667	80.1667
hsa-miR-1303	508.708	398.375	391.875	485.083	494.917	387.167	652.292	540.542	632.792	774.625	451.417	584.125
hsa-miR-1304	339.333	378.25	348.5	444.583	529.75	457.5	473.708	394.042	322.25	384	411.667	448.333
hsa-miR-1305	986.375	909.917	1003.75	1013.42	855.542	934.125	921.708	841.833	738.125	947.625	824.208	851.708
hsa-miR-1307	10752.3	9538.38	9538.38	9977.33	10139	9767.33	9065.38	9341	9176.88	9000.63	9832.13	11752.5
hsa-miR-1308	22460	23826.3	22460	23231.5	24504.3	24084.6	23079.7	21715	24504.3	22202.8	23079.7	21715
hsa-miR-130a	13789.9	14216.4	15953.4	15509.2	14877.2	15302.7	13360	14877.2	15509.2	14877.2	15764.5	14723.4
hsa-miR-130a*	217.125	173.292	206.583	223.208	297	200.75	156.708	272.958	342.875	190.958	159.917	212.292
hsa-miR-130b	10853.9	11299.9	11572.6	14877.2	13596.8	11951.4	11299.9	11435.6	12463	12591.3	11675.5	11180.5
hsa-miR-130b*	14723.4	14031.9	12463	14216.4	14031.9	13360	12913.3	11084.5	13596.8	12913.3	12463	13789.9
hsa-miR-132	22202.8	21196.3	22075.7	18726.1	19961.6	19643.8	20885.9	21331	19821.5	22916.2	22592.8	22460
hsa-miR-132*	886.542	636.458	974.917	956.208	485.083	708.625	697.042	1288.67	485.083	1120.46	934.125	774.625
hsa-miR-1321	248.167	263	233.125	234.833	208.333	265.625	217.833	243.042	186.417	222.583	238.667	290
hsa-miR-1322	774.625	567.25	569.833	645.5	563.75	480.125	1137.29	664.958	658.833	905.125	661.833	592.25
hsa-miR-1323	1145.79	1192.75	1203.42	1173.08	1137.29	1303.5	1209.38	832.083	1303.5	1328.17	1137.29	1288.67
hsa-miR-1324	96.1667	195.542	85.4167	94.1042	134.583	119.5	101.25	94.1042	308.958	100.688	112.333	92.5
hsa-miR-133a	604	480.125	623	549.708	465.333	546.833	546.833	467.167	480.125	536.375	483.25	567.25
hsa-miR-133b	178.167	229	219.542	173.292	191.458	241.958	182.958	177.25	226.5	160.917	190.625	263
hsa-miR-134	2454.88	5123.92	3748.21	2424.58	5380.92	5380.92	3310.46	3279.83	6608.5	3445.71	5700.38	3992.58
hsa-miR-135a	199.5	202.208	228.167	200.75	191.458	213.125	195.542	253.042	198	208.833	208.333	246.5
hsa-miR-135a*	257.875	211.708	215.875	272.958	196.75	231	264.792	209.625	186.417	282.167	214.333	178.167
hsa-miR-135b	317.333	263	503.375	371.542	236.667	363.292	334.417	685.542	240.333	540.542	272.958	339.333
hsa-miR-135b*	536.375	516.708	492.792	623	487.042	656.208	689.25	348.5	815.75	567.25	492.792	512.958
hsa-miR-136	125.167	94.375	138.917	127.917	102	125.5	130.583	123.583	94.9167	125.5	159.917	119.875
hsa-miR-136*	77.25	72.6667	81.7917	81.7917	85.4167	90.4167	81.375	107	135.417	89.25	67.2083	81.7917
hsa-miR-137	587.917	525.208	812.125	540.542	446.417	553.583	413.333	1070.38	368.292	738.125	473.708	494.917
hsa-miR-138	11572.6	11951.4	11299.9	12463	13196.7	11820.9	12053.3	12316.2	12913.3	11299.9	11435.6	10576.2
hsa-miR-138-1*	5825.75	6081.46	5534.54	5339.13	7088.46	5884.88	4309.71	4626.25	4950.33	4734.08	4734.08	4950.33
hsa-miR-138-2*	255.708	241.083	279.083	328.708	219.542	268.25	290.708	238.667	214.333	339.333	314.5	244.917
hsa-miR-139-3p	1436.46	1863.33	1813.42	1337.75	2424.58	2235.75	1749.21	1597.33	2497.5	1786.58	3146.96	2319.33
hsa-miR-139-5p	8457.13	8303.67	9130.38	9279.17	8627.13	8522.21	8183.92	8183.92	10077.5	9387.54	9234.96	9604.67
hsa-miR-140-3p	9000.63	8875.5	8680.42	9065.38	9767.33	9341	8522.21	8944.25	10681.9	8183.92	8457.13	10077.5
hsa-miR-140-5p	692.958	681.542	711.667	711.667	645.5	540.542	581.5	974.917	538.792	971.5	673.125	801.042
hsa-miR-141	175.333	195.542	240.333	104.625	123.583	131.208	102	282.167	126.5	137.167	148.542	275.917
hsa-miR-141*	59.7917	61.0417	76.3333	63.4583	60.7917	93.4792	59.7917	59.7917	83.75	67.2083	86.4583	74.5417
hsa-miR-142-3p	71.125	64.4167	86.7708	73.3333	64.6667	72.375	69.7083	83.75	74.875	85.4167	67.5833	70.625
hsa-miR-142-5p	37.9583	39.125	41.7917	49.7083	42.3333	43.5417	67.375	46.2917	43.2083	41.2917	41.2917	51.1667
hsa-miR-143	286.958	260.167	280.875	313.042	455.5	238.667	297	298.208	417.125	352.25	326.5	315.958
hsa-miR-143*	4133.17	4133.17	4626.25	4521.96	3718.17	4481.83	4133.17	3748.21	3913.88	4309.71	4626.25	3869.08
hsa-miR-144	54.3333	65.375	60.125	61.0417	66.0833	58.6667	56.25	68.0417	58.6667	65.375	67.5833	55.0417
hsa-miR-144*	98.1667	78.5	94.375	94.1042	67.8333	88.5417	86.7708	72.6667	76.3333	87.7083	80.1667	67.375
hsa-miR-144:9.1	109.542	106.646	134.75	117.875	102	111.833	100.083	120.333	108.542	139.417	124.5	121.708
hsa-miR-145	5123.92	5591.04	6147	5534.54	5339.13	5339.13	5380.92	5440.54	4869.25	5534.54	5973.54	5928.46
hsa-miR-145*	250.042	229	252.083	241.958	204.5	208.333	227.375	254.958	150.25	245.625	199.5	166.708
hsa-miR-1468	354.583	463.375	744.083	741.125	595.458	689.25	410.042	361.583	431.208	623	759	610.333
hsa-miR-146a	4385.83	3218.21	1544.5	5825.75	3653	1476.83	4734.08	4309.71	880.792	6466.67	4565.17	1110.08
hsa-miR-146a*	250.042	244.917	215.875	294.583	228.167	228.167	297	243.042	228.167	263.792	271.125	195.083
hsa-miR-146b-3p	221.833	192.833	211.042	254.958	224.75	204.5	203.875	229.333	208.833	211.708	202.917	198
hsa-miR-146b-5p	481.292	297	625.792	470.917	402.583	341.5	423.333	516.708	508.708	726.083	540.542	557.958
hsa-miR-147	67.8333	67.375	86.7708	87.125	75.375	70.8333	94.375	77.125	117.875	79.25	68.7917	67.375
hsa-miR-147b	1053.54	1003.75	1126.29	1053.54	974.917	1013.42	909.917	916.083	864.042	1076.17	1031.17	1058.92
hsa-miR-148a	7624.75	6212.92	8795.08	7624.75	6560.21	6020.25	7807.21	10077.5	5491.71	9234.96	8339.63	6682.79
hsa-miR-148a*	115.167	159.417	156.708	164.625	104.958	149.667	105.375	164.208	110.917	221.833	103.563	106.417
hsa-miR-148b	19643.8	18492.5	16820.7	20137.7	19453.6	20885.9	19211.4	15764.5	21893.8	15764.5	16158.6	19643.8
hsa-miR-148b*	322.25	408.458	327.625	421.167	353.417	374.667	429.375	441.875	352.25	378.25	419	297
hsa-miR-149	8580.13	8072.42	9467.42	7926.92	8072.42	8406	7396.63	9901.5	7926.92	8875.5	9130.38	9176.88
hsa-miR-149*	150.917	119.5	163.625	129.708	191.458	156.167	155.542	131.208	92.2083	189.25	129.708	178.167
hsa-miR-150	1058.92	1670.63	1152.79	1184	1939.38	1553.63	1251.75	1203.42	1436.46	1047.54	1337.75	1597.33
hsa-miR-150*	395.25	425.583	400.917	496.292	481.292	396.75	516.708	468.708	501.667	508.708	417.125	463.375
hsa-miR-151:9.1	12053.3	10077.5	14031.9	9130.38	9832.13	8680.42	10301.3	17580	9065.38	14216.4	11299.9	10139
hsa-miR-151-3p	14358.9	12316.2	15509.2	10576.2	11572.6	11180.5	12463	20720.8	11435.6	16473.1	14216.4	12191.8
hsa-miR-151-5p	23079.7	22916.2	23485.9	23970.2	23485.9	23970.2	23231.5	23970.2	24208.3	24504.3	23826.3	23079.7
hsa-miR-152	3146.96	3279.83	3194.67	3688.88	3591.08	3474.38	3218.21	3419.92	3194.67	4093.75	3777.79	3233.54
hsa-miR-153	5591.04	3748.21	7624.75	5187.92	3084.63	1691.71	4349.88	9467.42	726.083	8795.08	5884.88	4220.71
hsa-miR-1537	110.292	109.542	108.542	100.688	96.7083	109.542	123.583	112.833	117.875	109.125	111.208	97.2917
hsa-miR-154	277	321.042	755.625	332.958	496.292	467.167	232.583	741.125	410.042	384	926.083	480.125
hsa-miR-154*	111.208	136.292	110.917	161.292	138	87.125	92.5	144.958	101.542	146.625	138.458	95.3333
hsa-miR-155	9977.33	9130.38	9901.5	11675.5	9901.5	9977.33	10853.9	7341.29	9832.13	11951.4	10077.5	8183.92
hsa-miR-155*	121.708	78.5	136.083	187.208	155	78.2917	119.875	91.625	93.8333	122.875	75.375	111.833
hsa-miR-15a	6212.92	6560.21	6995.63	8627.13	6276.46	6212.92	6995.63	8795.08	5928.46	8339.63	7280.75	4565.17
hsa-miR-15a*	159.917	91.625	105.375	174.375	110.917	83.75	121.125	121.125	104.167	104.958	101.542	132.208
hsa-miR-15b	21036.4	21036.4	22202.8	21633.3	21036.4	22460	20465.1	21036.4	22460	21331	21893.8	21504.6
hsa-miR-15b*	13196.7	12463	12591.3	13789.9	11820.9	11084.5	10752.3	12771.5	9467.42	13196.7	12053.3	10382
hsa-miR-16	19821.5	18240.9	21196.3	22306.3	17850.5	18014.5	19643.8	22460	15953.4	21893.8	19821.5	15302.7
hsa-miR-16-1*	503.375	417.125	421.167	378.25	417.125	470.917	399.75	505.792	413.333	444.583	505.792	560.292
hsa-miR-16-2*	8303.67	8183.92	8183.92	10077.5	6995.63	6081.46	8072.42	7452.92	3503	10681.9	8137.83	5380.92
hsa-miR-17	12591.3	13789.9	12316.2	14532.8	15302.7	13789.9	15075.2	14358.9	14031.9	13596.8	15075.2	12053.3
hsa-miR-17*	3558.5	3474.38	4220.71	6935.79	5534.54	4734.08	4677.33	3653	6850.42	2824.46	2424.58	3558.5
hsa-miR-17-5p:9.1	645.5	664.958	538.792	1070.38	952.083	569.833	841.833	793.083	515.042	971.5	896.583	747.917
hsa-miR-181a	664.958	312	459.25	425.583	391.875	531.75	406.917	542.958	421.167	729.5	604	876.375
hsa-miR-181a*	1848.63	1521	1460.42	1813.42	1337.75	1419.5	1702.04	1587.54	1137.29	1606.58	1575.83	986.375
hsa-miR-181a-2*	1019.92	726.083	1008.71	1103.96	1036.79	774.625	1041.04	1110.08	1203.42	1303.5	1065.29	979.792
hsa-miR-181b	1328.17	1209.38	1678.25	1137.29	1114.25	1761.13	1097.75	1378.25	1386.46	2007.88	1786.58	1533.79
hsa-miR-181c	402.583	213.125	339.333	300.75	245.625	345.458	353.417	318.75	423.333	387.167	254.958	435.792
hsa-miR-181c*	337.042	308.958	342.875	425.583	313.042	368.292	317.333	285.5	599.625	384	350.667	415.583
hsa-miR-181d	171.333	119.5	211.042	174.375	169.792	240.333	98.5417	185.792	165.625	290.708	144.542	114.75
hsa-miR-182	17294.7	16473.1	18240.9	17294.7	16158.6	15953.4	16820.7	15075.2	14877.2	18998.6	17850.5	15509.2
hsa-miR-182*	1691.71	1159.67	1094.04	1510.67	1575.83	1258.13	934.125	1103.96	1281.25	886.542	778	1419.5
hsa-miR-1825	239.458	410.042	196	239.458	234.833	209.625	246.5	220.167	123.583	205.208	207.542	215.167
hsa-miR-1826	16473.1	18726.1	14723.4	13360	18998.6	19211.4	18492.5	12591.3	18998.6	13789.9	18492.5	17294.7
hsa-miR-1827	84.0417	89	89	90.4167	89	69.25	85.5833	82.4583	60.5417	84.375	85.4167	58.375
hsa-miR-183	14877.2	14877.2	13789.9	15302.7	15953.4	16158.6	15302.7	11572.6	16158.6	13083.2	15302.7	15075.2
hsa-miR-183*	998.167	729.5	1476.83	1192.75	828.542	1094.04	783.667	689.25	648.792	1419.5	1159.67	864.042
hsa-miR-184	36.375	35.7083	32.9167	33.7917	38.5	30.5	33.7917	30.5	43.2083	32.9167	35	28.9167
hsa-miR-185	8680.42	9832.13	8580.13	9832.13	10494	10301.3	10985.2	9000.63	10576.2	10077.5	10985.2	8406
hsa-miR-185*	648.792	536.375	410.042	610.333	544.875	538.792	778	395.25	986.375	365.958	427.708	905.125
hsa-miR-186	9387.54	9341	8627.13	9176.88	9467.42	8944.25	9538.38	10752.3	8580.13	10382	9387.54	8680.42
hsa-miR-186*	345.458	250.042	399.75	399.75	313.042	417.125	427.708	263	385.042	515.042	283.458	360.125
hsa-miR-187	229	268.25	237.375	357.667	254.042	272.958	246.5	229.333	292.625	257.875	358.833	286.125
hsa-miR-187*	358.833	327.625	538.792	334.417	310.667	435.792	332.958	560.292	378.25	439.917	427.708	368.292
hsa-miR-188-3p	211.042	204.5	200.75	229	330.708	248.167	307.375	202.208	348.5	197.375	190.625	226.5
hsa-miR-188-5p	1553.63	1489.08	1449.96	1345.08	1837.08	1627.63	2039.17	1908.63	1848.63	1735.17	1460.42	1713
hsa-miR-189:9.1	1908.63	1895.04	2539.25	1660.13	1895.04	2100.17	1449.96	2878.21	2080.83	1825.25	2080.83	2100.17
hsa-miR-18a	6323.42	4177.5	6409.96	6748.96	4481.83	3869.08	5339.13	10212.5	4521.96	8522.21	6020.25	3621
hsa-miR-18a*	19211.4	17850.5	14532.8	18492.5	18492.5	17850.5	17294.7	18240.9	19211.4	14358.9	14723.4	18014.5
hsa-miR-18b	1724.29	1364.38	2100.17	1637.75	1094.04	1114.25	1337.75	4481.83	942.375	2977.63	1533.79	1469.42
hsa-miR-18b*	487.042	525.208	455.5	419	415.583	467.167	512.958	387.167	453.542	396.75	427.708	734.583
hsa-miR-190	468.708	429.375	546.833	538.792	378.25	523.208	536.375	444.583	544.875	661.833	483.25	542.958
hsa-miR-190b	1408.92	1959.25	1097.75	1735.17	1449.96	2080.83	1813.42	774.625	2895.88	1460.42	1837.08	1281.25
hsa-miR-191	28630.5	28630.5	25850.5	29807	29807	29807	28079.2	27452.7	29807	28079.2	26033	28630.5
hsa-miR-191*	828.542	563.75	1053.54	615.542	606.917	615.542	413.333	629.5	280.125	926.083	645.5	1036.79
hsa-miR-192	2618.96	2195.04	3801.75	3060.21	2497.5	1397.21	2134.13	5534.54	1606.58	3839.71	2340.79	1328.17
hsa-miR-192*	84.8542	74.875	82.7917	84.375	79.25	67.2083	78.875	98.5417	120.583	92.2083	82.7917	140.833
hsa-miR-193a-3p	4565.17	3801.75	2026.13	5884.88	5001.21	4420.67	5440.54	3194.67	4806.33	1152.79	1303.5	4626.25
hsa-miR-193a-5p	20885.9	20318	19211.4	19961.6	20318	20318	21715	18492.5	21196.3	21036.4	20318	18492.5
hsa-miR-193b	12463	12591.3	11820.9	10853.9	11084.5	14216.4	13083.2	9538.38	14216.4	8680.42	9000.63	14216.4
hsa-miR-193b*	1192.75	1564.79	1364.38	1533.79	1786.58	2481.96	1184	485.083	1959.25	832.083	793.083	1053.54
hsa-miR-194	1939.38	2080.83	1939.38	3529.75	2854.54	1647.21	2120.92	3952.42	2195.04	2681.54	1991.92	1825.25
hsa-miR-194*	2977.63	2247.33	2754.38	2708	1959.25	2389.63	2655.71	2640.83	1979.04	2797.92	2481.96	2039.17
hsa-miR-195	2247.33	1923.88	2519.25	3653	1352	1848.63	2681.54	3060.21	1553.63	4133.17	2120.92	1234.33
hsa-miR-195*	697.042	390.25	708.625	734.583	692.958	759	571.875	744.083	256.667	587.917	438.083	307.375
hsa-miR-196a	18726.1	20720.8	20465.1	20720.8	20885.9	22306.3	20137.7	16820.7	22075.7	20318	21196.3	20885.9
hsa-miR-196a*	652.292	1094.04	485.083	676.167	1303.5	715.25	771	549.708	1114.25	645.5	783.667	1159.67
hsa-miR-196b	5075.33	5534.54	5632.5	6682.79	5591.04	5700.38	5884.88	5632.5	4906.21	7341.29	6560.21	5491.71
hsa-miR-197	26308.6	26723.5	24605.3	25147.9	26426.8	26558	26194.6	24730.9	26558	23826.3	26308.6	26723.5
hsa-miR-198	75.9167	126.125	77.25	92.2083	113.292	69.25	125.167	111.833	73.3333	102	97.8542	98.5417
hsa-miR-199a*:9.1	788	744.083	741.125	886.542	891.333	916.083	625.792	766.958	1025.71	747.917	755.625	855.542
hsa-miR-199a-3p,hsa-miR-199b-3p	103.042	104.625	78.2917	89.25	35.7083	60.125	136.292	90.7083	108.542	186.417	178.167	66.3333
hsa-miR-199a-5p	81	72.6667	96.1667	129.708	180.208	95.3333	151.542	92.5	68.7917	144.958	116.667	90.7083
hsa-miR-199b-5p	186.417	124.167	152.958	221.833	145.333	190.958	213.125	162.333	125.167	208.833	165.167	208.833
hsa-miR-19a	623	876.375	468.708	1386.46	1173.08	610.333	851.708	788	1209.38	864.042	859.25	793.083
hsa-miR-19a*	57.25	43.5417	73.6667	100.688	47.5833	57.25	83.1042	86.4583	172.458	92.7917	64.1667	42.625
hsa-miR-19b	2235.75	2729.25	2039.17	5440.54	4677.33	2052	3340.33	2539.25	3233.54	2440.04	2556.54	2340.79
hsa-miR-19b-1*	156.167	104.625	155	234.833	145.333	185.125	103.563	144.958	151.542	128.958	121.708	190.958
hsa-miR-19b-2*	413.333	292.625	326.5	400.917	321.042	332.958	361.583	357.667	234.208	370.125	408.458	243.042
hsa-miR-200a	56.0833	52.625	52.9167	51.3333	59.7917	57.25	49.9167	66.0833	76.3333	45.75	51.625	101.25
hsa-miR-200a*	86.4583	84.375	96.1667	93.4792	87.125	84.8542	89.5833	80.1667	97.8542	93.8333	74.0417	78.5
hsa-miR-200b	470.917	379.875	494.917	453.542	387.167	379.875	381.667	415.583	312	501.667	419	352.25
hsa-miR-200b*	158.375	141.375	131.667	144.542	104.958	113.292	112.333	107	70.8333	128.958	106.646	142.542
hsa-miR-200c	1670.63	1319.79	1837.08	1884.08	1489.08	1606.58	1352	1145.79	1345.08	1848.63	2389.63	1637.75
hsa-miR-200c*	352.25	337.042	365.958	299.708	373.375	391.875	286.125	399.75	306.208	365.958	361.583	453.542
hsa-miR-202	166.167	117.417	176.833	133.875	129.708	146.625	128.958	177.25	99.5417	157.792	130.208	146.125
hsa-miR-202*	184.542	150.25	167.625	166.708	159.917	167.125	159.417	168.333	135.417	164.208	188.417	152.958
hsa-miR-202*:9.1	213.875	280.875	314.5	213.875	254.042	315.958	221.833	195.542	457.5	275.917	264.792	255.708
hsa-miR-203	241.083	185.792	298.208	166.708	265.625	190.958	166.708	453.542	219.542	444.583	404.5	193.5
hsa-miR-204	1564.79	1312.04	1619.04	1258.13	1281.25	1489.08	1082.25	1251.75	971.5	1242.71	1281.25	1510.67
hsa-miR-205	286.125	277	244.917	263	270.333	224.75	198	241.958	326.5	238.208	235.708	378.25
hsa-miR-206	673.125	483.25	606.917	658.833	443.25	534.25	668.708	492.792	512.958	692.958	567.25	475.75
hsa-miR-208a	51.625	59.5417	51.1667	53.4167	54.0417	46	53.4167	52.625	73.3333	49	51.625	58.375
hsa-miR-208b	162.833	135.417	144.542	157.292	124.5	132.75	168.333	160.917	106.646	156.167	156.167	117.417
hsa-miR-20a	23362.8	22460	22781.3	23362.8	23079.7	20720.8	24208.3	24892.9	20137.7	24892.9	23970.2	19211.4
hsa-miR-20a*	820.875	475.75	1553.63	815.75	546.833	648.792	402.583	1097.75	396.75	717.125	708.625	527.583
hsa-miR-20b	1203.42	1460.42	1328.17	1895.04	1544.5	1229.08	1597.33	1735.17	1813.42	2319.33	2052	1303.5
hsa-miR-20b*	341.5	274.917	575.208	435.792	263.792	260.167	283.458	345.458	166.708	481.292	332.958	205.708
hsa-miR-21	29807	29270.8	29807	29270.8	28079.2	28630.5	29807	29807	28630.5	29807	29807	29270.8
hsa-miR-21*	5700.38	3020.75	3621	3558.5	3748.21	4626.25	4806.33	3084.63	3255.75	1469.42	1749.21	3084.63
hsa-miR-210	8183.92	7452.92	7049.08	8743.33	8183.92	9130.38	9387.54	6521.08	11084.5	7624.75	7687.54	9832.13
hsa-miR-211	75.9167	75.9167	80.1667	84.375	71.9583	104.167	75.375	74.875	74.875	97.8542	80.1667	106.417
hsa-miR-212	2120.92	2355.5	2999.83	2539.25	2319.33	2584.38	1991.92	2854.54	3084.63	3393.25	3060.21	2556.54
hsa-miR-214	505.792	381.667	448.333	534.25	467.167	569.833	417.125	411.667	410.042	531.75	623	318.75
hsa-miR-214*	292.625	260.833	223.208	360.125	180.208	204.5	310.667	209.625	208.833	290.708	185.125	147.583
hsa-miR-215	615.542	708.625	778	704.625	560.292	374.667	641.167	1319.79	205.708	759	729.5	378.25
hsa-miR-216a	492.792	421.167	490.792	360.125	301.958	394.042	373.375	399.75	480.125	421.167	275.917	478.708
hsa-miR-216b	2195.04	2454.88	2319.33	1923.88	2235.75	2729.25	2481.96	1660.13	2618.96	2285.04	2618.96	2729.25
hsa-miR-217	94.9167	94.375	67.375	79.7083	66.0833	76.3333	62.1667	64.6667	56.7083	82.4583	76.75	59.5417
hsa-miR-218	129.708	106.646	132.75	101.542	80.4167	121.708	170.208	116.208	174.833	132.208	158.375	148.542
hsa-miR-218-1*	1167.71	1053.54	1619.04	1319.79	921.708	1678.25	1544.5	900.083	1875.58	1587.54	1036.79	1848.63
hsa-miR-218-2*	88.1042	78.5	92.7917	89.25	85.4167	93.4792	76.3333	100.083	85.9583	97.8542	85.4167	109.125
hsa-miR-219-1-3p	313.042	439.917	318.75	308.958	298.208	308.958	334.417	340.167	220.917	301.958	347.042	364.542
hsa-miR-219-2-3p	136.083	113.708	127.917	125.167	108.542	127.125	147.583	132.208	99.5417	148.542	151.917	109.125
hsa-miR-219-5p	283.458	427.708	223.208	257.875	74.0417	176.167	215.167	381.667	292.625	208.833	142.042	297
hsa-miR-22	7986.71	7736.21	7861.13	8680.42	7687.54	7452.92	8303.67	9977.33	7687.54	8244.25	7584.58	7219.79
hsa-miR-22*	3020.75	2618.96	3688.88	4677.33	3060.21	2539.25	2729.25	3529.75	1670.63	3777.79	2824.46	2519.25
hsa-miR-220a	396.75	312	325.083	288.292	451.417	408.458	453.542	271.125	534.25	335.667	402.583	358.833
hsa-miR-220b	708.625	673.125	581.5	512.958	668.708	494.917	510.875	523.208	444.583	546.833	704.625	729.5
hsa-miR-220c	348.5	441.875	429.375	348.5	364.542	408.458	348.5	475.75	538.792	278.042	337.042	499
hsa-miR-221	26558	26426.8	26426.8	26558	26308.6	26308.6	26308.6	27134.8	25850.5	27452.7	28079.2	26426.8
hsa-miR-221*	7512.08	6276.46	7396.63	7687.54	4869.25	5491.71	7219.79	8072.42	3040.63	9604.67	7736.21	6020.25
hsa-miR-222	25734.6	26194.6	26194.6	25606.6	26194.6	26033	26033	26426.8	26308.6	26723.5	26194.6	26558
hsa-miR-222*	751.792	636.458	864.042	942.375	584.125	805.25	867.667	771	373.375	689.25	722.167	421.167
hsa-miR-223	717.125	540.542	766.958	606.917	525.208	575.208	632.792	606.917	567.25	668.708	656.208	658.833
hsa-miR-223*	79.7083	113.708	100.083	83.1042	173.833	124.167	80.4167	94.1042	112.833	85.4167	87.7083	109.125
hsa-miR-224	7088.46	4385.83	8303.67	7049.08	5700.38	6608.5	6560.21	5928.46	5884.88	9977.33	8580.13	8072.42
hsa-miR-23a	26033	24892.9	26033	26194.6	24730.9	24504.3	25454.9	25246.3	22916.2	26558	25246.3	25147.9
hsa-miR-23a*	8944.25	9604.67	7807.21	9901.5	10077.5	9538.38	9604.67	5339.13	8183.92	5632.5	6521.08	5534.54
hsa-miR-23b	15764.5	14532.8	17850.5	17077.8	13789.9	14723.4	14723.4	14216.4	12591.3	19211.4	15953.4	14877.2
hsa-miR-23b*	612.792	998.167	658.833	876.375	1272.71	974.917	1003.75	615.542	1242.71	1058.92	1132.88	998.167
hsa-miR-24	23970.2	23485.9	23826.3	24605.3	24339.8	22075.7	23826.3	25606.6	22781.3	24730.9	23485.9	21331
hsa-miR-24-1*	293.75	240.333	272.958	323.625	349.833	158.625	340.167	432.958	142.542	288.292	241.083	154.375
hsa-miR-24-2*	5001.21	4734.08	5491.71	5380.92	4906.21	4309.71	5534.54	7219.79	4255.13	5235.54	4220.71	3839.71
hsa-miR-25	25850.5	26033	27134.8	26723.5	25850.5	26194.6	25850.5	26558	25734.6	26915.8	26723.5	25734.6
hsa-miR-25*	8522.21	9467.42	8406	8303.67	9341	9387.54	9176.88	7088.46	10752.3	6798.54	7512.08	7926.92
hsa-miR-26a	15509.2	14358.9	17294.7	18240.9	14723.4	14358.9	15509.2	18726.1	11820.9	18014.5	16473.1	13596.8
hsa-miR-26a-1*	137.167	128.625	263.792	176.167	124.5	115.875	164.208	224.75	125.167	244.917	110.292	68.4583
hsa-miR-26a-2*	501.667	340.167	563.75	805.25	304.75	213.125	224.75	364.542	138.917	805.25	318.75	332.958
hsa-miR-26b	20465.1	17077.8	19821.5	22202.8	16820.7	18726.1	21196.3	19821.5	15075.2	23079.7	21504.6	16158.6
hsa-miR-26b*	5928.46	5235.54	6608.5	5591.04	4565.17	5235.54	3393.25	5001.21	3146.96	5591.04	4420.67	4869.25
hsa-miR-27a	25036.5	25454.9	24339.8	26033	26033	25454.9	25036.5	26723.5	26723.5	25036.5	24892.9	23826.3
hsa-miR-27a*	7452.92	7926.92	7341.29	6850.42	7512.08	7861.13	6798.54	7584.58	6935.79	6081.46	6212.92	4521.96
hsa-miR-27b	22075.7	19821.5	19961.6	22592.8	22592.8	19821.5	18240.9	22202.8	23696.1	21633.3	19453.6	18998.6
hsa-miR-27b*	1724.29	1082.25	1510.67	1837.08	1192.75	1597.33	2211.38	1691.71	1895.04	2235.75	1469.42	1217.33
hsa-miR-28-3p	6995.63	6147	7280.75	7584.58	6850.42	7341.29	7512.08	7624.75	7280.75	8457.13	8303.67	6798.54
hsa-miR-28-5p	9279.17	9000.63	10853.9	11084.5	9000.63	9604.67	9682.42	9832.13	8795.08	11675.5	11180.5	8875.5
hsa-miR-296-3p	9604.67	9901.5	10077.5	9387.54	10853.9	11752.5	9832.13	8522.21	11180.5	9538.38	10752.3	10853.9
hsa-miR-296-5p	17850.5	18014.5	16158.6	15953.4	18014.5	18240.9	17077.8	18014.5	17580	12316.2	15509.2	20137.7
hsa-miR-297	481.292	400.917	549.708	508.708	350.667	481.292	540.542	328.708	467.167	540.542	413.333	425.583
hsa-miR-298	1082.25	991.875	1173.08	841.833	841.833	1047.54	872.583	1036.79	841.833	838.125	966.417	1272.71
hsa-miR-299-3p	419	567.25	438.083	432.958	421.167	485.083	457.5	419	444.583	404.5	499	468.708
hsa-miR-299-5p	560.292	796.208	463.375	457.5	838.125	759	656.208	652.292	1003.75	391.875	487.042	645.5
hsa-miR-29a	21504.6	22075.7	23079.7	21893.8	21715	22781.3	21331	22592.8	20885.9	22306.3	22460	22306.3
hsa-miR-29a*	6850.42	4950.33	7986.71	7088.46	6147	6560.21	5187.92	7687.54	7512.08	6608.5	6608.5	6608.5
hsa-miR-29b	7584.58	7512.08	8743.33	9767.33	8406	7512.08	8457.13	9767.33	7584.58	9467.42	8680.42	6995.63
hsa-miR-29b-1*	13360	14723.4	12913.3	14358.9	14216.4	16820.7	13789.9	9234.96	14532.8	11820.9	14358.9	10752.3
hsa-miR-29b-2*	238.667	249.208	338.042	344.292	313.042	339.333	300.75	345.458	288.292	487.042	465.333	334.417
hsa-miR-29c	4349.88	3839.71	4906.21	5700.38	3869.08	3060.21	4255.13	7736.21	2729.25	6995.63	5075.33	3340.33
hsa-miR-29c*	2878.21	2052	2155.63	3748.21	2977.63	2556.54	2454.88	2681.54	3172	3172	2584.38	2878.21
hsa-miR-300	246.5	183.375	231	279.083	274	228.167	294.583	272.958	211.042	335.667	224.75	231
hsa-miR-301a	3419.92	2999.83	3558.5	3503	2797.92	3279.83	3445.71	3218.21	2955.88	3474.38	3558.5	2854.54
hsa-miR-301b	32.0833	40.3333	34.4583	36.375	35.7083	34.4583	35	32.9167	37.9583	35.7083	40	39.125
hsa-miR-302a	57.9167	74.875	68.4583	53.4167	67.2083	62.5833	69.7083	56.0833	60.5417	68.7917	53.7917	65.7917
hsa-miR-302a*	143.167	143.792	170.208	146.125	156.167	154.375	142.042	200.042	147.583	183.375	165.167	142.542
hsa-miR-302b	160.917	108.542	176.833	146.125	106.417	132.75	136.292	119.5	88.1042	119.5	160.917	106.417
hsa-miR-302b*	1152.79	1019.92	998.167	1076.17	1087.71	876.375	1058.92	1025.71	846.5	1013.42	1070.38	909.917
hsa-miR-302c	69.25	63.4583	80.1667	69.25	67.8333	75.1667	69.7083	80.1667	110.917	73.3333	87.125	64.1667
hsa-miR-302c*	363.292	345.458	350.667	390.25	333.708	394.042	399.75	330.708	402.583	361.583	371.542	327.625
hsa-miR-302d	391.875	361.583	341.5	387.167	339.333	368.292	406.917	379.875	556.083	340.167	384	338.042
hsa-miR-302d*	115.875	115.167	122.875	121.708	98.1667	121.708	109.833	112.833	172.458	157.792	118.875	106.417
hsa-miR-302e	44.2083	43.5417	44.2083	41.2917	46	39.125	46.2917	40.8333	43.2083	43.9583	42.3333	51.9167
hsa-miR-302f	28.9167	30.5	32.0833	30.5	30.5	30.5	30.5	30.5	33.7917	30.5	30.5	34.4583
hsa-miR-30a	7219.79	5884.88	6020.25	6081.46	5440.54	5632.5	7736.21	6850.42	5440.54	6748.96	6323.42	6560.21
hsa-miR-30a*	2406.96	1076.17	1875.58	2955.88	1229.08	1510.67	1875.58	2172.21	1053.54	4255.13	2285.04	1397.21
hsa-miR-30b	11435.6	11572.6	10576.2	13596.8	12191.8	10985.2	13596.8	12191.8	12191.8	13360	12191.8	10681.9
hsa-miR-30b*	374.667	301.958	283.458	400.917	218.667	306.208	304.75	286.125	387.167	400.917	297	291.667
hsa-miR-30c	20720.8	20137.7	18726.1	22460	21331	18998.6	22592.8	21633.3	20465.1	22460	19961.6	18240.9
hsa-miR-30c-1*	3777.79	5075.33	4565.17	2454.88	3952.42	4385.83	4093.75	4133.17	3748.21	2878.21	5123.92	5285.25
hsa-miR-30c-2*	231	166.167	243.042	256.667	156.167	178.167	239.458	229.333	185.125	335.667	182.292	192.833
hsa-miR-30d	26915.8	24504.3	23696.1	25246.3	24605.3	23826.3	26426.8	25454.9	23231.5	25850.5	25454.9	24605.3
hsa-miR-30d*	2497.5	2306.42	2306.42	2681.54	2134.13	2406.96	2640.83	2406.96	2235.75	2774.42	2406.96	2080.83
hsa-miR-30e	3718.17	3146.96	4028.33	3913.88	3419.92	3084.63	3591.08	5700.38	3992.58	4481.83	3621	3474.38
hsa-miR-30e*	14216.4	10853.9	13196.7	14031.9	10576.2	10494	12591.3	14031.9	10853.9	17294.7	14532.8	11675.5
hsa-miR-31	301.958	300.75	303.167	304.75	340.167	303.167	290.708	334.417	334.417	293.75	342.875	304.75
hsa-miR-31*	197.375	162.833	178.542	195.542	164.208	164.208	182.292	172.458	155	195.542	176.833	166.708
hsa-miR-32	201.5	170.208	212.292	290.708	152.5	156.167	177.75	240.333	110.917	350.667	223.208	144.958
hsa-miR-32*	755.625	592.25	478.708	1670.63	515.042	483.25	1419.5	636.458	292.625	1749.21	1019.92	390.25
hsa-miR-320d,hsa-miR-320b,hsa-miR-320a,hsa-miR-320c	26194.6	26915.8	26723.5	26308.6	26915.8	26723.5	26723.5	25850.5	27452.7	25734.6	27134.8	26194.6
hsa-miR-323-3p	459.25	796.208	656.208	510.875	774.625	766.958	439.917	867.667	755.625	618.75	648.792	689.25
hsa-miR-323-5p	132.208	205.708	199.5	155.542	131.208	228.167	180.208	155.542	164.625	152.958	263	163.625
hsa-miR-324-3p	15953.4	15509.2	15302.7	15075.2	15075.2	15075.2	14877.2	15509.2	15764.5	15075.2	14877.2	17077.8
hsa-miR-324-5p	9682.42	13083.2	10681.9	8580.13	12053.3	12913.3	12191.8	9065.38	17850.5	9279.17	11084.5	13360
hsa-miR-325	306.208	292.625	290	312	264.792	298.208	277	278.042	246.5	261.792	326.5	238.208
hsa-miR-326	5187.92	4626.25	3255.75	4481.83	4133.17	5075.33	5001.21	3839.71	5235.54	2854.54	3445.71	6212.92
hsa-miR-328	7687.54	8522.21	6935.79	6466.67	8795.08	8303.67	7452.92	6560.21	7452.92	7219.79	8522.21	9341
hsa-miR-329	2955.88	4869.25	2340.79	1848.63	4734.08	2454.88	2235.75	3777.79	2440.04	2895.88	4177.5	3194.67
hsa-miR-330-3p	2211.38	2406.96	2120.92	2774.42	2918.58	2319.33	2195.04	2584.38	3020.75	2355.5	2519.25	2681.54
hsa-miR-330-5p	527.583	453.542	365.958	648.792	516.708	286.125	599.625	778	402.583	419	394.042	761.625
hsa-miR-331-3p	12316.2	12771.5	10752.3	12913.3	13083.2	12316.2	14358.9	10576.2	14723.4	9065.38	10681.9	15953.4
hsa-miR-331-5p	444.583	446.417	612.792	556.083	439.917	478.708	553.583	470.917	490.792	520.375	531.75	396.75
hsa-miR-335	1510.67	1991.92	1281.25	2389.63	2080.83	1895.04	1848.63	1575.83	1801.04	2918.58	1660.13	1288.67
hsa-miR-335*	1575.83	1296.58	1801.04	2080.83	1702.04	864.042	1979.04	1979.04	1192.75	3913.88	2100.17	1352
hsa-miR-337:9.1	64.1667	67.375	55.75	70.625	98.1667	96.7083	54.0417	88.1042	200.042	82.4583	100.083	78.5
hsa-miR-337-3p	876.375	1386.46	1137.29	1564.79	1775.38	956.208	744.083	2007.88	1691.71	1979.04	2007.88	1167.71
hsa-miR-337-5p	88.1042	83.75	86.7708	99.5417	94.9167	78.2917	78.875	108.208	80.1667	78.0417	78.0417	73.3333
hsa-miR-338-3p	136.083	121.125	146.125	146.125	111.833	115.875	119.875	130.208	106.646	144.958	133.25	119.875
hsa-miR-338-5p	141.375	132.75	147.167	132.208	167.625	144.958	144.542	138	142.542	137.167	144.542	135.417
hsa-miR-339-3p	1003.75	886.542	859.25	1025.71	1203.42	824.208	1234.33	1449.96	1114.25	766.958	726.083	1070.38
hsa-miR-339-5p	13596.8	13360	11180.5	12053.3	14358.9	14031.9	14031.9	11180.5	15302.7	5884.88	9467.42	15764.5
hsa-miR-33a	279.083	363.292	174.375	986.375	1019.92	181.667	331.542	284.333	615.542	165.625	220.167	354.583
hsa-miR-33a*	485.083	459.25	435.792	443.25	406.917	413.333	370.125	408.458	263.792	394.042	525.208	257.875
hsa-miR-33b	74.875	160.375	114.75	325.083	208.333	101.25	75.375	85.4167	187.75	103.563	94.9167	176.833
hsa-miR-33b*	115.875	97.2917	213.875	177.25	114.75	142.042	112.333	147.167	152.5	112.833	94.9167	200.75
hsa-miR-340	855.542	556.083	641.167	1288.67	661.833	563.75	838.125	1159.67	625.792	1660.13	900.083	396.75
hsa-miR-340*	1951.96	1272.71	2211.38	1991.92	1184	1328.17	1281.25	2481.96	886.542	3194.67	1627.63	1606.58
hsa-miR-342-3p	12771.5	11752.5	10985.2	10382	10752.3	12191.8	12316.2	10301.3	11572.6	8944.25	9538.38	12913.3
hsa-miR-342-5p	3060.21	3653	2895.88	3367.17	3503	3718.17	3688.88	2285.04	5001.21	2754.38	2878.21	2955.88
hsa-miR-345	304.75	187.75	275.917	227.375	200.75	244.917	230.125	332.958	354.583	297	247.167	429.375
hsa-miR-345:9.1	1863.33	1553.63	1386.46	1749.21	1575.83	1296.58	1837.08	2247.33	1749.21	1801.04	1702.04	1801.04
hsa-miR-346	330.708	501.667	334.417	353.417	399.75	385.042	358.833	410.042	345.458	310.667	459.25	496.292
hsa-miR-34a	2640.83	1223.58	2375.88	3218.21	1813.42	2211.38	2267.38	2389.63	2640.83	4420.67	2977.63	3255.75
hsa-miR-34a*	139.417	81.375	112.333	138.458	84.0417	95.3333	126.125	88.1042	85.9583	128.958	120.583	144.958
hsa-miR-34b	715.25	960.708	563.75	937.875	529.75	567.25	761.625	425.583	223.208	788	867.667	587.917
hsa-miR-34b*	581.5	618.75	516.708	685.542	747.917	501.667	473.708	708.625	956.208	664.958	599.625	490.792
hsa-miR-34c-3p	432.958	510.875	444.583	501.667	569.833	232.583	355.792	729.5	342.875	427.708	330.708	512.958
hsa-miR-34c-5p	974.917	610.333	717.125	1065.29	986.375	796.208	648.792	1173.08	487.042	986.375	741.125	956.208
hsa-miR-361-3p	3992.58	3310.46	3591.08	3839.71	3839.71	3653	3839.71	4220.71	4309.71	4626.25	3529.75	3913.88
hsa-miR-361-5p	6935.79	6850.42	7584.58	7807.21	7219.79	7219.79	7861.13	8339.63	7341.29	9341	8743.33	6850.42
hsa-miR-362-3p	2424.58	1884.08	3040.63	2440.04	1637.75	1670.63	2007.88	2424.58	1647.21	3503	2134.13	2708
hsa-miR-362-5p	5884.88	6521.08	5884.88	6608.5	6466.67	7088.46	6850.42	5751.04	7861.13	7736.21	7926.92	6935.79
hsa-miR-363	1775.38	1242.71	1533.79	3040.63	1647.21	1312.04	2066.54	1801.04	1223.58	2375.88	1775.38	1713
hsa-miR-363*	79.7083	75.9167	67.375	133.875	127.583	95.3333	91.1042	52.625	60.5417	100.688	90.7083	117.417
hsa-miR-365	9130.38	6935.79	6560.21	12316.2	7986.71	7144.83	8795.08	7512.08	9538.38	10576.2	7341.29	12591.3
hsa-miR-367	105.792	126.125	127.917	138.458	109.125	142.042	132.208	98.5417	152.5	127.583	124.5	127.125
hsa-miR-367*	971.5	796.208	942.375	956.208	734.583	793.083	886.542	824.208	685.542	916.083	812.125	701.042
hsa-miR-369-3p	121.708	180.75	208.833	284.333	171.875	169.083	168.333	186.417	408.458	423.333	269.25	93.8333
hsa-miR-369-5p	1114.25	778	1036.79	1152.79	761.625	905.125	1178.75	979.792	801.042	1272.71	891.333	808.708
hsa-miR-370	1242.71	1939.38	1430.08	1110.08	1670.63	1288.67	896.583	2080.83	1159.67	1281.25	1724.29	2172.21
hsa-miR-371-3p	143.167	91.625	174.375	123.583	84.0417	107	114.167	144.958	70.8333	203.875	130.208	157.792
hsa-miR-371-5p	1786.58	1979.04	1761.13	1908.63	1863.33	1837.08	1825.25	1500.13	1627.63	1702.04	1848.63	1489.08
hsa-miR-372	1476.83	1345.08	1419.5	1378.25	1242.71	1449.96	1337.75	1192.75	1364.38	1203.42	1288.67	1436.46
hsa-miR-373	60.7917	43.5417	60.125	56.0833	40.8333	73.3333	42.625	46.2917	37.9583	61.0417	37.0833	45.3333
hsa-miR-373*	43.2083	45.75	49	44.625	49.4167	77.25	43.9583	43.2083	46	47.5833	44.2083	49.7083
hsa-miR-374a	13083.2	9176.88	15075.2	14723.4	7584.58	7624.75	10576.2	17294.7	5187.92	19821.5	11951.4	8580.13
hsa-miR-374a*	1265.71	815.75	1159.67	1319.79	722.167	998.167	1265.71	1058.92	783.667	1670.63	876.375	942.375
hsa-miR-374b	88.1042	234.208	148.542	260.833	140.833	69.25	124.167	160.917	37.9583	349.833	127.583	113.292
hsa-miR-374b*	189.75	141.375	218.667	225.75	145.333	131.208	181.292	192.833	162.833	269.25	165.167	128.958
hsa-miR-375	1469.42	1691.71	1786.58	2406.96	1627.63	2340.79	2406.96	796.208	2681.54	2172.21	2729.25	1939.38
hsa-miR-376a	365.958	423.333	360.125	451.417	538.792	328.708	310.667	388.708	496.292	448.333	379.875	408.458
hsa-miR-376a*	79.7083	68.7917	73.6667	47.0417	116.208	58.6667	45.3333	152.958	46	116.208	49.7083	46.6667
hsa-miR-376a*:9.1	124.167	162.833	166.167	192.167	136.083	125.5	146.125	205.708	238.208	190.958	165.167	117.417
hsa-miR-376b	846.5	812.125	891.333	891.333	751.792	900.083	796.208	986.375	1041.04	880.792	991.875	805.25
hsa-miR-376c	201.5	485.083	263	292.625	553.583	354.583	282.167	439.917	394.042	322.25	306.208	429.375
hsa-miR-377	1097.75	1058.92	1047.54	1094.04	864.042	886.542	974.917	956.208	812.125	979.792	1053.54	896.583
hsa-miR-377*	266.417	279.083	330.708	217.833	249.208	241.958	215.167	286.125	195.083	272.958	293.75	330.708
hsa-miR-378	16158.6	15764.5	17580	16158.6	16473.1	16473.1	16473.1	19453.6	18240.9	15509.2	16820.7	17850.5
hsa-miR-378*	4869.25	3558.5	4065.96	4906.21	4093.75	4950.33	5825.75	4906.21	4220.71	4565.17	4093.75	5700.38
hsa-miR-379	734.583	1137.29	1521	808.708	934.125	896.583	604	1476.83	529.75	1510.67	1678.25	1041.04
hsa-miR-379*	101.25	113.708	203.375	307.375	106.417	148.125	112.333	196.75	156.167	272.958	214.333	93.8333
hsa-miR-380	381.667	323.625	347.042	527.583	457.5	496.292	419	373.375	473.708	444.583	510.875	344.292
hsa-miR-380*	180.208	144.958	237.375	206.583	189.25	238.208	236.667	127.917	176.833	227.375	114.75	195.083
hsa-miR-381	1041.04	966.417	1272.71	998.167	960.708	986.375	900.083	1251.75	1126.29	1103.96	1137.29	1258.13
hsa-miR-382	859.25	1533.79	1345.08	796.208	2285.04	1991.92	952.083	1364.38	2247.33	1296.58	2375.88	1521
hsa-miR-383	81.7917	87.125	94.9167	85.5833	80.4167	88.5417	84.8542	86.4583	97.8542	85.4167	81.375	84.8542
hsa-miR-384	206.583	166.167	170.208	193.5	173.833	178.167	164.208	183.917	96.1667	164.208	196	103.563
hsa-miR-409-3p	2100.17	3109.54	3503	1312.04	3279.83	2375.88	1627.63	4385.83	2708	3419.92	4521.96	3060.21
hsa-miR-409-5p	224.75	233.125	499	169.083	158.375	290	217.125	556.083	213.125	468.708	263	312
hsa-miR-410	221.833	398.375	140.833	193.5	337.042	315.958	241.083	219.542	334.417	74.5417	173.292	487.042
hsa-miR-411	319.833	391.875	880.792	250.667	373.375	136.083	170.208	2066.54	453.542	615.542	398.375	441.875
hsa-miR-411*	132.208	161.875	163.625	195.542	195.083	181.667	148.542	185.125	205.708	205.708	241.083	169.083
hsa-miR-412	542.958	612.792	778	549.708	492.792	599.625	525.208	527.583	556.083	527.583	490.792	783.667
hsa-miR-421	11820.9	11084.5	14216.4	10985.2	10382	11299.9	11084.5	13196.7	9000.63	14532.8	13596.8	11820.9
hsa-miR-422a	45.75	46.6667	37.9583	52.375	51.3333	46	47.5833	61.0417	76.3333	42.3333	37.9583	46.6667
hsa-miR-423-3p	20137.7	21633.3	21893.8	19821.5	21196.3	21893.8	19961.6	21196.3	21715	20137.7	21331	21633.3
hsa-miR-423-5p	14532.8	15302.7	12053.3	11820.9	14532.8	13596.8	14216.4	10985.2	13083.2	11084.5	12913.3	14358.9
hsa-miR-424	9341	9387.54	11435.6	10752.3	9387.54	8743.33	9341	13789.9	8137.83	11572.6	10382	7861.13
hsa-miR-424*	5751.04	4906.21	4177.5	5235.54	4309.71	6850.42	6466.67	3340.33	5973.54	4869.25	4133.17	4420.67
hsa-miR-425	15075.2	12053.3	18014.5	13196.7	11752.5	12053.3	13196.7	20885.9	12053.3	19453.6	13083.2	14031.9
hsa-miR-425*	3529.75	2375.88	4677.33	4309.71	2878.21	3255.75	1724.29	4255.13	2774.42	3992.58	3367.17	3591.08
hsa-miR-429	89.5833	82.7917	92.7917	92.2083	79.25	81.7917	77.25	100.083	88.1042	96.1667	90.7083	90.7083
hsa-miR-431	529.75	413.333	523.208	632.792	986.375	399.75	481.292	1041.04	475.75	544.875	556.083	738.125
hsa-miR-431*	137.167	92.7917	120.583	104.167	89	124.167	108.208	160.917	85.9583	118.333	140.833	111.833
hsa-miR-432	1637.75	5001.21	2824.46	2655.71	5973.54	5187.92	2895.88	1749.21	7624.75	1691.71	4255.13	3367.17
hsa-miR-432*	129.708	174.833	125.167	132.208	217.833	195.083	222.583	125.5	323.625	139.417	185.125	202.917
hsa-miR-433	515.042	1132.88	673.125	534.25	1145.79	1178.75	701.042	599.625	1436.46	592.25	1229.08	1087.71
hsa-miR-448	73.6667	87.125	77.25	70.625	70.8333	117.875	72.6667	78.875	94.9167	75.75	97.8542	90.7083
hsa-miR-449a	4028.33	4349.88	3718.17	2172.21	3621	5440.54	4385.83	2306.42	6560.21	1637.75	1419.5	5235.54
hsa-miR-449b	2080.83	1702.04	1979.04	2066.54	1660.13	2134.13	2026.13	1553.63	1884.08	1959.25	1813.42	1647.21
hsa-miR-450a	2319.33	1786.58	2195.04	2519.25	1801.04	1813.42	2389.63	3393.25	2134.13	2424.58	2066.54	1678.25
hsa-miR-450b-3p	113.292	94.375	112.333	107.646	107.646	115.875	95.3333	103.042	108.542	80.4167	75.375	213.875
hsa-miR-450b-5p	937.875	766.958	832.083	1430.08	681.542	560.292	820.875	998.167	788	1837.08	880.792	744.083
hsa-miR-451	261.792	244.917	241.958	238.208	209.625	256.667	238.208	253.042	170.667	218.667	254.958	203.875
hsa-miR-452	1047.54	1408.92	808.708	697.042	974.917	828.542	1419.5	708.625	979.792	744.083	1110.08	1242.71
hsa-miR-452*	701.042	656.208	747.917	766.958	801.042	755.625	632.792	761.625	1031.17	755.625	697.042	788
hsa-miR-452*:9.1	3621	5825.75	3367.17	2918.58	6081.46	5123.92	5491.71	2774.42	7736.21	3952.42	5235.54	5632.5
hsa-miR-453	332.958	286.125	293.75	280.875	231.917	344.292	318.75	266.417	176.833	327.625	248.167	226.5
hsa-miR-454	3393.25	2854.54	3474.38	4420.67	2539.25	1951.96	3503	3992.58	1735.17	5973.54	3653	2007.88
hsa-miR-454*	6521.08	5491.71	6682.79	7144.83	3748.21	3558.5	6081.46	5235.54	1469.42	7452.92	5928.46	4734.08
hsa-miR-455-3p	23696.1	23079.7	24084.6	22916.2	22306.3	23231.5	21893.8	24084.6	22202.8	23970.2	24084.6	23696.1
hsa-miR-455-5p	3279.83	2774.42	2878.21	3194.67	3233.54	2172.21	2977.63	4177.5	2918.58	3529.75	3233.54	2406.96
hsa-miR-483-3p	1076.17	1178.75	815.75	820.875	1386.46	960.708	991.875	880.792	1397.21	704.625	851.708	937.875
hsa-miR-483-5p	327.625	334.417	406.917	291.667	252.083	333.708	243.792	406.917	220.167	352.25	347.042	327.625
hsa-miR-484	21715	22202.8	22306.3	20885.9	22075.7	22916.2	21036.4	22306.3	23826.3	20465.1	21633.3	22075.7
hsa-miR-485-3p	738.125	1013.42	851.708	575.208	1378.25	1126.29	641.167	1031.17	896.583	771	1019.92	1137.29
hsa-miR-485-5p	595.458	496.292	715.25	595.458	503.375	592.25	563.75	567.25	587.917	648.792	615.542	641.167
hsa-miR-486-3p	253.042	166.167	203.375	215.167	190.625	256.667	390.25	213.125	360.125	194.208	205.208	158.375
hsa-miR-486-5p	5440.54	6748.96	5440.54	6212.92	7049.08	6995.63	6608.5	3718.17	7049.08	5187.92	5825.75	6323.42
hsa-miR-487a	123.583	105.375	130.208	173.292	124.5	119.5	176.833	179.125	195.083	154.375	128.625	150.25
hsa-miR-487b	595.458	926.083	820.875	851.708	1167.71	729.5	579.042	1328.17	926.083	966.417	1203.42	1047.54
hsa-miR-488	186.417	97.2917	137.167	159.917	94.9167	117.875	158.375	132.208	73.3333	243.042	108.542	93.8333
hsa-miR-488*	285.5	286.125	280.875	279.083	279.083	280.125	274	246.5	332.958	248.167	303.167	240.333
hsa-miR-489	43.2083	32.9167	36.375	33.7917	32.9167	37.0833	33.7917	37.9583	33.7917	37.0833	47.5833	34.4583
hsa-miR-490-3p	232.583	239.458	225.75	260.833	244.917	253.042	259.125	222.583	250.042	232.583	295.75	185.125
hsa-miR-490-5p	155.542	121.708	354.583	149.167	92.7917	93.4792	58.375	2026.13	104.167	238.208	169.083	271.125
hsa-miR-491-3p	966.417	761.625	886.542	1076.17	661.833	832.083	916.083	738.125	652.292	1008.71	711.667	629.5
hsa-miR-491-5p	3869.08	3503	3869.08	4177.5	4420.67	4565.17	3621	4521.96	5075.33	3801.75	4869.25	4385.83
hsa-miR-492	71.9583	87.125	63.75	67.8333	87.125	60.125	81.375	69.7083	99.5417	67.2083	62.1667	69.375
hsa-miR-493	399.75	304.75	457.5	357.667	629.5	413.333	423.333	722.167	824.208	473.708	575.208	435.792
hsa-miR-493*	3310.46	2172.21	5001.21	2026.13	1713	1786.58	1895.04	3591.08	1489.08	4065.96	3218.21	3529.75
hsa-miR-494	341.5	435.792	483.25	441.875	443.25	413.333	485.083	645.5	371.542	431.208	525.208	503.375
hsa-miR-495	398.375	303.167	332.958	563.75	363.292	408.458	453.542	481.292	330.708	556.083	446.417	321.042
hsa-miR-496	57.9167	46.6667	69.375	67.8333	82.0417	62.5833	85.9583	77.125	52.625	63.0417	76.3333	51.9167
hsa-miR-497	408.458	492.792	370.125	544.875	461.042	485.083	365.958	352.25	253.042	357.667	427.708	399.75
hsa-miR-497*	28.9167	28.9167	28.9167	28.9167	28.9167	28.9167	28.9167	28.9167	30.5	28.9167	28.9167	32.9167
hsa-miR-498	156.708	150.25	174.375	170.208	138.917	146.625	178.542	146.625	112.833	165.625	118.875	187.208
hsa-miR-499-3p	109.542	89.5833	98.1667	106.646	89	98.1667	118.333	96.1667	81	110.292	108.542	84.8542
hsa-miR-499-5p	4806.33	4481.83	5235.54	5001.21	4385.83	4806.33	4906.21	4420.67	4420.67	5285.25	5440.54	4028.33
hsa-miR-500	11951.4	12191.8	11951.4	11572.6	12771.5	12591.3	11572.6	12913.3	12771.5	12053.3	13196.7	12463
hsa-miR-501-3p	8627.13	8680.42	7926.92	8183.92	8522.21	8137.83	8580.13	8137.83	9604.67	7584.58	7049.08	9065.38
hsa-miR-501-5p	9832.13	9767.33	8457.13	8072.42	9130.38	9901.5	9977.33	9176.88	10212.5	10212.5	9977.33	9467.42
hsa-miR-502-3p,hsa-miR-500*	9901.5	10301.3	8244.25	10139	12316.2	10212.5	10139	8875.5	14358.9	7144.83	6935.79	13083.2
hsa-miR-502-5p	676.167	741.125	788	880.792	900.083	841.833	738.125	864.042	1521	851.708	761.625	1132.88
hsa-miR-503	11084.5	10382	9065.38	12191.8	11675.5	11572.6	10212.5	8457.13	12316.2	7807.21	7861.13	11435.6
hsa-miR-504	107	129.708	126.125	109.542	106.417	111.833	121.125	147.167	234.833	119.5	131.667	197.375
hsa-miR-505	4734.08	3172	3992.58	3419.92	3194.67	4349.88	3529.75	3621	4385.83	3621	3040.63	4677.33
hsa-miR-505*	394.042	490.792	385.042	755.625	832.083	846.5	711.667	292.625	1288.67	612.792	587.917	538.792
hsa-miR-506	113.292	97.2917	142.542	119.875	92.7917	125.5	117.417	105.792	112.833	136.083	121.708	121.708
hsa-miR-507	960.708	771	979.792	921.708	685.542	864.042	876.375	780.208	741.125	909.917	815.75	726.083
hsa-miR-508-3p	53.4167	49.4167	62.1667	56.0833	56.25	51.3333	51.9167	56.0833	64.1667	64.4167	55.0417	59.5417
hsa-miR-508-5p	103.042	89	115.875	103.042	87.125	98.1667	97.8542	94.1042	92.2083	104.958	97.8542	111.833
hsa-miR-509-3-5p	62.1667	77.125	51.1667	49.7083	49.4167	72.375	48.7917	57.25	49.4167	64.4167	51.625	118.875
hsa-miR-509-3p	59.0833	61.0417	80.1667	88.1042	57.4167	81.375	108.208	59.7917	101.542	57.25	60.125	86.7708
hsa-miR-509-5p	127.125	106.646	150.25	112.833	180.208	108.208	208.833	75.75	183.375	116.208	87.7083	172.458
hsa-miR-510	95.7917	113.708	107	107.646	127.583	106.417	100.083	88.1042	128.625	94.9167	116.667	89
hsa-miR-511	195.083	271.875	255.708	190.625	345.458	206.583	116.208	121.708	181.667	286.125	238.667	83.1042
hsa-miR-512-3p	337.042	247.167	300.75	350.667	228.167	271.875	353.417	307.375	170.208	373.375	286.958	234.208
hsa-miR-512-5p	75.9167	68.7917	61.0417	63.4583	61.7917	66.3333	65.375	66.7917	65.0417	77.125	65.7917	80.1667
hsa-miR-513:9.1	35	51.625	40.3333	40.3333	55.0417	40.8333	36.375	43.2083	113.708	37.9583	42.3333	55.0417
hsa-miR-513a-3p	66.0833	65.375	71.125	66.3333	66.0833	70.8333	62.1667	64.6667	80.1667	57.25	58.6667	72.375
hsa-miR-513a-5p	1627.63	1627.63	1775.38	1500.13	1364.38	1749.21	1691.71	1430.08	1863.33	1597.33	1500.13	1575.83
hsa-miR-513b	1923.88	2155.63	1229.08	1761.13	3146.96	2754.38	3060.21	1137.29	5632.5	1217.33	1647.21	1670.63
hsa-miR-513c	107	98.5417	94.9167	112.833	94.9167	82.7917	97.8542	100.083	78.5	97.8542	110.292	76.3333
hsa-miR-514	48.7917	37.0833	40.3333	37.9583	38.5	48.7917	38.5	40	37.9583	41.2917	35	39.125
hsa-miR-515-3p	127.125	159.417	170.208	138.458	187.208	195.083	134.583	189.25	250.042	152.958	176.833	220.917
hsa-miR-515-5p	47.0417	46.6667	48.25	43.9583	49.4167	47.5833	47.9167	46.2917	49.4167	45.75	48.7917	56.7083
hsa-miR-516a-3p,hsa-miR-516b*	896.583	734.583	942.375	872.583	676.167	751.792	766.958	838.125	618.75	859.25	747.917	685.542
hsa-miR-516a-5p	1036.79	1047.54	1192.75	1047.54	1008.71	1132.88	1047.54	851.708	1103.96	1110.08	1008.71	1192.75
hsa-miR-516b	70.2917	68.7917	66.0833	64.4167	56.25	53.7917	56.0833	66.7917	52.625	69.375	68.7917	86.7708
hsa-miR-517*	213.125	223.208	208.833	189.25	212.292	217.125	189.75	205.708	169.083	150.25	192.833	205.208
hsa-miR-517a	5973.54	7088.46	6521.08	6323.42	6798.54	6748.96	6276.46	5973.54	5751.04	6020.25	6850.42	6748.96
hsa-miR-517a,hsa-miR-517b	255.708	214.333	227.375	271.125	204.5	205.708	250.667	257.875	268.25	292.625	252.083	181.292
hsa-miR-517c	4677.33	6466.67	5123.92	4385.83	6935.79	6409.96	5751.04	4806.33	7986.71	4677.33	6147	6081.46
hsa-miR-518a-3p	8743.33	9065.38	9977.33	8795.08	9234.96	9279.17	8944.25	8406	9065.38	9176.88	9604.67	9234.96
hsa-miR-518a-5p,hsa-miR-527	166.167	117.417	137.167	153.792	111.833	127.125	138	130.208	78.5	132.208	144.542	76.3333
hsa-miR-518b	260.167	283.458	231	180.75	175.333	190.958	166.708	215.875	181.667	198.917	274.917	199.5
hsa-miR-518c	150.917	90.7083	150.25	110.917	94.9167	104.167	100.083	125.5	85.9583	181.292	116.667	110.292
hsa-miR-518c*	808.708	701.042	788	734.583	563.75	766.958	751.792	697.042	656.208	812.125	774.625	755.625
hsa-miR-518d-3p	1087.71	1008.71	1103.96	1058.92	846.5	1137.29	1152.79	947.625	1013.42	1082.25	1087.71	1076.17
hsa-miR-518e	129.708	155	127.917	155.542	156.167	152.5	140.292	123.583	130.208	168.333	168.333	142.542
hsa-miR-518e*,hsa-miR-519a*,hsa-miR-519b-5p,hsa-miR-519c-5p,hsa-miR-522*,hsa-miR-523*	182.958	195.542	157.792	230.125	173.833	253.042	219.542	174.375	248.167	198.917	165.167	174.375
hsa-miR-518e:9.1	824.208	656.208	828.542	859.25	592.25	661.833	808.708	623	503.375	846.5	606.917	615.542
hsa-miR-518f	119.5	108.542	58.6667	88.1042	148.125	62.5833	57.4167	78.875	228.167	61.0417	84.0417	89
hsa-miR-518f*,hsa-miR-518d-5p,hsa-miR-520c-5p,hsa-miR-526a	104.958	98.5417	106.646	109.542	102	97.8542	108.208	93.4792	100.688	107.646	95.7917	107.646
hsa-miR-518f:9.1	49.9167	45.75	47.0417	51.3333	52.625	45.3333	49.9167	66.0833	49.4167	43.9583	46	48.25
hsa-miR-519a	52.625	52.625	49.7083	57.25	55.75	46	49.9167	54.0417	53.7917	47.9167	51.625	46.6667
hsa-miR-519b-3p	3109.54	2955.88	3060.21	3255.75	2655.71	3146.96	3172	2497.5	2797.92	2640.83	3255.75	2375.88
hsa-miR-519c-3p	187.75	169.083	198	200.75	173.833	190.958	159.917	215.875	196	187.75	196	185.125
hsa-miR-519d	70.2917	59.5417	80.1667	74.0417	76.3333	73.3333	86.7708	80.1667	64.1667	71.9583	78.0417	51.9167
hsa-miR-519e	314.5	290	395.25	340.167	257.875	298.208	280.875	352.25	244.917	354.583	317.333	332.958
hsa-miR-519e*	260.167	198	278.042	183.375	178.167	171.333	208.833	263	156.167	283.458	203.875	223.208
hsa-miR-520a-3p	345.458	387.167	363.292	379.875	427.708	404.5	388.708	374.667	390.25	363.292	448.333	402.583
hsa-miR-520a-5p	120.333	92.5	117.875	136.083	92.7917	91.1042	114.167	116.208	83.75	144.542	108.542	84.8542
hsa-miR-520b,hsa-miR-520c-3p,hsa-miR-520f	104.625	117.417	119.5	106.646	103.563	110.917	101.25	105.792	115.875	114.167	127.583	159.417
hsa-miR-520c-3p,hsa-miR-520f	125.167	131.667	134.75	120.583	204.5	120.333	159.917	125.5	185.125	136.083	135.417	132.208
hsa-miR-520d:9.1	89.5833	77.125	84.0417	84.375	118.333	82.4583	80.4167	86.4583	88.1042	87.125	81.375	75.1667
hsa-miR-520d-3p	102	72.6667	84.8542	75.1667	77.25	76.3333	92.5	89.25	93.8333	70.625	83.75	89
hsa-miR-520d-5p	214.333	164.625	192.833	223.208	243.042	225.75	202.208	164.208	374.667	173.292	158.375	212.292
hsa-miR-520e	38.5	52.625	57.4167	57.9167	121.708	48.7917	70.8333	44.2083	179.792	52.625	56.25	86.7708
hsa-miR-520f	51.1667	48.7917	51.1667	49.7083	49.4167	51.3333	51.3333	46.2917	65.0417	52.625	48.7917	46.6667
hsa-miR-520g	98.9583	146.625	90.4167	47.9167	69.375	95.3333	100.083	104.625	126.5	89.25	97.8542	132.208
hsa-miR-520h,hsa-miR-520g	62.1667	78.5	73.6667	59.5417	63.0417	66.3333	60.7917	63.4583	62.5833	59.5417	70.2917	117.417
hsa-miR-521	86.4583	85.4167	105.375	63.4583	73.125	144.542	93.4792	74.0417	208.833	83.75	101.542	92.5
hsa-miR-522	263	195.542	290	231.917	212.292	232.583	269.25	203.875	290.708	315.958	304.75	249.208
hsa-miR-523	204.5	181.667	177.75	260.167	187.75	178.167	196.75	207.542	159.917	184.542	182.292	171.875
hsa-miR-524-3p	141.375	124.167	127.917	118.875	113.292	127.125	142.042	117.417	147.167	117.417	125.5	114.75
hsa-miR-524-5p	243.042	290	291.667	229	247.167	308.958	224.75	223.875	271.125	208.833	252.083	325.083
hsa-miR-525-3p	722.167	855.542	783.667	971.5	820.875	916.083	812.125	610.333	991.875	734.583	916.083	697.042
hsa-miR-525-5p	1209.38	934.125	1145.79	1229.08	761.625	1145.79	1203.42	896.583	838.125	1137.29	1103.96	859.25
hsa-miR-526b	56.0833	54.0417	46	51.3333	59.0833	44.2083	52.625	49.7083	60.5417	51.3333	51.625	44.2083
hsa-miR-526b*	66.0833	58.375	66.0833	65.375	67.8333	67.8333	97.2917	68.0417	56.7083	71.9583	70.2917	71.125
hsa-miR-526b:9.1	108.208	105.375	100.083	115.167	94.9167	88.5417	102	96.1667	90.4167	106.417	104.958	76.3333
hsa-miR-532-3p	12913.3	13596.8	13596.8	10681.9	12913.3	14532.8	11951.4	12463	13196.7	12191.8	13789.9	14532.8
hsa-miR-532-5p	4906.21	5187.92	6323.42	5632.5	6323.42	5751.04	5235.54	6682.79	6147	6276.46	5632.5	5825.75
hsa-miR-539	947.625	916.083	916.083	824.208	960.708	909.917	815.75	971.5	774.625	1167.71	1178.75	974.917
hsa-miR-541	144.542	151.917	133.25	115.167	138.917	180.75	127.583	96.1667	135.417	138.458	101.542	86.7708
hsa-miR-541*	145.333	128.625	133.875	150.25	127.583	110.917	118.333	150.25	110.917	140.833	133.25	136.292
hsa-miR-542-3p	490.792	396.75	701.042	615.542	319.833	313.042	490.792	937.875	190.958	801.042	544.875	347.042
hsa-miR-542-5p	370.125	298.208	271.125	774.625	527.583	379.875	390.25	312	366.958	271.125	220.167	722.167
hsa-miR-543	150.917	157.792	266.417	178.542	142.042	294.583	218.667	143.167	221.833	255.708	210.458	217.833
hsa-miR-544	20318	23970.2	20318	17580	23696.1	24339.8	24504.3	16473.1	26426.8	18726.1	21036.4	23231.5
hsa-miR-545	89.5833	77.125	81.7917	79.25	78.2917	87.125	87.7083	74.875	71.9583	81.375	93.8333	68.4583
hsa-miR-545*	152.958	151.917	199.5	151.917	138.917	188.417	173.292	189.25	138.917	208.833	217.125	149.667
hsa-miR-545:9.1	766.958	815.75	921.708	729.5	701.042	780.208	676.167	855.542	701.042	759	855.542	828.542
hsa-miR-548a-3p	2854.54	2681.54	2774.42	2999.83	2355.5	2708	2878.21	2340.79	2424.58	2539.25	2797.92	2120.92
hsa-miR-548a-5p	81.7917	63.4583	68.4583	72.6667	64.6667	64.4167	63.4583	68.0417	67.2083	78.0417	65.7917	64.1667
hsa-miR-548b-3p	404.5	271.875	368.292	459.25	286.958	333.708	333.708	415.583	338.042	395.25	342.875	390.25
hsa-miR-548b-5p	4220.71	4028.33	4481.83	4133.17	3688.88	4220.71	3992.58	4065.96	3839.71	4220.71	4481.83	3718.17
hsa-miR-548c-3p	169.083	151.917	180.208	166.708	149.167	176.167	173.292	157.792	167.625	178.167	167.625	184.542
hsa-miR-548c-5p	404.5	455.5	415.583	431.208	410.042	354.583	485.083	494.917	338.042	490.792	480.125	334.417
hsa-miR-548d-3p	467.167	350.667	373.375	652.292	283.458	290.708	525.208	549.708	278.042	355.792	323.625	368.292
hsa-miR-548d-5p	1979.04	2729.25	2424.58	3020.75	2539.25	2854.54	2618.96	1637.75	2999.83	2134.13	2854.54	2052
hsa-miR-548e	196	144.958	189.75	140.292	98.1667	102.583	142.042	342.875	99.5417	347.042	187.208	160.917
hsa-miR-548f	783.667	664.958	676.167	726.083	557.958	575.208	741.125	747.917	575.208	751.792	579.042	618.75
hsa-miR-548g	196.75	231	249.208	219.542	232.583	247.167	202.208	211.042	241.958	213.125	232.583	223.208
hsa-miR-548h	120.333	111.833	131.667	111.833	99.5417	101.25	91.1042	131.208	96.1667	121.708	87.7083	150.917
hsa-miR-548i	190.958	269.25	200.75	292.625	183.917	215.167	241.083	151.542	222.583	225.75	213.125	174.375
hsa-miR-548j	166.167	278.042	234.208	253.042	156.167	222.583	353.417	282.167	427.708	331.542	352.25	268.25
hsa-miR-548k	73.125	68.7917	94.1042	77.25	91.1042	69.25	70.8333	84.375	68.7917	73.3333	100.083	60.125
hsa-miR-548l	182.958	177.75	246.5	208.833	161.292	188.417	198.917	169.792	162.833	243.042	201.5	190.958
hsa-miR-548m	685.542	387.167	771	759	325.083	808.708	937.875	376.042	747.917	991.875	441.875	656.208
hsa-miR-548n	40.3333	40.3333	41.7917	40	43.5417	40	46.2917	44.2083	46	55.75	46.6667	49.7083
hsa-miR-548o	172.458	139.417	148.542	189.25	159.917	178.167	83.1042	244.917	103.042	188.417	106.646	103.563
hsa-miR-548p	208.333	171.333	196	263.792	182.958	209.625	211.708	191.458	174.375	230.125	196	150.917
hsa-miR-549	253.042	224.75	255.708	271.125	368.292	221.833	290.708	291.667	218.667	370.125	234.208	169.083
hsa-miR-550	3801.75	3445.71	2406.96	3445.71	3340.33	3040.63	4065.96	3801.75	3340.33	2729.25	3109.54	2878.21
hsa-miR-550*	3591.08	3340.33	2285.04	3279.83	3218.21	3340.33	3718.17	3558.5	4565.17	2155.63	1875.58	3419.92
hsa-miR-551a	2754.38	2497.5	2854.54	2797.92	2389.63	2681.54	2708	2247.33	2340.79	2389.63	2754.38	2424.58
hsa-miR-551b	54.3333	42.3333	49.7083	43.9583	51.3333	51.3333	45.3333	57.25	56.7083	55.75	58.6667	39.125
hsa-miR-551b*	83.1042	126.125	68.4583	101.542	180.208	91.1042	161.292	90.7083	87.125	70.625	118.875	134.583
hsa-miR-552	150.917	156.167	159.417	131.208	129.708	157.292	130.583	128.958	142.542	116.208	144.542	152.958
hsa-miR-553	147.167	179.125	114.167	161.292	169.083	144.958	144.542	112.833	119.5	92.2083	154.375	138.458
hsa-miR-554	523.208	544.875	485.083	516.708	553.583	534.25	501.667	544.875	599.625	480.125	540.542	508.708
hsa-miR-555	79.7083	74.875	88.5417	87.125	70.8333	79.25	80.4167	68.0417	68.7917	90.7083	76.75	69.375
hsa-miR-556-3p	121.708	81.375	92.7917	161.292	118.333	51.3333	152.5	75.75	40.8333	168.333	103.042	78.5
hsa-miR-556-5p	69.25	47.9167	62.1667	47.9167	44.2083	44.2083	43.9583	54.0417	46	86.4583	43.5417	42.625
hsa-miR-557	49.4167	41.2917	54.0417	43.9583	46	76.3333	74.0417	59.7917	44.625	51.3333	51.625	100.083
hsa-miR-558	84.8542	87.125	110.917	79.7083	82.0417	90.4167	83.1042	89.25	132.208	61.0417	92.5	100.083
hsa-miR-559	300.75	280.875	299.708	319.833	253.042	286.125	328.708	334.417	312	341.5	308.958	254.958
hsa-miR-560:9.1	2681.54	2878.21	2497.5	2235.75	2729.25	2355.5	2375.88	2211.38	2285.04	1521	2172.21	2754.38
hsa-miR-561	74.0417	87.125	96.1667	78.2917	87.125	89.5833	72.6667	91.625	89.25	81.375	75.375	98.5417
hsa-miR-562	44.2083	54.0417	45.3333	46	47.5833	42.3333	43.9583	51.1667	101.542	45.75	45.3333	43.5417
hsa-miR-563	291.667	266.417	295.75	339.333	267.208	301.958	297	323.625	238.208	331.542	347.042	255.708
hsa-miR-564	1489.08	1848.63	1702.04	1408.92	1553.63	1801.04	1587.54	1397.21	2120.92	1258.13	1408.92	1786.58
hsa-miR-565:9.1	9234.96	8457.13	5973.54	8244.25	8743.33	7926.92	9000.63	5825.75	6798.54	6682.79	5187.92	5591.04
hsa-miR-566	766.958	986.375	824.208	592.25	1132.88	1058.92	759	846.5	859.25	673.125	689.25	926.083
hsa-miR-567	147.167	115.167	155	161.292	111.833	150.917	142.042	113.708	115.875	159.917	127.583	121.708
hsa-miR-568	173.833	181.667	163.625	170.208	182.292	181.667	200.75	172.458	187.75	164.208	198.917	178.167
hsa-miR-569	178.167	134.583	157.792	164.208	132.75	120.333	122.875	180.75	370.125	160.917	173.292	156.708
hsa-miR-570	190.958	224.75	202.208	210.458	204.5	105.375	152.5	189.25	183.375	200.75	139.417	178.167
hsa-miR-571	1234.33	1019.92	1041.04	1041.04	934.125	1019.92	1167.71	1008.71	1008.71	1132.88	986.375	947.625
hsa-miR-572	470.917	648.792	529.75	439.917	615.542	587.917	467.167	478.708	581.5	319.833	480.125	553.583
hsa-miR-573	531.75	366.958	512.958	523.208	368.292	453.542	546.833	402.583	300.75	525.208	438.083	325.083
hsa-miR-574-3p	15302.7	16158.6	12771.5	13083.2	15764.5	15764.5	15953.4	13083.2	16820.7	10853.9	12316.2	16473.1
hsa-miR-574-5p	5235.54	7144.83	5075.33	6409.96	7861.13	7736.21	7584.58	3503	9341	5380.92	6276.46	6409.96
hsa-miR-575	68.7917	49.4167	47.0417	57.9167	75.375	82.7917	41.2917	43.2083	47.0417	55.75	53.7917	65.0417
hsa-miR-576-3p	173.833	209.625	144.542	269.25	257.875	215.167	243.792	169.792	155	261.792	158.375	181.292
hsa-miR-576-5p	7049.08	7687.54	7687.54	9538.38	7144.83	7049.08	7926.92	6212.92	5591.04	9832.13	8875.5	7144.83
hsa-miR-577	303.167	323.625	563.75	374.667	185.792	236.667	254.042	443.25	277	701.042	388.708	261.792
hsa-miR-578	297	370.125	315.958	331.542	342.875	373.375	318.75	319.833	357.667	286.125	374.667	297
hsa-miR-579	129.708	168.333	170.208	165.167	109.833	100.083	132.75	278.042	73.3333	205.708	200.75	117.417
hsa-miR-580	260.167	247.167	274	277	241.958	232.583	248.167	275.917	192.167	269.25	226.5	237.375
hsa-miR-581	227.375	229	219.542	239.458	196	238.667	233.125	211.042	189.25	229	244.917	221.833
hsa-miR-582-3p	98.9583	94.375	107	104.625	96.7083	102.583	78.875	85.4167	71.9583	88.5417	89	103.563
hsa-miR-582-5p	1801.04	1476.83	2134.13	2618.96	2120.92	1345.08	1296.58	3172	1476.83	3748.21	2039.17	1875.58
hsa-miR-583	841.833	780.208	755.625	855.542	701.042	838.125	832.083	661.833	891.333	793.083	824.208	604
hsa-miR-584	10985.2	12913.3	12191.8	11951.4	12591.3	12463	11752.5	10301.3	11752.5	12771.5	13360	11084.5
hsa-miR-585	1281.25	1103.96	1031.17	1397.21	942.375	1076.17	1328.17	1065.29	998.167	1209.38	1152.79	872.583
hsa-miR-586	154.375	130.583	140.833	198.917	121.708	135.417	180.208	148.542	123.583	170.208	151.917	109.125
hsa-miR-587	78.2917	108.542	100.083	92.2083	74.0417	93.4792	83.1042	90.7083	105.375	103.563	85.4167	132.208
hsa-miR-588	334.417	254.042	423.333	243.042	322.25	325.083	300.75	438.083	233.125	406.917	334.417	344.292
hsa-miR-589	2999.83	2797.92	1863.33	2640.83	2774.42	3688.88	3367.17	1923.88	4734.08	1229.08	1660.13	2640.83
hsa-miR-589*	457.5	318.75	441.875	410.042	480.125	429.375	286.125	512.958	388.708	629.5	538.792	419
hsa-miR-590-3p	571.875	304.75	851.708	751.792	175.333	234.833	323.625	1094.04	314.5	3020.75	592.25	310.667
hsa-miR-590-5p	113.292	121.708	102.583	116.208	109.833	84.8542	109.833	151.542	68.7917	127.583	114.75	70.625
hsa-miR-591	1312.04	1337.75	1217.33	1449.96	1258.13	1272.71	1489.08	1184	1319.79	1223.58	1296.58	971.5
hsa-miR-592	431.208	332.958	417.125	368.292	293.75	348.5	395.25	429.375	282.167	388.708	379.875	352.25
hsa-miR-593	176.833	221.833	192.833	189.25	232.583	261.792	266.417	177.25	423.333	197.375	194.208	223.208
hsa-miR-593*	116.667	157.292	114.75	113.708	184.542	138.458	189.75	109.833	268.25	109.125	131.667	179.792
hsa-miR-594:9.1	11299.9	9977.33	9000.63	11299.9	9604.67	7807.21	11675.5	14532.8	8303.67	8406	7986.71	7341.29
hsa-miR-595	75.9167	347.042	73.6667	73.3333	100.167	105.375	70.8333	166.708	153.792	75.75	114.75	101.25
hsa-miR-596	441.875	515.042	439.917	481.292	468.708	510.875	499	404.5	595.458	439.917	505.792	411.667
hsa-miR-597	170.208	183.375	152.958	166.708	159.917	173.292	178.542	152.958	144.958	146.625	179.125	147.583
hsa-miR-598	1500.13	1647.21	1114.25	1801.04	1265.71	1265.71	1637.75	1619.04	2211.38	2080.83	1173.08	1408.92
hsa-miR-599	67.8333	78.5	78.2917	66.3333	69.375	55.3333	55.3333	68.0417	49.4167	63.0417	61.0417	81.7917
hsa-miR-600	73.125	68.7917	78.2917	77.25	76.3333	67.8333	76.3333	74.0417	67.2083	78.0417	90.7083	61.7917
hsa-miR-601	83.1042	103.563	71.125	80.7917	78.2917	75.1667	108.208	71.9583	68.7917	74.5417	79.25	61.7917
hsa-miR-602	337.042	244.917	308.958	326.5	234.833	283.458	253.042	263	169.083	253.042	283.458	211.042
hsa-miR-603	2039.17	3084.63	2052	1875.58	3992.58	3419.92	2999.83	2039.17	5285.25	1908.63	3194.67	2977.63
hsa-miR-604	801.042	916.083	260.833	604	952.083	979.792	664.958	266.417	1510.67	110.292	138.458	1691.71
hsa-miR-605	103.042	130.583	113.292	110.917	131.208	121.708	146.125	109.125	202.208	90.7083	108.542	136.292
hsa-miR-606	35	30.5	32.9167	32.9167	35.7083	35.7083	32.0833	32.9167	30.5	34.4583	32.0833	32.0833
hsa-miR-607	569.833	560.292	587.917	467.167	581.5	527.583	480.125	618.75	571.875	360.125	581.5	796.208
hsa-miR-608	223.208	179.125	182.958	144.542	212.292	185.125	207.542	203.875	133.25	202.917	148.542	213.875
hsa-miR-609	606.917	470.917	553.583	612.792	435.792	529.75	587.917	496.292	459.25	557.958	525.208	525.208
hsa-miR-610	2729.25	1303.5	2955.88	1352	1120.46	778	1386.46	4028.33	478.708	3218.21	1242.71	2497.5
hsa-miR-611	42.3333	37.9583	40.3333	42.625	40.8333	37.9583	40.3333	38.5	40.8333	40.3333	42.3333	39.125
hsa-miR-612	512.958	841.833	396.75	398.375	1003.75	632.792	747.917	480.125	1234.33	540.542	648.792	673.125
hsa-miR-613	211.042	204.5	234.208	171.875	152.5	161.875	156.708	221.833	114.167	218.667	170.667	159.917
hsa-miR-614	1217.33	952.083	1110.08	1178.75	815.75	1217.33	1469.42	934.125	1312.04	1386.46	1087.71	1065.29
hsa-miR-615-3p	10212.5	10681.9	10382	9604.67	10212.5	10576.2	9767.33	10681.9	10382	9901.5	10212.5	10494
hsa-miR-615-5p	8875.5	8406	9279.17	7861.13	8680.42	9234.96	8244.25	8743.33	9387.54	7396.63	6409.96	8743.33
hsa-miR-616	104.167	103.563	77.25	119.875	165.625	140.833	151.542	78.2917	117.875	73.3333	93.8333	97.2917
hsa-miR-616*	266.417	202.208	249.208	314.5	228.167	159.917	174.833	326.5	90.4167	284.333	180.208	193.5
hsa-miR-617	293.75	237.375	260.833	341.5	220.917	286.125	348.5	234.208	235.708	335.667	271.125	202.917
hsa-miR-618	280.875	355.792	337.042	317.333	352.25	337.042	274	339.333	361.583	295.75	358.833	349.833
hsa-miR-619	523.208	722.167	606.917	587.917	697.042	722.167	704.625	457.5	1184	461.042	563.75	575.208
hsa-miR-620	215.167	237.375	225.75	247.167	212.292	270.333	230.125	213.125	231.917	213.125	250.042	264.792
hsa-miR-621	48.7917	50.75	51.9167	49.7083	61.7917	52.625	52.9167	51.1667	57.9167	47.9167	51.625	55.0417
hsa-miR-622	127.125	138	96.1667	112.833	171.875	185.125	146.125	104.167	207.542	87.125	112.333	174.375
hsa-miR-623	94.1042	131.667	244.917	99.5417	200.75	196.75	234.833	189.25	441.875	121.708	100.083	284.333
hsa-miR-624	312	252.083	481.292	318.75	261.792	259.125	257.875	363.292	263	473.708	353.417	444.583
hsa-miR-624*	4177.5	2556.54	5700.38	3591.08	2026.13	2195.04	3146.96	5884.88	1223.58	6409.96	4065.96	2918.58
hsa-miR-625	18998.6	19211.4	19453.6	20465.1	19211.4	19453.6	19453.6	20137.7	19211.4	21196.3	20720.8	19821.5
hsa-miR-625*	18240.9	17580	17077.8	17850.5	18240.9	17077.8	18998.6	17077.8	17294.7	15953.4	17580	17580
hsa-miR-626	239.458	263	244.917	274.917	239.458	268.25	286.125	226.5	275.917	243.042	290	196
hsa-miR-627	1637.75	2267.38	3020.75	2556.54	2247.33	1884.08	1923.88	1761.13	1575.83	2454.88	2454.88	1476.83
hsa-miR-628-3p	1544.5	1036.79	1713	2319.33	1476.83	1908.63	1801.04	1076.17	916.083	1813.42	1587.54	1312.04
hsa-miR-628-5p	1386.46	1203.42	1223.58	1575.83	886.542	1281.25	1959.25	673.125	636.458	1884.08	2026.13	704.625
hsa-miR-629	1272.71	1637.75	1229.08	1691.71	1749.21	1724.29	1132.88	2120.92	1951.96	1312.04	1430.08	1025.71
hsa-miR-629*	4521.96	5339.13	3913.88	4626.25	5187.92	4255.13	4220.71	3255.75	4065.96	3558.5	3020.75	4133.17
hsa-miR-630	79.7083	80.1667	86.7708	99.5417	91.1042	110.917	87.7083	75.75	81	95.3333	75.375	72.375
hsa-miR-631	199.5	197.375	147.167	217.125	197.375	244.917	181.667	152.958	285.5	171.333	261.792	163.625
hsa-miR-632	225.75	295.75	263.792	206.583	236.667	345.458	340.167	222.583	348.5	213.125	328.708	303.167
hsa-miR-633	60.7917	64.4167	71.125	80.4167	71.9583	83.75	59.5417	75.75	76.3333	69.375	65.7917	77.4583
hsa-miR-634	390.25	344.292	342.875	387.167	330.708	350.667	448.333	337.042	503.375	410.042	340.167	313.042
hsa-miR-635	56.0833	56.7083	66.0833	52.375	73.125	55.3333	56.25	58.6667	56.7083	70.625	44.2083	51.9167
hsa-miR-636	1173.08	1114.25	1178.75	921.708	971.5	815.75	974.917	886.542	1296.58	780.208	979.792	1137.29
hsa-miR-637	178.167	153.792	149.667	159.917	134.583	134.583	144.542	152.958	181.667	192.833	134.583	148.542
hsa-miR-638	388.708	645.5	473.708	244.917	381.667	668.708	290.708	332.958	361.583	247.167	365.958	556.083
hsa-miR-639	91.1042	174.833	221.833	65.375	165.167	154.375	105.375	157.792	223.875	134.583	120.583	274
hsa-miR-640	189.25	110.292	119.5	117.875	101.25	132.75	84.8542	125.5	56.7083	97.8542	86.4583	69.375
hsa-miR-641	916.083	717.125	734.583	900.083	708.625	676.167	796.208	812.125	494.917	778	864.042	520.375
hsa-miR-642	3839.71	3992.58	5187.92	5123.92	4255.13	5001.21	3474.38	2235.75	4133.17	4950.33	4349.88	6147
hsa-miR-643	345.458	299.708	364.542	404.5	275.917	427.708	398.375	304.75	314.5	413.333	371.542	277
hsa-miR-644	127.125	139.417	103.563	81.7917	102	219.542	115.167	116.208	199.5	124.167	120.583	128.958
hsa-miR-645	290	279.083	379.875	334.417	402.583	331.542	379.875	370.125	253.042	348.5	325.083	290
hsa-miR-646	937.875	759	956.208	828.542	623	891.333	926.083	652.292	1337.75	921.708	841.833	896.583
hsa-miR-647	656.208	832.083	751.792	701.042	741.125	801.042	986.375	692.958	761.625	855.542	1047.54	1319.79
hsa-miR-648	84.0417	102.583	71.125	81.7917	82.0417	128.625	77.25	74.0417	66.0833	79.25	90.7083	132.208
hsa-miR-649	139.417	136.292	124.167	133.875	119.875	128.625	128.958	125.5	105.375	127.583	150.25	123.583
hsa-miR-650	91.1042	74.875	71.125	67.8333	89	78.2917	63.4583	101.542	192.167	71.9583	65.7917	71.125
hsa-miR-651	1364.38	1094.04	1288.67	1234.33	734.583	1053.54	1173.08	1281.25	851.708	1500.13	1013.42	838.125
hsa-miR-652	2556.54	2481.96	2440.04	2824.46	2406.96	3109.54	2824.46	2454.88	3310.46	3060.21	2708	2655.71
hsa-miR-653	880.792	896.583	774.625	905.125	755.625	747.917	793.083	872.583	921.708	808.708	805.25	738.125
hsa-miR-653:9.1	158.375	157.792	148.542	175.333	171.875	157.292	168.333	133.875	142.542	181.292	147.167	132.208
hsa-miR-654-3p	270.333	257.875	246.5	220.167	301.958	211.708	196.75	231.917	212.292	220.167	211.708	265.625
hsa-miR-654-5p	322.25	531.75	494.917	446.417	636.458	618.75	557.958	499	744.083	399.75	459.25	563.75
hsa-miR-655	94.1042	148.125	111.833	122.125	87.125	79.25	149.667	133.875	71.4583	197.375	192.833	92.5
hsa-miR-656	44.2083	59.5417	42.625	70.625	40.8333	35.7083	40.3333	49.7083	37.9583	59.5417	46	37.0833
hsa-miR-657	205.708	190.625	189.75	233.125	209.625	174.833	200.75	200.042	162.833	217.125	229.333	158.375
hsa-miR-658	78.0417	100.083	85.4167	80.7917	84.0417	93.4792	67.375	78.0417	53.7917	69.375	73.125	155.542
hsa-miR-659	1702.04	1786.58	1436.46	1544.5	1724.29	1460.42	1678.25	1895.04	1678.25	1544.5	1619.04	1735.17
hsa-miR-660	1103.96	771	1735.17	1670.63	916.083	859.25	1019.92	2797.92	704.625	2340.79	1521	766.958
hsa-miR-661	546.833	571.875	425.583	374.667	499	443.25	523.208	490.792	549.708	373.375	408.458	664.958
hsa-miR-662	62.1667	89	60.125	75.75	51.3333	77.25	67.375	70.8333	49.4167	49	57.25	65.0417
hsa-miR-663	4626.25	4521.96	4734.08	3474.38	4349.88	4869.25	3419.92	4349.88	3445.71	3084.63	3952.42	4806.33
hsa-miR-663b	3084.63	4420.67	3653	2267.38	3801.75	3777.79	3558.5	3913.88	3393.25	1408.92	4806.33	5339.13
hsa-miR-664	6560.21	3419.92	7452.92	6560.21	3393.25	2918.58	4950.33	11299.9	1939.38	8072.42	5591.04	5751.04
hsa-miR-664*	1288.67	1070.38	1691.71	1167.71	1126.29	1082.25	966.417	6081.46	1058.92	1575.83	956.208	1544.5
hsa-miR-665	1126.29	1120.46	1076.17	864.042	1345.08	1094.04	1159.67	1167.71	876.375	896.583	1126.29	1265.71
hsa-miR-668	315.958	315.958	231	264.792	245.625	292.625	256.667	288.292	274.917	238.208	286.958	223.208
hsa-miR-671:9.1	805.25	832.083	592.25	629.5	729.5	851.708	1013.42	751.792	801.042	685.542	751.792	780.208
hsa-miR-671-3p	5440.54	5751.04	6081.46	4255.13	5285.25	5285.25	4481.83	6323.42	5123.92	5001.21	5380.92	5884.88
hsa-miR-671-5p	98.1667	98.5417	90.4167	103.042	99.5417	140.833	134.583	86.4583	89.25	89.25	81.375	101.25
hsa-miR-675	2824.46	3777.79	2918.58	2306.42	2618.96	3839.71	3279.83	1875.58	2389.63	2519.25	3279.83	3393.25
hsa-miR-7	24730.9	19643.8	21036.4	24339.8	18726.1	17580	24084.6	22781.3	13789.9	26308.6	22916.2	19961.6
hsa-miR-708	4255.13	3255.75	5339.13	4806.33	3172	4093.75	3913.88	5380.92	3688.88	5928.46	5491.71	3801.75
hsa-miR-708*	223.875	164.625	181.667	244.917	167.625	178.167	227.375	207.542	179.792	229.333	217.125	170.667
hsa-miR-7-1*	2340.79	3393.25	2584.38	4065.96	4177.5	2497.5	2955.88	3109.54	3474.38	2406.96	1908.63	1825.25
hsa-miR-7-2*	51.1667	49.4167	44.2083	44.625	47.5833	42.3333	46.2917	46.2917	43.2083	45.75	51.625	56.7083
hsa-miR-720	27134.8	27452.7	28079.2	26426.8	26723.5	26915.8	26558	28079.2	26194.6	26033	26915.8	26915.8
hsa-miR-744	11180.5	11435.6	11675.5	10301.3	11951.4	13196.7	11820.9	10494	13360	10301.3	11572.6	12316.2
hsa-miR-744*	322.25	288.292	345.458	354.583	193.5	360.125	374.667	288.292	261.792	435.792	232.583	283.458
hsa-miR-760	2708	2918.58	2681.54	2120.92	2708	3503	2247.33	1801.04	3367.17	1939.38	2895.88	3109.54
hsa-miR-765	170.208	232.583	213.875	204.5	285.5	255.708	213.125	203.875	282.167	181.292	182.292	230.125
hsa-miR-766	2424.58	2824.46	2355.5	1627.63	2340.79	2977.63	2440.04	1959.25	2729.25	1775.38	2999.83	2797.92
hsa-miR-767-3p	867.667	734.583	971.5	1013.42	717.125	557.958	673.125	751.792	673.125	998.167	820.875	1203.42
hsa-miR-767-5p	6466.67	7049.08	5751.04	6276.46	8137.83	8303.67	5285.25	5187.92	10139	3233.54	3869.08	8137.83
hsa-miR-768-3p:11.0	26723.5	22781.3	24730.9	19211.4	22460	21633.3	22781.3	24504.3	21504.6	17850.5	18998.6	27134.8
hsa-miR-768-5p:11.0	23231.5	22306.3	23231.5	21036.4	21633.3	20137.7	22075.7	23696.1	19643.8	19643.8	18726.1	24084.6
hsa-miR-769-3p	1895.04	1606.58	1469.42	1724.29	1848.63	1863.33	1217.33	1713	2172.21	2306.42	1749.21	2440.04
hsa-miR-769-5p	6748.96	7861.13	6850.42	7986.71	8875.5	8580.13	7280.75	7280.75	9682.42	6323.42	6748.96	8244.25
hsa-miR-770-5p	106.646	100.083	160.917	85.5833	70.8333	124.167	72.6667	166.708	200.042	95.3333	191.458	190.958
hsa-miR-801:9.1	480.125	254.042	465.333	366.958	288.292	357.667	378.25	641.167	264.792	376.042	370.125	337.042
hsa-miR-802	246.5	217.833	286.958	215.875	199.5	225.75	183.917	308.958	189.25	252.083	268.25	253.042
hsa-miR-873	111.208	190.625	105.375	89.25	140.833	101.25	108.208	114.75	106.646	73.3333	100.083	159.917
hsa-miR-874	3367.17	2539.25	3310.46	2195.04	2267.38	2640.83	2539.25	3688.88	2655.71	3340.33	3419.92	5123.92
hsa-miR-875-3p	199.5	156.167	189.75	211.708	152.5	185.125	211.708	177.25	147.583	223.208	187.208	136.292
hsa-miR-875-5p	661.833	579.042	681.542	641.167	512.958	618.75	623	520.375	538.792	610.333	581.5	569.833
hsa-miR-876-3p	220.167	140.833	196	157.792	119.875	207.542	138.917	155.542	271.125	170.208	148.542	124.5
hsa-miR-876-5p	275.917	153.792	328.708	198.917	136.083	140.833	173.292	357.667	119.5	290.708	224.75	260.167
hsa-miR-877	11752.5	15953.4	11752.5	12771.5	17077.8	14877.2	14532.8	9604.67	16473.1	10752.3	12591.3	12771.5
hsa-miR-877*	3748.21	4309.71	1923.88	3310.46	4220.71	4521.96	4420.67	2306.42	5380.92	2481.96	4028.33	5187.92
hsa-miR-885-3p	370.125	374.667	388.708	267.208	257.875	350.667	348.5	263	354.583	345.458	291.667	293.75
hsa-miR-885-5p	92.2083	183.375	80.1667	74.0417	158.375	69.25	78.875	144.958	172.458	125.5	161.875	113.292
hsa-miR-886-3p	451.417	451.417	461.042	467.167	413.333	473.708	443.25	355.792	461.042	461.042	444.583	361.583
hsa-miR-886-5p	308.958	334.417	271.125	277	423.333	288.292	260.833	269.25	286.958	263.792	308.958	253.042
hsa-miR-887	658.833	704.625	801.042	715.25	771	715.25	656.208	584.125	734.583	711.667	595.458	846.5
hsa-miR-888	615.542	285.5	729.5	411.667	290.708	335.667	357.667	595.458	321.042	717.125	423.333	599.625
hsa-miR-888*	66.0833	63.4583	60.125	59.5417	80.4167	60.125	51.3333	61.0417	93.8333	61.0417	80.1667	49.7083
hsa-miR-889	2375.88	1587.54	3233.54	2285.04	1436.46	1564.79	2066.54	2708	909.917	3591.08	2306.42	1991.92
hsa-miR-890	1223.58	1167.71	1303.5	1209.38	1223.58	1352	1242.71	1229.08	1408.92	1234.33	1312.04	1103.96
hsa-miR-891a	100.083	185.792	101.542	140.292	166.708	171.333	148.125	114.75	180.75	130.583	71.125	103.563
hsa-miR-891b	32.9167	33.7917	34.4583	35	32.9167	33.7917	36.375	34.4583	30.5	34.4583	40	28.9167
hsa-miR-892a	43.2083	43.5417	43.2083	49.7083	47.5833	58.6667	57.4167	43.2083	40.8333	42.3333	58.6667	40.8333
hsa-miR-892b	45.75	51.625	63.75	57.25	78.2917	55.3333	49.9167	61.0417	93.8333	58.375	78.0417	64.1667
hsa-miR-9	8072.42	4220.71	9341	7512.08	3913.88	3952.42	5928.46	11951.4	2375.88	15302.7	9065.38	6466.67
hsa-miR-9*	1449.96	692.958	1575.83	3084.63	652.292	520.375	1660.13	2918.58	303.167	5700.38	1606.58	595.458
hsa-miR-920	173.833	219.542	187.75	185.125	180.208	188.417	205.208	187.208	203.875	220.167	170.667	181.292
hsa-miR-921	143.167	117.417	144.542	146.125	119.875	108.208	127.583	165.625	150.25	179.792	147.167	151.917
hsa-miR-922	237.375	231.917	306.208	255.708	221.833	282.167	248.167	250.042	243.042	299.708	229.333	293.75
hsa-miR-923	1132.88	1397.21	872.583	1234.33	1884.08	1364.38	2306.42	1120.46	1564.79	1895.04	2640.83	2454.88
hsa-miR-924	124.167	110.292	116.667	129.708	116.208	107	116.208	118.333	108.542	118.333	116.667	96.1667
hsa-miR-92a	24339.8	25246.3	25246.3	24892.9	24892.9	25246.3	24605.3	24208.3	25147.9	24339.8	24730.9	24892.9
hsa-miR-92a-1*	9467.42	9279.17	9682.42	9234.96	8944.25	10681.9	9234.96	6748.96	9279.17	6935.79	6995.63	7452.92
hsa-miR-92a-2*	370.125	371.542	207.542	333.708	425.583	268.25	348.5	193.5	285.5	195.542	232.583	331.542
hsa-miR-92b	22916.2	25036.5	21633.3	24208.3	25454.9	24730.9	24339.8	20318	25246.3	23362.8	24208.3	23485.9
hsa-miR-92b*	4481.83	6020.25	3777.79	4734.08	6521.08	5825.75	5632.5	3040.63	5825.75	3279.83	4677.33	5001.21
hsa-miR-93	21331	21715	22592.8	21504.6	22202.8	22592.8	20318	22075.7	23362.8	21504.6	22075.7	22202.8
hsa-miR-93*	2052	1908.63	2389.63	2584.38	1991.92	2026.13	1775.38	2375.88	2454.88	1564.79	1319.79	2247.33
hsa-miR-933	132.208	120.333	142.542	162.833	150.25	138.458	135.417	157.792	149.167	134.583	123.583	182.958
hsa-miR-934	64.1667	62.1667	63.75	89.25	63.0417	67.8333	64.4167	64.6667	65.0417	67.2083	73.125	60.7917
hsa-miR-935	24504.3	23696.1	21715	22781.3	23362.8	23485.9	23362.8	18998.6	22306.3	22781.3	22306.3	23970.2
hsa-miR-936	187.75	142.542	159.917	157.792	126.125	174.375	171.333	105.792	198	132.208	163.625	119.875
hsa-miR-937	66.0833	57.4167	61.0417	64.4167	89.9167	70.8333	74.0417	49.7083	92.2083	51.3333	49.7083	80.1667
hsa-miR-938	182.958	625.792	167.625	197.375	505.792	249.208	610.333	312	947.625	215.167	355.792	579.042
hsa-miR-939	9538.38	9682.42	10985.2	9467.42	9682.42	9832.13	9467.42	9130.38	8875.5	10139	10139	9767.33
hsa-miR-940	6409.96	6608.5	6276.46	5928.46	5632.5	6466.67	6682.79	6466.67	6466.67	6521.08	6798.54	6521.08
hsa-miR-941	6147	7986.71	5380.92	5751.04	7624.75	8183.92	7341.29	4950.33	8406	4349.88	8183.92	7986.71
hsa-miR-942	7341.29	8580.13	6748.96	7736.21	9176.88	7280.75	7049.08	6608.5	8944.25	7512.08	7807.21	7624.75
hsa-miR-943	1345.08	864.042	1813.42	812.125	905.125	1003.75	998.167	1436.46	828.542	1126.29	1041.04	1378.25
hsa-miR-944	37.0833	35.7083	71.125	54.3333	38.5	98.9583	42.625	36.375	161.292	59.5417	153.792	199.5
hsa-miR-95	629.5	508.708	1251.75	793.083	808.708	937.875	729.5	759	2026.13	1003.75	1251.75	864.042
hsa-miR-96	2066.54	1775.38	2729.25	2895.88	1825.25	1660.13	1863.33	3310.46	1825.25	2655.71	1939.38	2066.54
hsa-miR-96*	74.875	74.875	84.0417	133.875	74.0417	84.8542	75.375	77.125	89.25	86.4583	84.0417	83.1042
hsa-miR-98	14031.9	15075.2	14358.9	16820.7	13360	15509.2	16158.6	11820.9	11951.4	18240.9	18014.5	13196.7
hsa-miR-99a	357.667	366.958	268.25	374.667	274	243.792	321.042	364.542	223.875	410.042	387.167	215.167
hsa-miR-99a*	1386.46	1510.67	1265.71	1203.42	1319.79	1242.71	1265.71	1510.67	1251.75	1184	1258.13	1337.75
hsa-miR-99b	17077.8	16820.7	18492.5	16473.1	17294.7	18492.5	15764.5	19643.8	18726.1	16158.6	17294.7	18492.5
hsa-miR-99b*	4950.33	4677.33	5825.75	4869.25	5075.33	6147	4626.25	5591.04	6081.46	5123.92	5534.54	5973.54
solexa-1460-671	2918.58	3718.17	3084.63	2854.54	4028.33	3748.21	2774.42	2895.88	3869.08	1863.33	2539.25	3310.46
solexa-15-44487	3688.88	3367.17	3279.83	3393.25	2754.38	3233.54	3777.79	3233.54	3419.92	3653	2918.58	2618.96
solexa-2502-366	67.8333	67.375	90.4167	97.2917	114.75	57.25	67.375	89.25	89.25	117.417	68.7917	80.1667
solexa-2526-361	180.208	250.042	194.208	203.375	189.25	253.042	180.208	174.833	538.792	167.125	266.417	188.417
solexa-2580-353	40.3333	43.5417	36.375	37.9583	43.5417	51.3333	37.9583	40	40.8333	39.125	37.9583	37.0833
solexa-2683-338	3233.54	1449.96	4093.75	2211.38	1691.71	1251.75	1070.38	6935.79	567.25	2556.54	1272.71	1979.04
solexa-2952-306	21196.3	21504.6	22916.2	20318	20465.1	21331	19821.5	21893.8	18014.5	20885.9	21715	21893.8
solexa-3022-299	1761.13	1813.42	1337.75	1469.42	1500.13	1430.08	1761.13	1242.71	1173.08	1070.38	1713	1813.42
solexa-3044-295	1533.79	2708	905.125	991.875	2375.88	2424.58	1884.08	926.083	1713	1036.79	1597.33	1702.04
solexa-3126-285	1184	805.25	1724.29	1159.67	909.917	1152.79	971.5	1521	1328.17	2026.13	1863.33	1553.63
solexa-3277-272	354.583	417.125	419	321.042	269.25	279.083	323.625	2100.17	252.083	438.083	283.458	341.5
solexa-3464-254	18014.5	19961.6	20137.7	18014.5	20137.7	20465.1	17580	19961.6	21331	17580	20137.7	20720.8
solexa-3695-237	446.417	332.958	376.042	406.917	394.042	604	515.042	269.25	610.333	342.875	228.167	485.083
solexa-3793-229	571.875	841.833	571.875	681.542	1553.63	788	956.208	668.708	1378.25	571.875	685.542	717.125
solexa-3927-221	29270.8	28079.2	29270.8	28630.5	28630.5	28079.2	28630.5	29270.8	27134.8	29270.8	28630.5	29807
solexa-4793-177	10576.2	11675.5	9604.67	9682.42	11435.6	10077.5	9901.5	8627.13	8743.33	9767.33	10576.2	10301.3
solexa-499-2217	10139	10752.3	10139	8944.25	9977.33	9467.42	8743.33	10139	8680.42	8743.33	11820.9	11299.9
solexa-51-13984	19961.6	22592.8	15764.5	21715	22916.2	21504.6	21504.6	14723.4	20318	7049.08	19643.8	20318
solexa-5169-164	53.4167	72.6667	62.1667	72.6667	54.0417	48.7917	77.25	89.25	51.625	75.75	61.0417	48.25
solexa-539-2056	8244.25	10985.2	8944.25	7280.75	10681.9	11675.5	10077.5	7396.63	17077.8	7687.54	9901.5	11572.6
solexa-555-1991	1312.04	1229.08	905.125	1087.71	1408.92	1408.92	1521	1019.92	1209.38	1082.25	1076.17	1251.75
solexa-5620-151	3340.33	2640.83	2655.71	2481.96	2481.96	2895.88	2319.33	2729.25	2539.25	2267.38	2497.5	3952.42
solexa-578-1915	4309.71	3913.88	4385.83	3952.42	4521.96	3992.58	4521.96	4565.17	3621	4385.83	4385.83	5075.33
solexa-5874-144	150.917	122.875	124.167	127.917	113.292	113.292	121.125	127.583	82.0417	111.208	131.667	89
solexa-603-1846	7280.75	5285.25	8339.63	3801.75	3255.75	3621	4177.5	8680.42	2007.88	8627.13	7396.63	9538.38
solexa-6676-127	441.875	553.583	523.208	838.125	610.333	368.292	463.375	529.75	364.542	467.167	536.375	921.708
solexa-7111-119	116.667	67.375	100.083	109.542	117.417	93.4792	103.563	140.833	120.333	120.583	113.292	111.833
solexa-7297-115	299.708	120.333	144.542	231.917	217.125	179.792	155.542	299.708	193.5	234.208	134.583	239.458
solexa-7509-112	5339.13	5380.92	5591.04	4950.33	6020.25	6323.42	5123.92	6276.46	6323.42	5075.33	5339.13	4220.71
solexa-7534-111	556.083	942.375	632.792	664.958	1047.54	872.583	771	571.875	1178.75	595.458	838.125	676.167
solexa-7764-108	455.5	828.542	286.958	483.25	715.25	451.417	960.708	481.292	341.5	390.25	443.25	531.75
solexa-8000-104	160.917	135.417	180.208	229	250.042	136.083	187.75	172.458	170.667	202.917	205.708	163.625
solexa-8048-104	4093.75	5380.92	4521.96	3621	5075.33	5534.54	5700.38	3419.92	5700.38	3688.88	5285.25	4906.21
solexa-8211-102	3445.71	2066.54	4869.25	2497.5	1979.04	1436.46	2556.54	13596.8	1775.38	5339.13	3503	3653
solexa-826-1288	7396.63	7341.29	3367.17	8522.21	8339.63	6521.08	6748.96	5075.33	6995.63	1397.21	1801.04	8522.21
solexa-8926-93	584.125	595.458	468.708	569.833	880.792	820.875	937.875	444.583	697.042	512.958	553.583	812.125
solexa-9029-92	10494	10494	10494	10212.5	10301.3	10752.3	10382	9387.54	10301.3	10494	10494	9901.5
solexa-9081-91	1606.58	4220.71	1735.17	1489.08	3474.38	2854.54	1908.63	1825.25	4677.33	1192.75	2319.33	3445.71
solexa-9124-90	9065.38	9234.96	7736.21	7452.92	8580.13	8627.13	8339.63	8244.25	8339.63	7280.75	8406	8944.25
solexa-9578-86	755.625	697.042	726.083	722.167	510.875	681.542	722.167	625.792	587.917	815.75	623	623
solexa-9655-85	3952.42	4093.75	3839.71	2754.38	3367.17	4028.33	3020.75	3474.38	4481.83	3255.75	4309.71	4481.83
